# Supplementary material for: Determinants of astrocytic pathology in stem cell models of primary tauopathies
Source: Acta Neuropathol Commun. 2023 Oct 6;11:161. doi: 10.1186/s40478-023-01655-1 (PMC10557325; doi:10.1186/s40478-023-01655-1)
Supplement: Supplementary file 1 — Supplementary Material 1 [file 40478_2023_1655_MOESM1_ESM.docx]

**Supplementary Material**

**Determinants of Astrocytic Pathology in Stem Cell Models of Primary Tauopathies**

Kimberly L. Fiock PhD1,2, Jordan Hook BS1,4, Marco M. Hefti MD*1,2,3

1Department of Pathology, University of Iowa, Iowa City, IA

2Experimental Pathology Graduate Program, University of Iowa, Iowa City, IA

3Iowa Neuroscience Institute, University of Iowa, Iowa City, IA

4Carver College of Medicine, University of Iowa, Iowa City, IA

*To whom correspondence should be addressed:

Marco M. Hefti, MD

25 S Grand Ave MRC-108-A

Iowa City, IA 52240

(319)-335-8427

[marco-hefti@uiowa.edu](mailto:marco-hefti@uiowa.edu)


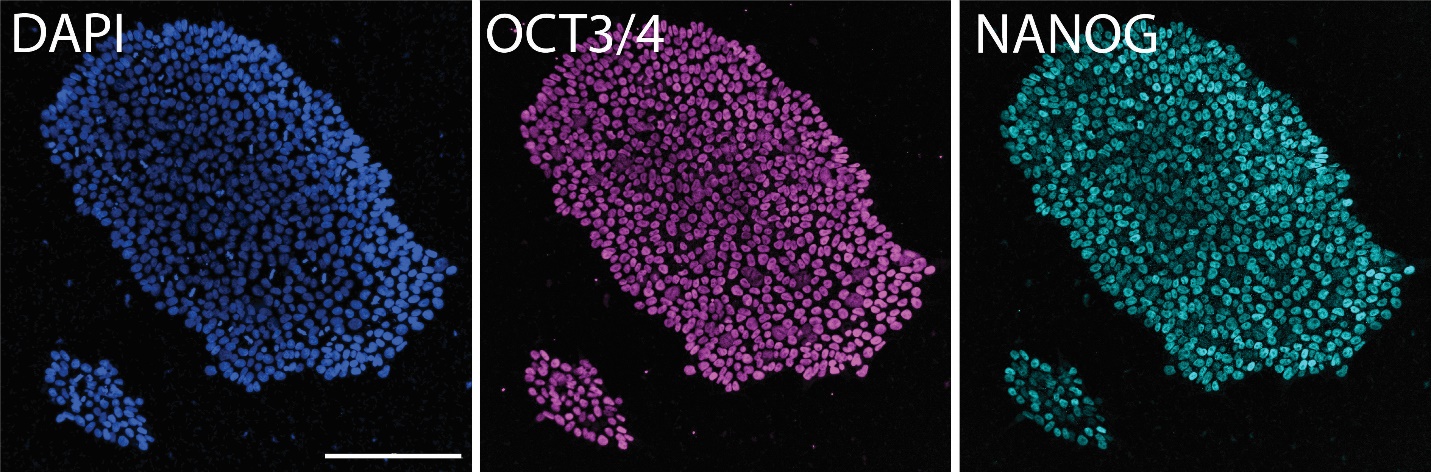


**Figure S1. Validation of stem cells by immunocytochemistry.** Channels shown separately for image in **Fig. 3**. Scale bar = 200 μm


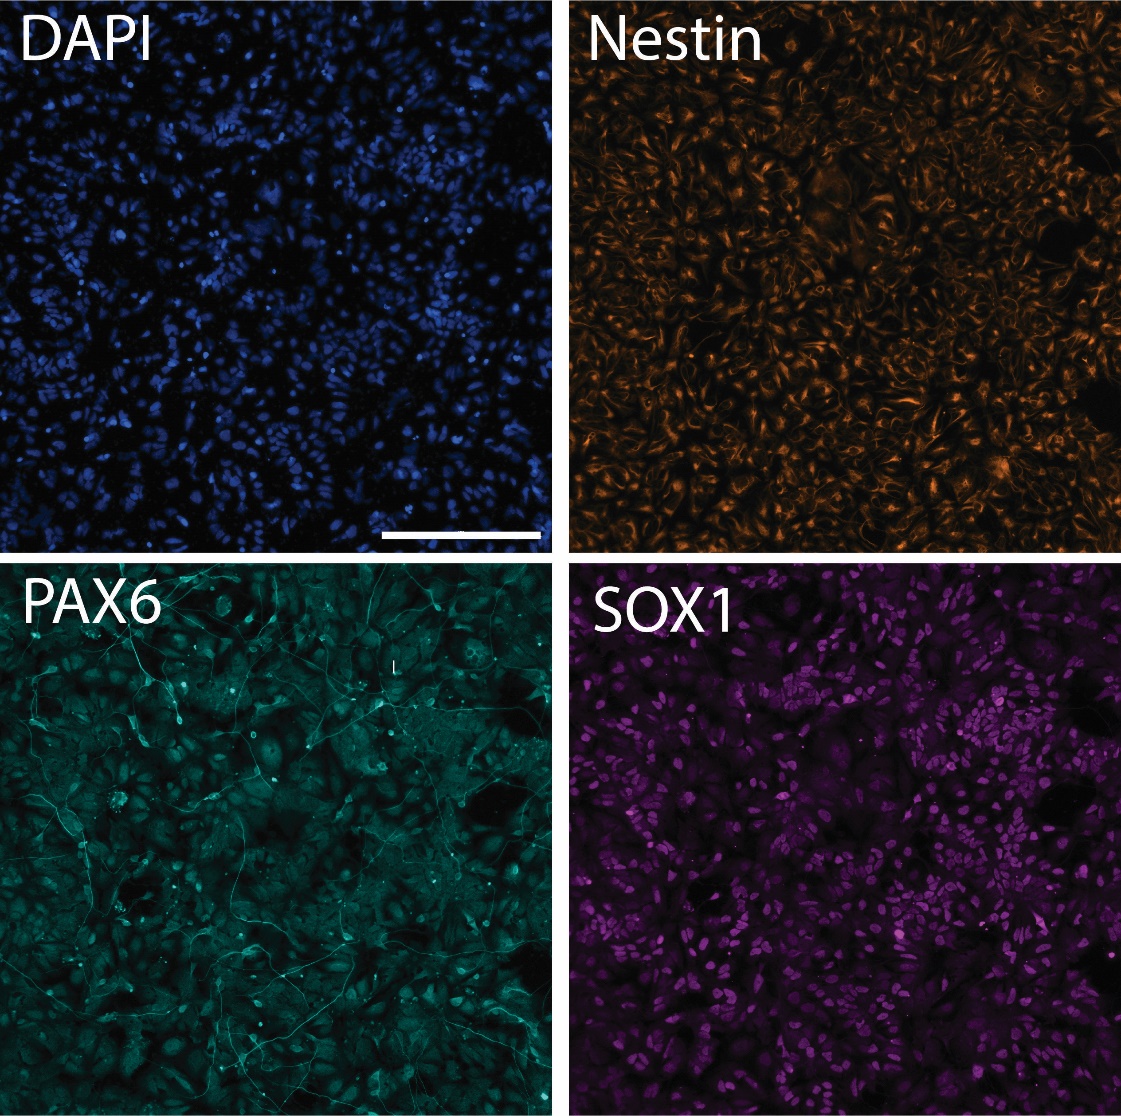


**Figure S2. Validation of neural progenitor cells by immunocytochemistry**. Channels shown separately for image in **Fig. 3**. Scale bar = 200 μm


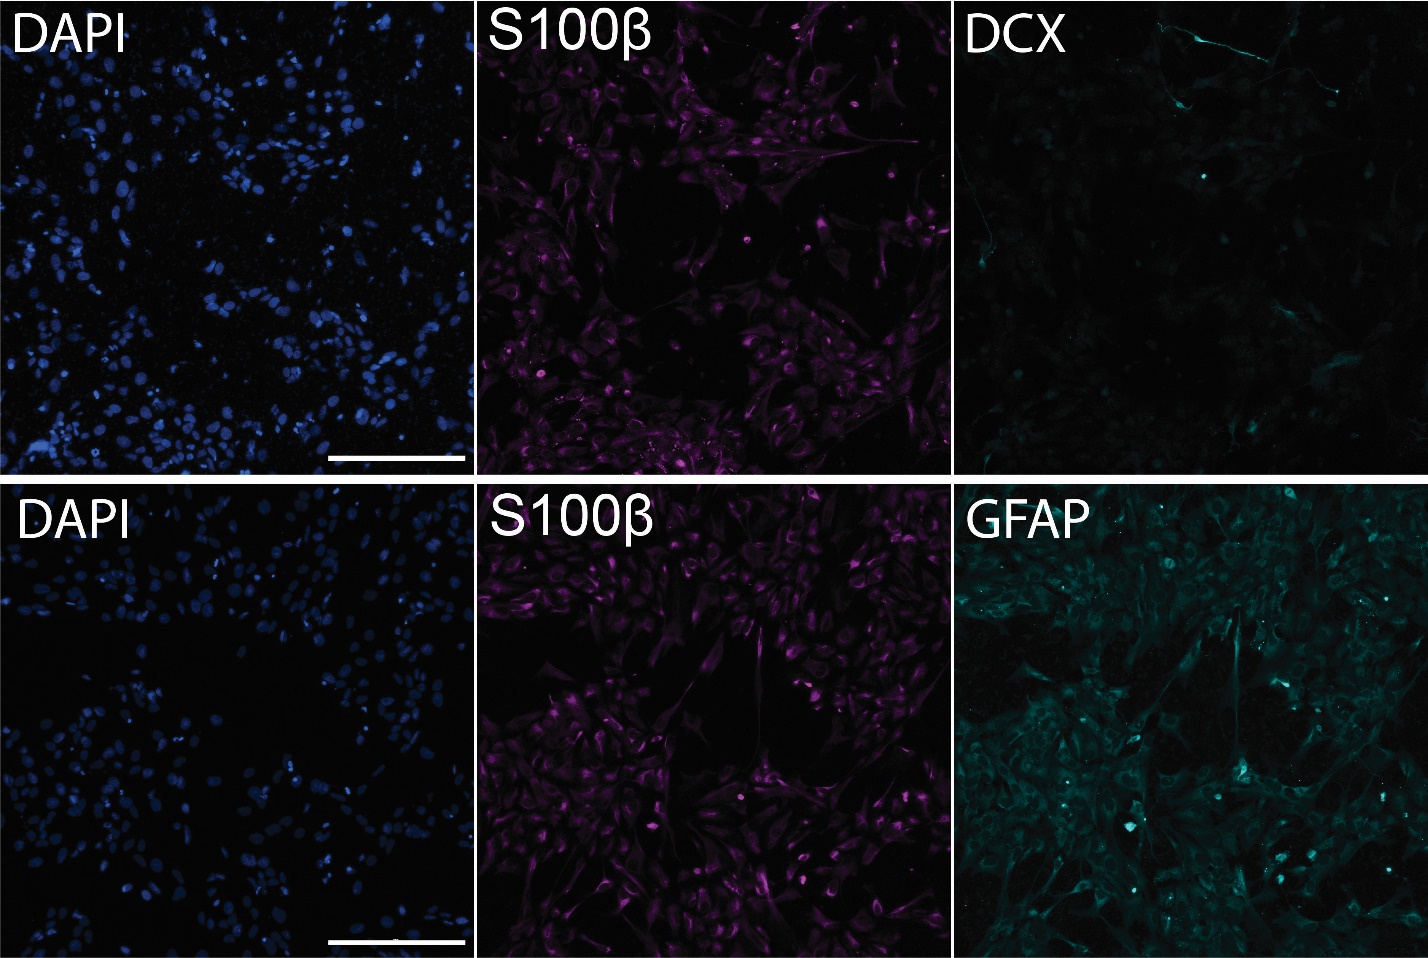


**Figure S3. Validation of astrocyte differentiation by immunocytochemistry.** Channels shown separately for image in **Fig. 3**. Scale bar = 200 μm

**
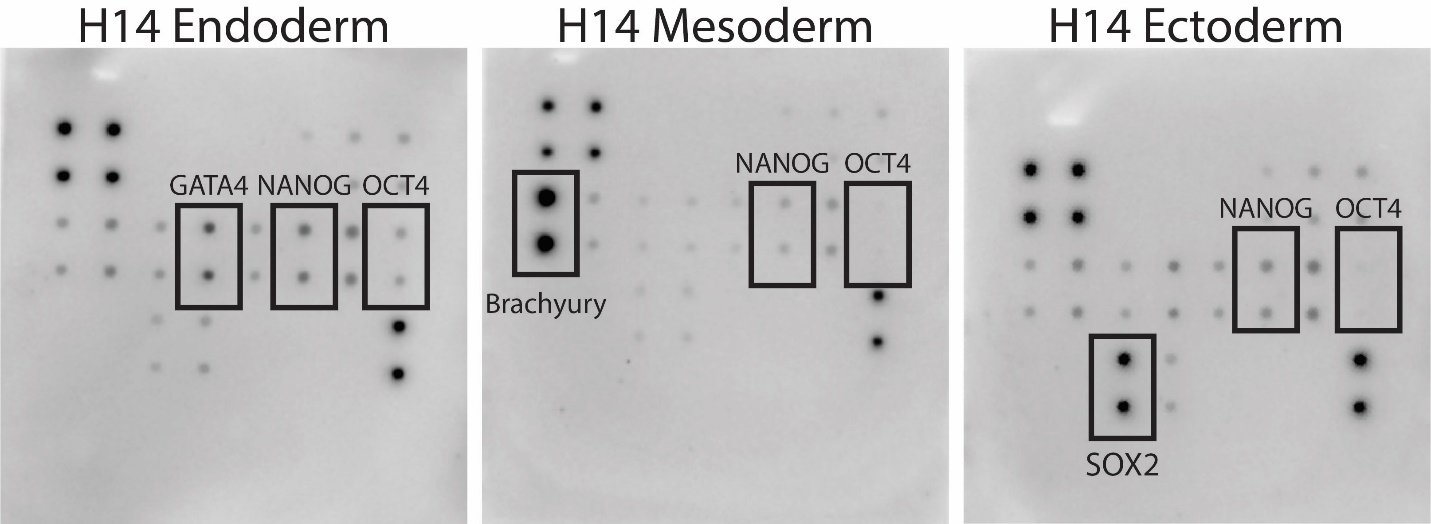
**

**Figure S4. Additional validation of stem cell pluripotency by trilineage differentiation.**

**
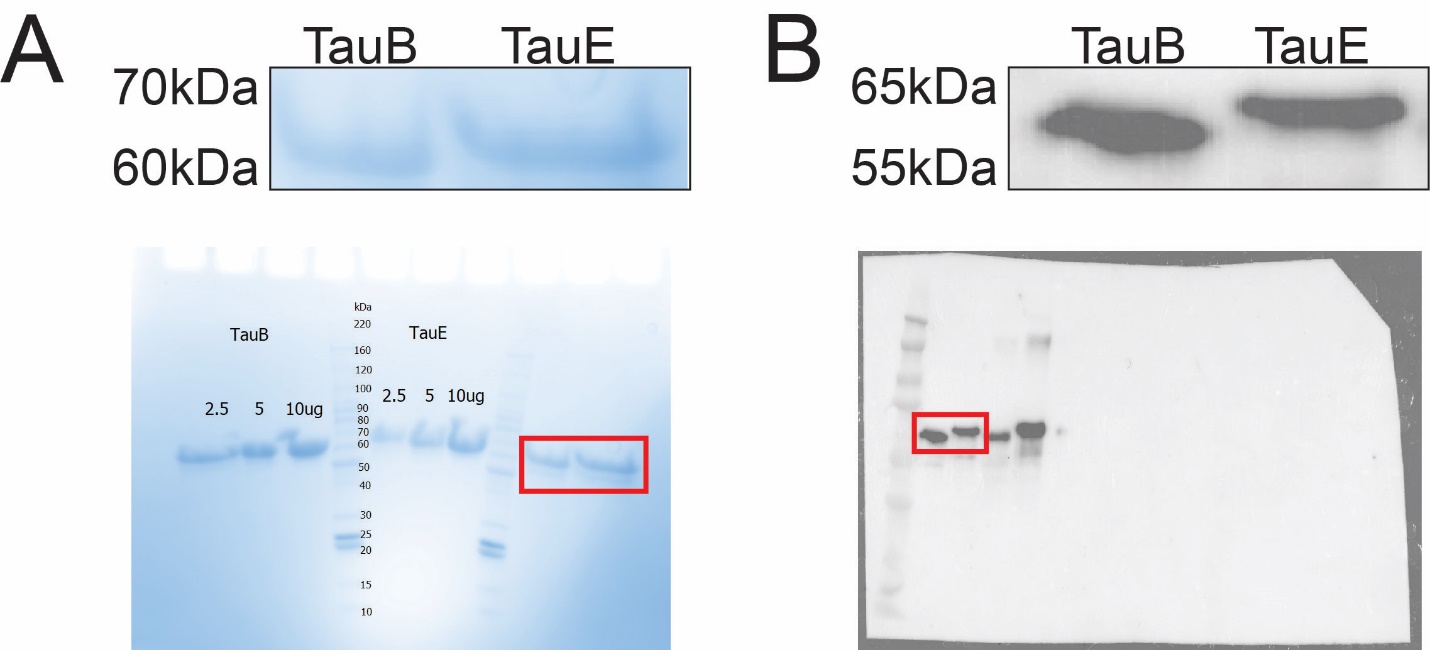
**

**Figure S5. Validation of recombinant tau.** (A) Recombinant TauE (1N4R) and TauB (1N3R) was run on an SDS-PAGE gel and stained with Coomassie Blue to assess for purity. Red box on whole gel represents magnified region shown above. (B) TauE and TauB were run on an SDS-PAGE gel, transferred to PVDF membrane and probed with anti-tau (HT7). Red box indicates relevant area magnified above

**
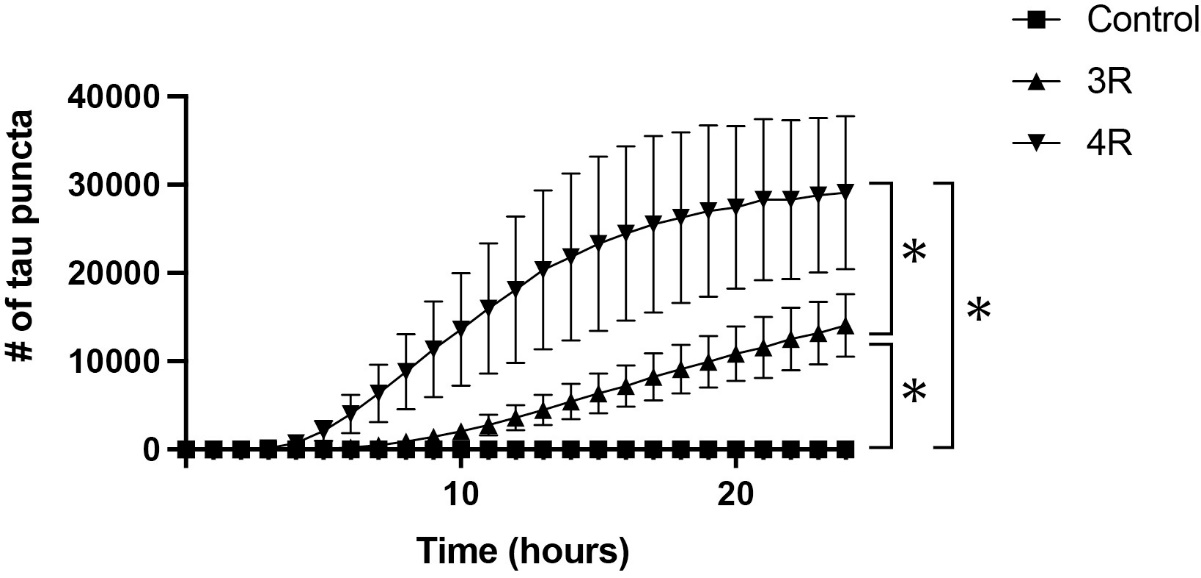
**

**Figure S6. Replication of Figure 3**. N=3 technical replicates per condition; *p<10-4
