# Supplementary material for: Determinants of astrocytic pathology in stem cell models of primary tauopathies
Source: Acta Neuropathol Commun. 2023 Oct 6;11:161. doi: 10.1186/s40478-023-01655-1 (PMC10557325; doi:10.1186/s40478-023-01655-1)
Supplement: Supplementary file 2 — Supplementary Material 2: Table S1. List of all genes for Figure 4. [file 40478_2023_1655_MOESM2_ESM.xlsx]

## Sheet: Table S1
Ensembl_gene_ID	log2FC_3RvCON	padj_3RvCON	log2FC_4RvCON	padj_4RvCON	log2FC_4Rv3R	padj_4Rv3R	hgnc_symbol
ENSG00000000003	0.180554	0.636575	0.0683434	0.93482	-0.112211	1	TSPAN6
ENSG00000000005	0.345448	0.893038	1.73923	NA	1.39378	1	TNMD
ENSG00000000419	-0.164102	0.760378	-0.120418	0.895196	0.0436842	1	DPM1
ENSG00000000457	-0.150516	0.765361	-0.18337	0.809946	-0.0328531	1	SCYL3
ENSG00000000460	-0.0956639	0.858497	0.143614	0.84061	0.239278	1	C1orf112
ENSG00000000938	-1.32405	NA	-1.4616	NA	-0.137549	1	FGR			3R vs. Con	4R vs. Con	4R vs. 3R
ENSG00000000971	-2.21652	0.142623	-0.803262	0.829504	1.41326	1	CFH		Total Differentially Expressed	74	30	0
ENSG00000001036	0.0903284	0.783097	0.0997865	0.84061	0.00945808	1	FUCA2		Differentially Expressed (Up)	41	0	0
ENSG00000001084	-0.263585	0.583405	-0.0876581	0.935263	0.175927	1	GCLC		Differentially Expressed (Down)	33	30	0
ENSG00000001167	-0.245079	0.581011	-0.28964	0.693113	-0.044561	1	NFYA		At least 2-fold	60	6	0
ENSG00000001460	0.0428877	0.951914	0.0887543	0.920043	0.0458666	1	STPG1		At least 2-fold (Up)	36	0	0
ENSG00000001461	0.160317	0.79523	-0.0123723	0.990685	-0.172689	1	NIPAL3		At least 2-fold (Down)	24	6	0
ENSG00000001497	-0.152039	0.753526	0.00497428	0.996419	0.157014	1	LAS1L
ENSG00000001561	0.296695	0.717562	0.387443	0.758696	0.0907482	1	ENPP4
ENSG00000001617	-0.605512	0.652195	-0.245863	NA	0.359649	1	SEMA3F
ENSG00000001626	2.93868	NA	0.42969	NA	-2.50899	1	CFTR
ENSG00000001629	-0.00695145	0.993351	-0.136033	0.872412	-0.129081	1	ANKIB1
ENSG00000001630	0.0808825	0.935696	-0.190114	0.876673	-0.270997	1	CYP51A1
ENSG00000001631	-0.0747704	0.894259	0.0831855	0.922482	0.157956	1	KRIT1
ENSG00000002016	-0.177044	0.826518	-0.226678	0.841975	-0.0496343	1	RAD52
ENSG00000002079	-1.77052	0.331352	-0.754387	NA	1.01613	1	MYH16
ENSG00000002330	0.425023	0.359515	0.275091	0.775738	-0.149932	1	BAD
ENSG00000002549	-0.179936	0.698791	-0.00505859	0.996419	0.174877	1	LAP3
ENSG00000002586	0.0120002	0.988772	-0.0712133	0.943504	-0.0832134	1	CD99
ENSG00000002587	-0.866188	0.631246	-0.523591	0.883371	0.342596	1	HS3ST1
ENSG00000002726	-8.2326	NA	-1.25962	NA	6.97297	NA	AOC1
ENSG00000002745	-1.42238	NA	0	NA	0.751241	1	WNT16
ENSG00000002746	0.147324	0.872375	-0.104218	0.944233	-0.251542	1	HECW1
ENSG00000002822	0.0507041	0.924196	-0.0549159	0.946135	-0.10562	1	MAD1L1
ENSG00000002834	-0.0678949	0.900069	-0.0122862	0.989698	0.0556087	1	LASP1
ENSG00000002919	0.0639518	0.931725	-0.00332473	0.997832	-0.0672765	1	SNX11
ENSG00000002933	-2.34031	0.196956	0.286568	NA	2.62688	0.791175	TMEM176A
ENSG00000003056	0.0243681	0.961456	-0.0219663	0.976529	-0.0463344	1	M6PR
ENSG00000003096	0.141321	0.83474	0.0673624	0.9607	-0.0739587	1	KLHL13
ENSG00000003137	0.445598	0.863851	0.141048	NA	-0.304551	1	CYP26B1
ENSG00000003147	-2.66599	0.0530962	-0.614883	0.880632	2.05111	0.822631	ICA1
ENSG00000003249	0.22158	0.672755	0.211382	0.812656	-0.0101977	1	DBNDD1
ENSG00000003393	-0.158192	0.792779	-0.121484	0.903163	0.0367081	1	ALS2
ENSG00000003400	-8.10066	NA	-3.39156	NA	4.7091	NA	CASP10
ENSG00000003402	-0.874388	0.19847	-0.307563	0.858151	0.566826	1	CFLAR
ENSG00000003436	-0.450502	0.61551	-0.31139	0.857217	0.139112	1	TFPI
ENSG00000003509	-0.0562956	0.942589	0.035258	0.976529	0.0915536	1	NDUFAF7
ENSG00000003756	-0.312958	0.555173	-0.0460539	0.973233	0.266904	1	RBM5
ENSG00000003987	0.225456	0.865609	0.175286	0.934122	-0.0501702	1	MTMR7
ENSG00000003989	-2.00682	0.100748	-0.751814	0.806637	1.25501	1	SLC7A2
ENSG00000004059	0.239019	0.557694	0.272703	0.693113	0.0336842	1	ARF5
ENSG00000004139	0.0801391	0.883659	0.165522	0.812656	0.0853826	1	SARM1
ENSG00000004142	0.116791	0.761364	0.151298	0.793719	0.0345073	1	POLDIP2
ENSG00000004399	-0.42412	0.452865	-0.227227	0.846975	0.196894	1	PLXND1
ENSG00000004455	-0.170043	0.654332	0.0737153	0.926833	0.243759	1	AK2
ENSG00000004468	0.0857777	0.982518	0.0244883	NA	-0.0612894	1	CD38
ENSG00000004478	-0.163233	0.792779	-0.0411299	0.973233	0.122104	1	FKBP4
ENSG00000004487	0.0814144	0.862139	0.00121838	0.998176	-0.080196	1	KDM1A
ENSG00000004534	-0.236473	0.627422	-0.142412	0.882955	0.0940617	1	RBM6
ENSG00000004660	0.0895055	0.919644	0.0414935	0.97725	-0.048012	1	CAMKK1
ENSG00000004700	-0.218155	0.685607	-0.281985	0.742932	-0.0638304	1	RECQL
ENSG00000004766	-0.0960848	0.868075	-0.113417	0.889761	-0.017332	1	VPS50
ENSG00000004776	-0.261152	0.942436	0.114383	NA	0.375535	1	HSPB6
ENSG00000004777	0.213665	0.699738	0.324799	0.695297	0.111134	1	ARHGAP33
ENSG00000004779	0.0436704	0.942532	0.351482	0.413174	0.307812	1	NDUFAB1
ENSG00000004799	-0.202737	0.909586	0.201214	0.942512	0.403951	1	PDK4
ENSG00000004809	-2.35765	NA	0.290647	NA	2.64829	1	SLC22A16
ENSG00000004838	1.087	0.234976	0.639577	0.747995	-0.447425	1	ZMYND10
ENSG00000004846	-4.2988	NA	-2.37998	NA	1.91881	1	ABCB5
ENSG00000004848	-1.72187	0.69288	2.73316	NA	4.45504	1	ARX
ENSG00000004864	0.133608	0.694421	0.102763	0.866659	-0.0308446	1	SLC25A13
ENSG00000004866	-0.255974	0.6827	0.0313726	0.985168	0.287346	1	ST7
ENSG00000004897	-0.242761	0.668417	-0.219849	0.822445	0.0229119	1	CDC27
ENSG00000004939	0	NA	0	NA	0	1	SLC4A1
ENSG00000004948	-0.351557	NA	1.422	NA	1.77356	1	CALCR
ENSG00000004961	-0.192954	0.751582	0.113887	0.918675	0.306841	1	HCCS
ENSG00000004975	0.130276	0.810898	0.0437018	0.970399	-0.0865739	1	DVL2
ENSG00000005001	-8.18584	NA	-2.50637	NA	5.67947	NA	PRSS22
ENSG00000005007	0.216698	0.600098	0.01333	0.989762	-0.203368	1	UPF1
ENSG00000005020	-1.72757	0.0947002	-0.410151	0.889672	1.31742	1	SKAP2
ENSG00000005022	0.0120072	0.989018	0.200285	0.80256	0.188278	1	SLC25A5
ENSG00000005059	0.571953	0.233147	0.478609	0.583057	-0.0933443	1	MCUB
ENSG00000005073	-1.42236	NA	0	NA	0.751217	1	HOXA11
ENSG00000005075	0.11054	0.889351	0.119188	0.920043	0.00864758	1	POLR2J
ENSG00000005100	-0.268099	0.322402	-0.149534	0.796702	0.118564	1	DHX33
ENSG00000005102	-0.614347	0.877379	0.397195	NA	1.01154	1	MEOX1
ENSG00000005108	-0.368014	0.600208	-0.0636817	0.971337	0.304333	1	THSD7A
ENSG00000005156	0.0416359	0.943245	-0.00916358	0.990685	-0.0507995	1	LIG3
ENSG00000005175	-0.0714587	0.90364	-0.118051	0.884419	-0.046592	1	RPAP3
ENSG00000005187	-2.88045	0.152642	1.72673	NA	4.60718	0.26022	ACSM3
ENSG00000005189	-0.1075	0.943832	0.330982	0.851168	0.438483	1	REXO5
ENSG00000005194	0.11652	0.825036	0.0919728	0.911493	-0.0245471	1	CIAPIN1
ENSG00000005206	0.0455317	0.965422	0.167028	0.894504	0.121496	1	SPPL2B
ENSG00000005238	0.149812	0.739059	0.192184	0.780856	0.0423723	1	ATOSB
ENSG00000005243	-0.0156374	0.994688	0.0831825	NA	0.0988198	1	COPZ2
ENSG00000005249	0.126155	0.83661	-0.0376426	0.973233	-0.163798	1	PRKAR2B
ENSG00000005302	-0.014838	0.978446	0.025152	0.973233	0.03999	1	MSL3
ENSG00000005339	-0.0674729	0.946906	-0.321341	0.75327	-0.253868	1	CREBBP
ENSG00000005379	0.43285	0.608915	0.313341	0.84061	-0.119509	1	TSPOAP1
ENSG00000005381	-4.10313	NA	0	NA	3.43199	1	MPO
ENSG00000005421	-0.710501	NA	1.42736	NA	2.13786	1	PON1
ENSG00000005436	-0.0247197	0.97653	-0.0533478	0.968777	-0.0286281	1	GCFC2
ENSG00000005448	0.370021	0.517795	0.294081	0.791368	-0.0759402	1	WDR54
ENSG00000005469	0.23416	0.687535	0.0432351	0.973807	-0.190924	1	CROT
ENSG00000005471	-0.642861	0.833764	-0.348328	NA	0.294533	1	ABCB4
ENSG00000005483	0.015298	0.985805	-0.211052	0.797464	-0.22635	1	KMT2E
ENSG00000005486	0.415486	0.334263	0.357319	0.661355	-0.0581669	1	RHBDD2
ENSG00000005513	1.32689	0.0295232	0.75821	0.545238	-0.568685	1	SOX8
ENSG00000005700	-0.143803	0.788428	-0.130576	0.880822	0.0132273	1	IBTK
ENSG00000005801	-0.154333	0.663166	0.0024189	0.997832	0.156752	1	ZNF195
ENSG00000005810	-0.300854	0.614254	-0.544045	0.44089	-0.243191	1	MYCBP2
ENSG00000005812	0.054219	0.940191	-0.123796	0.888866	-0.178015	1	FBXL3
ENSG00000005844	-0.528575	0.93608	0.337134	NA	0.865709	1	ITGAL
ENSG00000005882	0.0882027	0.879021	0.131843	0.872456	0.04364	1	PDK2
ENSG00000005884	-0.460331	0.405805	-0.0748968	0.964615	0.385434	1	ITGA3
ENSG00000005889	-0.0799403	0.912108	-0.151516	0.876839	-0.0715761	1	ZFX
ENSG00000005893	-0.0157944	0.982405	-0.0719907	0.93482	-0.0561963	1	LAMP2
ENSG00000005961	0.241073	0.930246	-0.119082	NA	-0.360155	1	ITGA2B
ENSG00000005981	0.375217	0.87689	0.775335	NA	0.400118	1	ASB4
ENSG00000006007	0.172133	0.588201	0.139468	0.808978	-0.0326653	1	GDE1
ENSG00000006015	0.177101	0.723399	0.331271	0.620918	0.154169	1	REX1BD
ENSG00000006016	0.542001	0.805731	1.36806	0.583777	0.826059	1	CRLF1
ENSG00000006025	-0.457648	0.541099	-0.0281027	0.989315	0.429545	1	OSBPL7
ENSG00000006042	-0.0108078	0.987917	-0.0110215	0.990239	-0.000213711	1	TMEM98
ENSG00000006047	0.485368	0.738753	0.336199	NA	-0.149169	1	YBX2
ENSG00000006059	NA	NA	NA	NA	NA	NA	KRT33A
ENSG00000006062	-0.553708	0.571565	-0.803351	0.552874	-0.249643	1	MAP3K14
ENSG00000006071	1.05047	0.552972	0.344402	0.92704	-0.706066	1	ABCC8
ENSG00000006116	1.34802	NA	1.13753	NA	0	1	CACNG3
ENSG00000006118	0.228537	0.725193	0.0426904	0.976405	-0.185847	1	TMEM132A
ENSG00000006125	-0.192162	0.788039	-0.0461212	0.973772	0.14604	1	AP2B1
ENSG00000006128	0.235698	0.893038	0.278443	NA	0.0427443	1	TAC1
ENSG00000006194	0.0383802	0.950141	-0.0608532	0.939309	-0.0992334	1	ZNF263
ENSG00000006210	-0.119896	0.864361	-0.0927487	0.932933	0.0271474	1	CX3CL1
ENSG00000006282	-0.226099	0.636584	0.144025	0.879303	0.370124	1	SPATA20
ENSG00000006283	0.436564	0.478325	-0.130697	0.928454	-0.567261	1	CACNA1G
ENSG00000006327	-0.0761827	0.936478	0.168305	0.885925	0.244488	1	TNFRSF12A
ENSG00000006377	0.501149	NA	-1.9747	NA	-2.47585	1	DLX6
ENSG00000006432	0.0304118	0.979994	-0.256129	0.838916	-0.286541	1	MAP3K9
ENSG00000006451	-0.262236	0.622448	-0.168852	0.872412	0.093384	1	RALA
ENSG00000006453	-2.04077	0.0296089	-0.590067	0.822445	1.45071	0.857341	BAIAP2L1
ENSG00000006459	-0.692839	0.0189783	-0.512321	0.24359	0.180518	1	KDM7A
ENSG00000006468	-0.103023	0.888235	-0.149527	0.884358	-0.0465041	1	ETV1
ENSG00000006530	-0.192273	0.67847	0.113574	0.89877	0.305847	1	AGK
ENSG00000006534	-2.6413	NA	-0.107071	NA	2.53423	NA	ALDH3B1
ENSG00000006555	-7.04497	0.522096	0	NA	6.37383	1	TTC22
ENSG00000006576	-0.255638	0.711133	-0.257178	0.819823	-0.0015397	1	PHTF2
ENSG00000006606	-4.97087	0.163655	-4.69674	NA	0.274129	1	CCL26
ENSG00000006607	-0.0277162	0.965422	-0.00515614	0.995557	0.0225601	1	FARP2
ENSG00000006611	-4.68215	NA	0.290649	NA	4.9728	1	USH1C
ENSG00000006625	0.191174	0.675062	0.14058	0.867181	-0.0505939	1	GGCT
ENSG00000006634	-0.230756	0.756481	-0.110633	0.935263	0.120122	1	DBF4
ENSG00000006638	-1.50795	0.741501	-0.648152	NA	0.859793	1	TBXA2R
ENSG00000006652	-0.154437	0.716007	-0.0442285	0.965278	0.110208	1	IFRD1
ENSG00000006659	1.34801	NA	1.13753	NA	0	1	LGALS14
ENSG00000006695	-0.250082	0.527939	-0.0651332	0.948309	0.184948	1	COX10
ENSG00000006704	0.0459708	0.949005	0.0736037	0.936266	0.0276328	1	GTF2IRD1
ENSG00000006712	0.0199799	0.972488	0.0279801	0.973233	0.00800025	1	PAF1
ENSG00000006715	-0.10458	0.814914	-0.225802	0.686384	-0.121222	1	VPS41
ENSG00000006740	0.294034	0.763571	-0.0162311	0.994229	-0.310265	1	ARHGAP44
ENSG00000006744	0.0648313	0.895353	0.0856956	0.903542	0.0208643	1	ELAC2
ENSG00000006747	-0.666358	0.709711	0.366152	NA	1.03251	1	SCIN
ENSG00000006756	-0.00197422	0.998155	-0.0631162	0.960199	-0.061142	1	ARSD
ENSG00000006757	-0.0784545	0.959436	0.622787	0.681054	0.701241	1	PNPLA4
ENSG00000006788	NA	NA	NA	NA	NA	NA	MYH13
ENSG00000006831	-0.171504	0.613671	-0.175752	0.765091	-0.00424747	1	ADIPOR2
ENSG00000006837	-0.334444	0.817108	-0.18654	NA	0.147904	1	CDKL3
ENSG00000007001	0.746018	0.84915	0.479378	NA	-0.26664	1	UPP2
ENSG00000007038	NA	NA	NA	NA	NA	NA	PRSS21
ENSG00000007047	0.0877082	0.864203	0.0654563	0.935263	-0.0222518	1	MARK4
ENSG00000007062	0.545166	0.433077	0.336143	0.810499	-0.209023	1	PROM1
ENSG00000007080	0.0369984	0.962699	0.0220831	0.987692	-0.0149154	1	CCDC124
ENSG00000007129	-0.839923	0.88511	-0.845696	NA	-0.00577329	1	CEACAM21
ENSG00000007168	0.0295689	0.961892	-0.0777323	0.921211	-0.107301	1	PAFAH1B1
ENSG00000007171	-0.0873607	0.962688	-0.2466	0.915726	-0.15924	1	NOS2
ENSG00000007174	0.675822	0.284339	0.174848	0.91372	-0.500974	1	DNAH9
ENSG00000007202	-0.0768972	0.864203	-0.137546	0.808846	-0.060649	1	BLTP2
ENSG00000007216	NA	NA	NA	NA	NA	NA	SLC13A2
ENSG00000007237	0.228671	0.689166	0.158511	0.88157	-0.07016	1	GAS7
ENSG00000007255	0.446434	0.614254	0.300397	0.86152	-0.146037	1	TRAPPC6A
ENSG00000007264	0.588212	0.792779	0.895365	NA	0.307152	1	MATK
ENSG00000007306	-3.77672	NA	0	NA	3.10558	1	CEACAM7
ENSG00000007312	0.0201355	NA	0.278844	NA	0.258708	1	CD79B
ENSG00000007314	-1.72879	0.618801	-0.607215	NA	1.12158	1	SCN4A
ENSG00000007341	0.0487782	0.942005	0.0327775	0.973807	-0.0160007	1	ST7L
ENSG00000007350	0.745494	0.600026	0.666536	NA	-0.0789572	1	TKTL1
ENSG00000007372	0.243373	0.495427	0.00626416	0.994896	-0.237109	1	PAX6
ENSG00000007376	0.125955	0.913168	0.274721	0.851225	0.148765	1	RPUSD1
ENSG00000007384	-0.239034	0.679411	0.0775091	0.955118	0.316543	1	RHBDF1
ENSG00000007392	-0.182098	0.789135	-0.0225035	0.988674	0.159595	1	LUC7L
ENSG00000007402	0.638116	0.33562	0.163006	0.925359	-0.47511	1	CACNA2D2
ENSG00000007516	0.74568	0.647515	0.589867	0.84061	-0.155813	1	BAIAP3
ENSG00000007520	0.477969	0.206034	0.463741	0.413174	-0.0142277	1	TSR3
ENSG00000007541	0.366802	0.430165	0.375441	0.638361	0.00863921	1	PIGQ
ENSG00000007545	-0.287702	0.694421	-0.142027	0.921928	0.145675	1	CRAMP1
ENSG00000007866	-0.0893897	0.884336	-0.157813	0.844433	-0.0684229	1	TEAD3
ENSG00000007908	0.0875267	0.956268	-0.128687	0.955486	-0.216214	1	SELE
ENSG00000007923	-0.129448	0.812023	-0.0897855	0.921155	0.0396622	1	DNAJC11
ENSG00000007933	0	NA	0	NA	0	1	FMO3
ENSG00000007944	0.323317	0.618761	0.049768	0.975691	-0.273549	1	MYLIP
ENSG00000007952	-0.519854	0.798458	-0.356986	NA	0.162869	1	NOX1
ENSG00000007968	0.311534	0.66808	0.215255	0.875951	-0.0962794	1	E2F2
ENSG00000008018	-0.00333793	0.996751	0.192967	0.776141	0.196305	1	PSMB1
ENSG00000008056	0.577941	0.434826	0.395562	0.791791	-0.182379	1	SYN1
ENSG00000008083	0.11699	0.874234	-0.163743	0.875613	-0.280732	1	JARID2
ENSG00000008086	0.0809625	0.943245	-0.232637	0.863399	-0.3136	1	CDKL5
ENSG00000008118	-0.173869	0.895794	-0.205005	0.917292	-0.0311367	1	CAMK1G
ENSG00000008128	-0.152864	0.954159	0.30866	NA	0.461523	1	CDK11A
ENSG00000008130	0.0714788	0.90908	0.079743	0.932498	0.00826416	1	NADK
ENSG00000008196	0.695495	0.688469	0.857035	NA	0.16154	1	TFAP2B
ENSG00000008197	NA	NA	NA	NA	NA	NA	TFAP2D
ENSG00000008226	-2.0546	0.45903	0.664372	NA	2.71898	1	DLEC1
ENSG00000008256	-0.0196159	0.973715	0.0104703	0.990239	0.0300862	1	CYTH3
ENSG00000008277	0.12027	0.894604	-0.33644	0.754066	-0.45671	1	ADAM22
ENSG00000008282	-0.326757	0.472211	-0.156881	0.875951	0.169875	1	SYPL1
ENSG00000008283	0.266439	0.791691	0.250767	0.876839	-0.0156724	1	CYB561
ENSG00000008294	0.0376859	0.959417	-0.179544	0.812656	-0.21723	1	SPAG9
ENSG00000008300	0.302256	0.564211	0.0215794	0.988674	-0.280676	1	CELSR3
ENSG00000008311	-0.135638	0.86444	-0.309179	0.74955	-0.173541	1	AASS
ENSG00000008323	-1.85816	0.35312	-0.211815	NA	1.64634	1	PLEKHG6
ENSG00000008324	-0.117041	0.870302	-0.0753964	0.949907	0.0416442	1	SS18L2
ENSG00000008382	0.244823	0.763718	0.159308	0.90993	-0.0855152	1	MPND
ENSG00000008394	0.131055	0.893038	0.287795	0.812656	0.15674	1	MGST1
ENSG00000008405	0.151333	0.639477	0.126303	0.824281	-0.0250302	1	CRY1
ENSG00000008438	-3.77586	NA	-2.93368	NA	0.842185	1	PGLYRP1
ENSG00000008441	0.336753	0.459384	0.179271	0.85097	-0.157482	1	NFIX
ENSG00000008513	-0.541084	0.328081	-0.515497	0.585516	0.0255869	1	ST3GAL1
ENSG00000008516	-0.163981	0.936142	0.0509065	0.988674	0.214887	1	MMP25
ENSG00000008517	-4.11096	NA	0.277799	NA	4.38876	NA	IL32
ENSG00000008710	0.0048308	0.996966	-0.0440014	0.976529	-0.0488322	1	PKD1
ENSG00000008735	0.661425	0.331352	0.488333	0.7224	-0.173092	1	MAPK8IP2
ENSG00000008838	0.0602293	0.907531	0.138051	0.829504	0.0778217	1	MED24
ENSG00000008853	0.0504445	0.943497	-0.104832	0.906964	-0.155276	1	RHOBTB2
ENSG00000008869	-0.0710405	0.893508	-0.0950142	0.90053	-0.0239738	1	HEATR5B
ENSG00000008952	0.0304401	0.959436	-0.137189	0.828042	-0.167629	1	SEC62
ENSG00000008988	0.14601	0.816975	0.305996	0.703036	0.159986	1	RPS20
ENSG00000009307	-0.0713147	0.912108	-0.0274291	0.981706	0.0438856	1	CSDE1
ENSG00000009335	-0.262579	0.608915	-0.145583	0.887493	0.116995	1	UBE3C
ENSG00000009413	-0.0770067	0.951994	-0.464219	0.703036	-0.387212	1	REV3L
ENSG00000009694	0.159193	0.905168	-0.143233	0.946901	-0.302426	1	TENM1
ENSG00000009709	-1.42236	NA	0	NA	0.751217	1	PAX7
ENSG00000009724	-0.0271883	0.992856	0.394951	NA	0.42214	1	MASP2
ENSG00000009765	NA	NA	NA	NA	NA	NA	IYD
ENSG00000009780	0.433059	0.308904	0.305215	0.729146	-0.127844	1	FAM76A
ENSG00000009790	-0.996392	0.74739	-1.61206	NA	-0.615666	1	TRAF3IP3
ENSG00000009830	0.147284	0.727067	0.00548696	0.995263	-0.141797	1	POMT2
ENSG00000009844	0.0404212	0.954159	0.0382288	0.970583	-0.00219239	1	VTA1
ENSG00000009950	-3.2756	NA	-0.0277729	NA	3.24783	1	MLXIPL
ENSG00000009954	-0.25158	0.643343	-0.4223	0.558788	-0.17072	1	BAZ1B
ENSG00000010017	0.0715475	0.883726	0.00999784	0.990239	-0.0615496	1	RANBP9
ENSG00000010030	-2.572	0.440188	-0.0284853	NA	2.54352	1	ETV7
ENSG00000010072	0.0486444	0.92609	-0.0118972	0.989315	-0.0605415	1	SPRTN
ENSG00000010165	-0.0579813	0.916069	-0.106144	0.885925	-0.0481629	1	METTL13
ENSG00000010219	-0.0558443	0.952102	0.278927	0.768214	0.334772	1	DYRK4
ENSG00000010244	-0.0720413	0.90396	0.0610918	0.949842	0.133133	1	ZNF207
ENSG00000010256	0.0249248	0.969771	0.199478	0.771558	0.174553	1	UQCRC1
ENSG00000010270	0.106867	0.743344	0.118016	0.816694	0.0111489	1	STARD3NL
ENSG00000010278	0.19257	0.833029	0.35883	0.762399	0.16626	1	CD9
ENSG00000010282	-1.42239	NA	0	NA	0.751246	1	HHATL
ENSG00000010292	-0.129998	0.843032	-0.136808	0.887493	-0.00681057	1	NCAPD2
ENSG00000010295	0.149074	0.792775	-0.0158606	0.989315	-0.164935	1	IFFO1
ENSG00000010310	-1.36816	0.659546	-0.148057	NA	1.2201	1	GIPR
ENSG00000010318	-0.423238	0.518132	-0.301165	0.812656	0.122073	1	PHF7
ENSG00000010319	-1.94039	NA	-0.449852	NA	1.49054	1	SEMA3G
ENSG00000010322	0.131002	0.719615	0.0459632	0.955372	-0.0850388	1	NISCH
ENSG00000010327	-0.632878	NA	2.77331	NA	3.40619	1	STAB1
ENSG00000010361	0.109281	0.872792	0.273312	0.743152	0.164031	1	FUZ
ENSG00000010379	-0.417356	NA	-1.49221	NA	-1.07486	1	SLC6A13
ENSG00000010404	0.119257	0.785201	0.0988433	0.889672	-0.0204138	1	IDS
ENSG00000010438	-4.05166	NA	-1.1328	NA	2.91887	1	PRSS3
ENSG00000010539	-9.67e-05	0.999793	0.0147971	0.989315	0.0148937	1	ZNF200
ENSG00000010610	1.06811	0.544046	0.210693	NA	-0.857418	1	CD4
ENSG00000010626	0.227478	0.844967	0.30087	0.852159	0.0733914	1	LRRC23
ENSG00000010671	-0.527708	0.933372	1.44943	NA	1.97714	1	BTK
ENSG00000010704	-1.38628	0.146186	-0.65043	0.776432	0.735855	1	HFE
ENSG00000010803	-0.0671038	0.920768	0.0825637	0.933742	0.149668	1	SCMH1
ENSG00000010810	0.367701	0.245429	0.102837	0.899398	-0.264864	1	FYN
ENSG00000010818	-0.245659	0.53187	-0.228708	0.749551	0.0169511	1	HIVEP2
ENSG00000010932	-0.310712	0.897762	0.860104	NA	1.17082	1	FMO1
ENSG00000011007	-0.128423	0.747975	-0.133142	0.830955	-0.00471883	1	ELOA
ENSG00000011009	0.0205001	0.981244	0.134328	0.890324	0.113828	1	LYPLA2
ENSG00000011021	0.224468	0.624506	0.175593	0.831157	-0.0488752	1	CLCN6
ENSG00000011028	0.26753	0.714134	-0.182161	0.889672	-0.449691	1	MRC2
ENSG00000011052	0.318207	0.822481	0.0995656	NA	-0.218641	1	NME1-NME2
ENSG00000011083	-3.35093	NA	0	NA	2.67978	1	SLC6A7
ENSG00000011105	0.0242455	0.969883	0.0379259	0.970583	0.0136804	1	TSPAN9
ENSG00000011114	-0.172998	0.743344	-0.228564	0.775787	-0.0555665	1	BTBD7
ENSG00000011132	-0.0129516	0.992856	0.184147	0.907096	0.197099	1	APBA3
ENSG00000011143	-0.0815202	0.903534	-0.0786867	0.939309	0.00283347	1	MKS1
ENSG00000011198	-0.272768	0.563181	-0.30055	0.714336	-0.0277827	1	ABHD5
ENSG00000011201	-0.171407	0.907998	-0.223927	0.917187	-0.0525198	1	ANOS1
ENSG00000011243	0.101215	0.804755	0.015849	0.987123	-0.0853661	1	AKAP8L
ENSG00000011258	0.0957468	0.895712	-0.120251	0.908403	-0.215998	1	MBTD1
ENSG00000011260	0.0271508	0.965938	0.0268834	0.97725	-0.000267393	1	UTP18
ENSG00000011275	-0.0499731	0.92175	-0.100014	0.88157	-0.0500405	1	RNF216
ENSG00000011295	0.263721	0.398758	0.179382	0.775787	-0.0843386	1	TTC19
ENSG00000011304	-0.0210226	0.974656	0.0776229	0.926806	0.0986455	1	PTBP1
ENSG00000011332	-0.190925	0.847013	-0.033943	0.987692	0.156982	1	DPF1
ENSG00000011347	0.0605974	0.968217	0.20196	0.917586	0.141363	1	SYT7
ENSG00000011376	-0.121981	0.831636	-0.122672	0.887493	-0.000691689	1	LARS2
ENSG00000011405	-0.154447	0.80146	-0.311408	0.693113	-0.15696	1	PIK3C2A
ENSG00000011422	-0.686865	0.602815	-0.316199	0.907562	0.370666	1	PLAUR
ENSG00000011426	-0.702571	0.322402	-0.537796	0.703036	0.164775	1	ANLN
ENSG00000011451	0.0499432	0.956082	-0.0134903	0.990685	-0.0634335	1	WIZ
ENSG00000011454	0.10283	0.84338	-0.15093	0.828042	-0.25376	1	RABGAP1
ENSG00000011465	0.354513	0.709711	-0.133917	0.946901	-0.48843	1	DCN
ENSG00000011478	-0.0379486	0.971569	-0.0230672	0.989315	0.0148813	1	QPCTL
ENSG00000011485	-0.00343938	0.996643	-0.0166373	0.988034	-0.0131979	1	PPP5C
ENSG00000011523	0.0868433	0.880721	0.0909902	0.916958	0.0041469	1	CEP68
ENSG00000011566	0.0294649	0.963582	-0.050856	0.9607	-0.0803209	1	MAP4K3
ENSG00000011590	-1.55721	0.573844	0.332168	NA	1.88938	1	ZBTB32
ENSG00000011600	-1.78764	NA	-0.671141	NA	1.1165	1	TYROBP
ENSG00000011638	-0.691932	0.33294	-0.19457	0.91372	0.497361	1	LDAF1
ENSG00000011677	-0.400907	0.75629	0.280989	0.901947	0.681896	1	GABRA3
ENSG00000012048	-0.267581	0.627559	-0.280758	0.768214	-0.0131767	1	BRCA1
ENSG00000012061	0.135259	0.728704	0.341691	0.368398	0.206432	1	ERCC1
ENSG00000012124	3.51811	NA	-0.256913	NA	-3.77502	1	CD22
ENSG00000012171	-3.31936	NA	0.265883	NA	3.58524	NA	SEMA3B
ENSG00000012174	-0.12604	0.85653	-0.0998969	0.926994	0.0261429	1	MBTPS2
ENSG00000012211	-0.851504	0.600098	0.224585	NA	1.07609	1	PRICKLE3
ENSG00000012223	0	NA	0	NA	0	1	LTF
ENSG00000012232	0.131189	0.785965	-0.0290355	0.976405	-0.160225	1	EXTL3
ENSG00000012504	-2.39259	NA	0.290647	NA	2.68324	1	NR1H4
ENSG00000012660	-0.0247192	0.976211	0.0126634	0.990685	0.0373826	1	ELOVL5
ENSG00000012779	-1.83876	NA	-0.729602	NA	1.10916	1	ALOX5
ENSG00000012817	0.171189	0.715158	-0.0249042	0.982578	-0.196093	1	KDM5D
ENSG00000012822	0.052161	0.962003	-0.00470217	0.997832	-0.0568631	1	CALCOCO1
ENSG00000012963	0.0239873	0.968217	0.0562268	0.946901	0.0322395	1	UBR7
ENSG00000012983	-0.388461	0.491939	-0.47541	0.588715	-0.0869486	1	MAP4K5
ENSG00000013016	-0.0594189	0.94682	-0.286398	0.749994	-0.226979	1	EHD3
ENSG00000013275	0.0451993	0.952289	0.101834	0.90916	0.0566344	1	PSMC4
ENSG00000013288	-0.0608814	0.937637	-0.14616	0.880191	-0.0852781	1	MAN2B2
ENSG00000013293	-0.166866	0.904962	-0.223751	0.911309	-0.0568847	1	SLC7A14
ENSG00000013297	-0.275565	0.897919	-0.624948	NA	-0.349383	1	CLDN11
ENSG00000013306	0.0878059	0.907722	0.333422	0.690324	0.245616	1	SLC25A39
ENSG00000013364	-0.517459	0.361939	-0.25813	0.831655	0.259329	1	MVP
ENSG00000013374	-0.131289	0.767545	0.0202893	0.984505	0.151578	1	NUB1
ENSG00000013375	0.0838324	0.884238	-0.0658534	0.943463	-0.149686	1	PGM3
ENSG00000013392	0.352617	0.46209	0.201519	0.838916	-0.151099	1	RWDD2A
ENSG00000013441	-1.24212	0.116146	-0.337237	0.876839	0.904882	1	CLK1
ENSG00000013503	-0.146068	0.796921	-0.0833916	0.93482	0.0626765	1	POLR3B
ENSG00000013523	0.0692954	0.890655	0.0585434	0.941411	-0.010752	1	ANGEL1
ENSG00000013561	-0.0380686	0.961298	-0.0871484	0.931226	-0.0490797	1	RNF14
ENSG00000013563	-0.0751388	0.920081	0.0972683	0.927841	0.172407	1	DNASE1L1
ENSG00000013573	-0.374522	0.497649	-0.0725221	0.96429	0.302	1	DDX11
ENSG00000013583	0.0650933	0.907925	0.297302	0.588715	0.232209	1	HEBP1
ENSG00000013588	-7.51876	NA	-0.233266	NA	7.2855	NA	GPRC5A
ENSG00000013619	-0.341388	0.740613	-0.272654	0.880632	0.0687334	1	MAMLD1
ENSG00000013725	-0.751801	0.640271	-0.743862	NA	0.0079388	1	CD6
ENSG00000013810	-0.114085	0.878716	-0.0982088	0.932933	0.0158766	1	TACC3
ENSG00000014123	-0.145616	0.831784	-0.147009	0.887493	-0.00139363	1	UFL1
ENSG00000014138	-0.058805	0.936142	0.1371	0.880632	0.195905	1	POLA2
ENSG00000014164	-0.0375039	0.960651	0.142084	0.872906	0.179588	1	ZC3H3
ENSG00000014216	-0.0352907	0.960218	0.106551	0.89877	0.141842	1	CAPN1
ENSG00000014257	-5.41472	0.183965	1.15556	NA	6.57028	0.616285	ACP3
ENSG00000014641	0.0526802	0.933372	0.138187	0.849463	0.085507	1	MDH1
ENSG00000014824	-0.0701493	0.884454	-0.0313472	0.970583	0.038802	1	SLC30A9
ENSG00000014914	-0.0368713	0.970055	0.11101	0.932024	0.147881	1	MTMR11
ENSG00000014919	-0.0408663	0.949005	0.0693138	0.933969	0.11018	1	COX15
ENSG00000015133	-0.351551	0.757179	0.0790043	0.973233	0.430555	1	CCDC88C
ENSG00000015153	0.121707	0.794794	0.178553	0.793719	0.0568453	1	YAF2
ENSG00000015171	-0.0750072	0.881012	-0.132527	0.84061	-0.0575203	1	ZMYND11
ENSG00000015285	0.244952	0.907531	0.222348	NA	-0.0226037	1	WAS
ENSG00000015413	-2.59427	NA	0	NA	1.92313	1	DPEP1
ENSG00000015475	-0.129662	0.86444	-0.00261229	0.998176	0.12705	1	BID
ENSG00000015479	-1.01297	0.548074	-0.553075	0.876981	0.459894	1	MATR3
ENSG00000015520	0.286629	0.933372	1.3445	NA	1.05787	1	NPC1L1
ENSG00000015532	-0.0419817	0.953843	-0.235752	0.738172	-0.193771	1	XYLT2
ENSG00000015568	-0.292268	0.878979	-0.582822	NA	-0.290554	1	RGPD5
ENSG00000015592	1.23181	0.123754	0.803712	0.622635	-0.428101	1	STMN4
ENSG00000015676	-0.112651	0.801312	-0.0256117	0.976529	0.0870389	1	NUDCD3
ENSG00000016082	1.25414	0.834623	-0.320348	NA	-1.57449	1	ISL1
ENSG00000016391	-0.00489251	0.998079	0.244532	0.875951	0.249425	1	CHDH
ENSG00000016402	0.582592	0.648684	0.357998	NA	-0.224594	1	IL20RA
ENSG00000016490	NA	NA	NA	NA	NA	NA	CLCA1
ENSG00000016602	-1.42238	NA	-1.63293	NA	-0.210552	1	CLCA4
ENSG00000016864	0.033481	0.966832	0.0361184	0.976405	0.00263749	1	GLT8D1
ENSG00000017260	-0.201527	0.750219	-0.301472	0.744699	-0.0999453	1	ATP2C1
ENSG00000017427	-3.6485	NA	0	NA	2.97736	1	IGF1
ENSG00000017483	-0.14167	0.924448	0.736645	0.620918	0.878316	1	SLC38A5
ENSG00000017797	-0.124691	0.790114	-0.194619	0.768214	-0.0699276	1	RALBP1
ENSG00000018189	0.352844	0.519858	0.100445	0.938626	-0.252399	1	RUFY3
ENSG00000018236	-0.0615749	0.963637	-0.0603257	0.976405	0.00124921	1	CNTN1
ENSG00000018280	-2.31944	NA	0.0402925	NA	2.35973	1	SLC11A1
ENSG00000018408	-0.182027	0.842445	-0.186883	0.889672	-0.00485612	1	WWTR1
ENSG00000018510	-0.0294849	0.961399	-0.144223	0.828042	-0.114738	1	AGPS
ENSG00000018607	1.01053	NA	-0.207277	NA	-1.2178	1	NA
ENSG00000018610	-0.00634737	0.993795	0.215473	0.75327	0.221821	1	STEEP1
ENSG00000018625	0.600533	0.271717	0.0691451	0.970583	-0.531388	1	ATP1A2
ENSG00000018699	-0.22137	0.716007	0.0253431	0.987692	0.246713	1	TTC27
ENSG00000018869	-0.00551564	0.997169	0.285979	0.8242	0.291495	1	ZNF582
ENSG00000019102	-0.316774	0.960847	-0.109547	NA	0.207227	1	VSIG2
ENSG00000019144	0.069337	0.878952	0.108454	0.864565	0.0391171	1	PHLDB1
ENSG00000019169	-3.2186	NA	-1.97262	NA	1.24598	1	MARCO
ENSG00000019186	-4.57921	0.111206	-2.34766	NA	2.23155	1	CYP24A1
ENSG00000019485	0.00288047	0.998155	-0.139133	0.90922	-0.142013	1	PRDM11
ENSG00000019505	-0.136859	0.89633	0.00421653	0.998176	0.141076	1	SYT13
ENSG00000019549	-0.604971	0.456338	-0.354161	0.829504	0.25081	1	SNAI2
ENSG00000019582	-1.03503	0.479196	-0.245852	0.948309	0.78918	1	CD74
ENSG00000019991	-0.182761	NA	-1.04518	NA	-0.862416	1	HGF
ENSG00000019995	0.0721098	0.920768	-0.057481	0.96429	-0.129591	1	ZRANB1
ENSG00000020129	0.292048	0.522215	0.200635	0.822323	-0.0914133	1	NCDN
ENSG00000020181	-0.707536	0.474913	-0.548116	0.775787	0.15942	1	ADGRA2
ENSG00000020219	-2.29463	NA	1.13736	NA	3.43199	1	CCT8L1P
ENSG00000020256	-0.0106771	0.991143	-0.0497742	0.970399	-0.0390971	1	ZFP64
ENSG00000020426	-0.341757	0.429057	-0.239776	0.781587	0.101981	1	MNAT1
ENSG00000020577	0.00268303	0.998079	-0.0987831	0.926791	-0.101466	1	SAMD4A
ENSG00000020633	0.311236	NA	-0.337215	NA	-0.648451	1	RUNX3
ENSG00000020922	-0.15164	0.792779	-0.140136	0.88157	0.0115041	1	MRE11
ENSG00000021300	0.604401	0.398758	0.338854	0.821057	-0.265547	1	PLEKHB1
ENSG00000021355	-4.06084	NA	-0.225277	NA	3.83556	NA	SERPINB1
ENSG00000021461	1.49528	NA	1.28479	NA	0	1	CYP3A43
ENSG00000021488	-0.0102943	0.998669	0.439257	NA	0.449551	1	SLC7A9
ENSG00000021574	0.106215	0.880916	-0.0455546	0.97076	-0.15177	1	SPAST
ENSG00000021645	0.514013	0.446947	0.216945	0.885925	-0.297069	1	NRXN3
ENSG00000021762	-0.20698	0.725514	0.0388847	0.976405	0.245865	1	OSBPL5
ENSG00000021776	-0.138452	0.840201	-0.137756	0.892565	0.000696269	1	AQR
ENSG00000021826	-0.385102	0.338147	-0.287907	0.725324	0.0971957	1	CPS1
ENSG00000021852	0.777982	NA	0.563143	NA	-0.214839	1	C8B
ENSG00000022267	-0.159439	0.865815	0.00379842	0.998176	0.163238	1	FHL1
ENSG00000022277	0.0724623	0.878459	0.11157	0.866008	0.0391077	1	RTF2
ENSG00000022355	-0.0314578	0.995567	2.52363	NA	2.55509	1	GABRA1
ENSG00000022556	-0.0437496	0.963149	-0.074659	0.9607	-0.0309094	1	NLRP2
ENSG00000022567	-0.163056	0.758193	-0.271803	0.719019	-0.108747	1	SLC45A4
ENSG00000022840	0.201687	0.353046	0.202402	0.581323	0.000714814	1	RNF10
ENSG00000022976	-0.366767	0.550618	0.00309745	0.998176	0.369865	1	ZNF839
ENSG00000023041	-0.202238	0.648674	-0.103217	0.907209	0.099021	1	ZDHHC6
ENSG00000023171	0.0465077	0.95844	-0.0865299	0.939197	-0.133038	1	GRAMD1B
ENSG00000023191	-0.0082467	0.992856	0.166064	0.85769	0.174311	1	RNH1
ENSG00000023228	0.0178877	0.972794	-0.102845	0.866008	-0.120733	1	NDUFS1
ENSG00000023287	-0.182654	0.576769	-0.24529	0.622173	-0.0626359	1	RB1CC1
ENSG00000023318	0.0116813	0.987579	0.0378944	0.970583	0.0262131	1	ERP44
ENSG00000023330	-0.0211401	0.969883	0.0428139	0.96123	0.0639541	1	ALAS1
ENSG00000023445	-4.5854	NA	-0.4215	NA	4.1639	NA	BIRC3
ENSG00000023516	-0.131598	0.86835	-0.286492	0.771229	-0.154894	1	AKAP11
ENSG00000023572	-0.165332	0.772291	-0.0129585	0.990685	0.152374	1	GLRX2
ENSG00000023608	0.122063	0.849312	0.0515058	0.96956	-0.0705568	1	SNAPC1
ENSG00000023697	-0.044989	0.954115	0.342783	0.591497	0.387772	1	DERA
ENSG00000023734	0.0384969	0.952984	0.128802	0.85941	0.090305	1	STRAP
ENSG00000023839	-1.94631	0.116146	-0.363907	NA	1.5824	1	ABCC2
ENSG00000023892	-2.8298	0.0964814	-0.220338	NA	2.60946	0.794912	DEF6
ENSG00000023902	0.168004	0.763191	0.147193	0.875214	-0.0208112	1	PLEKHO1
ENSG00000023909	-0.444867	0.48285	-0.265043	0.837801	0.179824	1	GCLM
ENSG00000024048	-0.19156	0.537479	-0.242323	0.622173	-0.0507628	1	UBR2
ENSG00000024422	-0.649482	0.408449	-0.299499	0.866008	0.349983	1	EHD2
ENSG00000024526	-0.360613	0.630844	-0.326768	0.80533	0.0338453	1	DEPDC1
ENSG00000024862	-0.129474	0.870683	-0.0334374	0.982578	0.0960363	1	CCDC28A
ENSG00000025039	0.701368	0.20692	0.237594	0.866008	-0.463775	1	RRAGD
ENSG00000025156	0.0901107	0.900826	0.0688253	0.957839	-0.0212854	1	HSF2
ENSG00000025293	-0.178331	0.698966	-0.193065	0.796702	-0.0147341	1	PHF20
ENSG00000025423	0.812025	0.44954	0.329277	NA	-0.482748	1	HSD17B6
ENSG00000025434	0.175867	0.835715	0.32693	0.771229	0.151063	1	NR1H3
ENSG00000025708	-4.58528	NA	-0.661887	NA	3.92339	NA	TYMP
ENSG00000025770	0.0579079	0.934718	0.256696	0.731576	0.198788	1	NCAPH2
ENSG00000025772	-0.215604	0.690114	-0.041968	0.973233	0.173636	1	TOMM34
ENSG00000025796	-0.0771642	0.911579	-0.237974	0.772892	-0.16081	1	SEC63
ENSG00000025800	-0.0797836	0.850502	-0.11984	0.829504	-0.0400565	1	KPNA6
ENSG00000026025	0.0648161	0.902791	0.109456	0.88157	0.0446394	1	VIM
ENSG00000026036	-1.30795	0.573666	-1.07412	NA	0.233834	1	RTEL1-TNFRSF6B
ENSG00000026103	-0.208042	0.853369	0.0665136	0.973233	0.274555	1	FAS
ENSG00000026297	-0.351056	0.779836	0.258048	0.903542	0.609104	1	RNASET2
ENSG00000026508	-0.430301	0.443581	-0.126835	0.926833	0.303466	1	CD44
ENSG00000026559	-0.215311	0.860528	-0.157291	0.935263	0.0580195	1	KCNG1
ENSG00000026652	0.188804	0.755053	-0.0485656	0.970583	-0.23737	1	AGPAT4
ENSG00000026751	-5.56116	NA	-3.92331	NA	1.63785	1	SLAMF7
ENSG00000026950	-0.309545	0.590619	-0.393028	0.679415	-0.0834824	1	BTN3A1
ENSG00000027001	0.207774	0.53187	0.189526	0.753008	-0.0182477	1	MIPEP
ENSG00000027075	-1.38332	0.499456	0.118863	NA	1.50219	1	PRKCH
ENSG00000027644	1.02082	NA	-0.682977	NA	-1.7038	1	INSRR
ENSG00000027697	0.13474	0.787248	0.0629299	0.946901	-0.0718103	1	IFNGR1
ENSG00000027847	0.11604	0.864117	0.187298	0.829504	0.0712584	1	B4GALT7
ENSG00000027869	-1.57747	0.663848	1.49878	NA	3.07626	1	SH2D2A
ENSG00000028116	-2.9809	0.0304668	-1.02798	NA	1.95292	0.995907	VRK2
ENSG00000028137	-0.666289	0.395015	-0.016162	0.994896	0.650127	1	TNFRSF1B
ENSG00000028203	-0.0295275	0.960193	-0.0688322	0.92704	-0.0393047	1	VEZT
ENSG00000028277	-0.369461	0.816975	-0.0485359	0.988915	0.320925	1	POU2F2
ENSG00000028310	-0.541798	0.359053	0.0011477	0.998908	0.542946	1	BRD9
ENSG00000028528	-0.0535406	0.907722	-0.151766	0.790359	-0.0982255	1	SNX1
ENSG00000028839	-0.112611	0.815105	0.0827841	0.917945	0.195395	1	TBPL1
ENSG00000029153	-0.710029	0.186338	-0.390263	0.749113	0.319765	1	BMAL2
ENSG00000029363	-0.000949981	0.999208	-0.238379	0.801422	-0.237429	1	BCLAF1
ENSG00000029364	0.083596	0.899575	0.0603432	0.9607	-0.0232528	1	SLC39A9
ENSG00000029534	0.532843	0.597692	0.329072	0.870241	-0.203771	1	ANK1
ENSG00000029559	-2.31678	NA	0.240615	NA	2.55739	1	IBSP
ENSG00000029639	-0.153261	0.853461	-0.114743	0.929681	0.0385188	1	TFB1M
ENSG00000029725	0.0320287	0.965422	-0.196273	0.802119	-0.228302	1	RABEP1
ENSG00000029993	-0.154217	0.710932	-0.0938435	0.903163	0.0603733	1	HMGB3
ENSG00000030066	-0.0645768	0.891501	-0.106424	0.870667	-0.041847	1	NUP160
ENSG00000030110	0.0982234	0.858464	0.130478	0.866008	0.032255	1	BAK1
ENSG00000030304	0.284777	0.84915	0.75381	NA	0.469033	1	MUSK
ENSG00000030419	-0.620457	0.554952	-0.321038	0.885345	0.29942	1	IKZF2
ENSG00000030582	0.16921	0.716007	0.147416	0.85097	-0.0217938	1	GRN
ENSG00000031003	0.177155	0.828091	-0.209927	0.86223	-0.387083	1	FAM13B
ENSG00000031081	-0.0800663	0.927337	-0.200187	0.847866	-0.120121	1	ARHGAP31
ENSG00000031691	0.138208	0.844338	-0.0671168	0.9607	-0.205324	1	CENPQ
ENSG00000031698	-0.299622	0.536986	-0.0616912	0.96429	0.237931	1	SARS1
ENSG00000031823	0.0629992	0.911329	0.0844956	0.916958	0.0214964	1	RANBP3
ENSG00000032219	0.150555	0.714484	-0.0827639	0.914711	-0.233319	1	ARID4A
ENSG00000032389	0.132488	0.791984	0.00731723	0.994896	-0.125171	1	EIPR1
ENSG00000032444	0.15825	0.789435	0.0175552	0.989315	-0.140695	1	PNPLA6
ENSG00000032742	0.0199865	0.982405	0.114754	0.912656	0.0947673	1	IFT88
ENSG00000033011	0.0465643	0.93707	0.237875	0.685809	0.19131	1	ALG1
ENSG00000033030	-0.365432	0.43767	-0.164194	0.876981	0.201238	1	ZCCHC8
ENSG00000033050	-0.0689587	0.888235	0.091598	0.895196	0.160557	1	ABCF2
ENSG00000033100	0.0146251	0.987586	-0.0154677	0.990239	-0.0300928	1	CHPF2
ENSG00000033122	0.514132	0.517623	0.209584	0.903716	-0.304548	1	LRRC7
ENSG00000033170	-0.234637	0.700881	-0.290628	0.765091	-0.0559916	1	FUT8
ENSG00000033178	-0.3432	0.394408	-0.323415	0.659198	0.019785	1	UBA6
ENSG00000033327	0.231335	0.626947	0.124209	0.895196	-0.107126	1	GAB2
ENSG00000033627	0.268254	0.454808	0.302236	0.607268	0.0339822	1	ATP6V0A1
ENSG00000033800	-0.0125751	0.990904	-0.196765	0.841975	-0.18419	1	PIAS1
ENSG00000033867	-0.723499	0.382708	-0.494156	0.768214	0.229343	1	SLC4A7
ENSG00000034053	0.169587	0.719926	0.106313	0.901947	-0.0632746	1	APBA2
ENSG00000034152	-0.249689	0.683236	-0.0302743	0.985223	0.219415	1	MAP2K3
ENSG00000034239	0.502397	0.567852	-0.0851115	0.970583	-0.587508	1	CLXN
ENSG00000034510	-0.0892022	0.904908	0.234689	0.796304	0.323891	1	TMSB10
ENSG00000034533	-0.260076	0.716007	0.00190618	0.998176	0.261982	1	ASTE1
ENSG00000034677	-0.132259	0.857472	0.0673303	0.96123	0.19959	1	RNF19A
ENSG00000034693	-0.10342	0.893038	0.132377	0.905789	0.235797	1	PEX3
ENSG00000034713	0.175925	0.730322	0.12812	0.885925	-0.0478052	1	GABARAPL2
ENSG00000034971	NA	NA	NA	NA	NA	NA	MYOC
ENSG00000035115	-0.209697	0.657054	0.0938823	0.925359	0.303579	1	SH3YL1
ENSG00000035141	0.130053	0.707552	0.0524132	0.940489	-0.0776399	1	FAM136A
ENSG00000035403	-0.168333	0.801166	-0.126025	0.907562	0.0423079	1	VCL
ENSG00000035499	0.0286424	0.973715	-0.150738	0.88288	-0.17938	1	DEPDC1B
ENSG00000035664	-1.98074	0.33207	-0.770215	NA	1.21052	1	DAPK2
ENSG00000035681	-0.169706	0.813702	-0.29562	0.758696	-0.125915	1	NSMAF
ENSG00000035687	-0.275095	0.498483	-0.121773	0.890471	0.153322	1	ADSS2
ENSG00000035720	1.1247	NA	2.87846	NA	1.75376	1	STAP1
ENSG00000035862	0.151558	0.839909	-0.0876428	0.946135	-0.239201	1	TIMP2
ENSG00000035928	-0.216037	0.656026	-0.33561	0.631179	-0.119574	1	RFC1
ENSG00000036054	-0.033312	0.964644	-0.12809	0.886651	-0.0947781	1	TBC1D23
ENSG00000036257	-0.0566851	0.920768	-0.0862892	0.911683	-0.0296041	1	CUL3
ENSG00000036448	0.292715	0.791638	0.0415854	0.987692	-0.251129	1	MYOM2
ENSG00000036473	-1.27662	NA	0.290647	NA	1.56726	1	OTC
ENSG00000036530	0.758936	0.335539	0.538045	0.739346	-0.22089	1	CYP46A1
ENSG00000036549	-0.231629	0.614106	-0.193591	0.812656	0.0380385	1	ZZZ3
ENSG00000036565	0.755276	0.663251	0.108547	NA	-0.646729	1	SLC18A1
ENSG00000036672	0.512793	0.463619	0.398468	0.771347	-0.114325	1	USP2
ENSG00000036828	1.48545	NA	0.300329	NA	-1.18512	1	CASR
ENSG00000037042	0.182933	0.872172	0.180218	0.915084	-0.00271521	1	TUBG2
ENSG00000037241	-0.0812094	0.880721	0.205263	0.75327	0.286473	1	RPL26L1
ENSG00000037280	0.775502	0.571565	0.0121316	NA	-0.76337	1	FLT4
ENSG00000037474	-0.18675	0.642832	-0.147956	0.838916	0.0387939	1	NSUN2
ENSG00000037637	-0.0571564	0.894298	-0.137418	0.797464	-0.0802613	1	FBXO42
ENSG00000037749	-0.0126532	0.991118	-0.120808	0.919979	-0.108155	1	MFAP3
ENSG00000037757	0.0878291	0.928351	0.108798	0.936364	0.020969	1	MRI1
ENSG00000037897	-0.336069	0.609361	-0.063682	0.970583	0.272387	1	METTL1
ENSG00000037965	-6.2527	NA	0	NA	5.58156	1	HOXC8
ENSG00000038002	0.0173056	0.985368	0.115729	0.915154	0.0984239	1	AGA
ENSG00000038210	-0.7616	0.330749	-0.350014	0.84061	0.411586	1	PI4K2B
ENSG00000038219	-0.311094	0.719926	-0.646016	0.523664	-0.334922	1	BOD1L1
ENSG00000038274	-0.139571	0.700526	-0.127467	0.834648	0.0121042	1	MAT2B
ENSG00000038295	0.404057	0.879126	0.504364	NA	0.100307	1	TLL1
ENSG00000038358	0.0352255	0.960847	0.0796702	0.931226	0.0444447	1	EDC4
ENSG00000038382	-0.402243	0.46846	-0.590181	0.413174	-0.187937	1	TRIO
ENSG00000038427	-0.48146	0.497659	-0.574548	0.620918	-0.0930882	1	VCAN
ENSG00000038532	-0.0644359	0.92609	-0.128548	0.885925	-0.0641119	1	CLEC16A
ENSG00000038945	-0.68828	NA	1.58668	NA	2.27496	1	MSR1
ENSG00000039068	-10.2016	NA	-1.86849	NA	8.33312	NA	CDH1
ENSG00000039123	-0.174798	0.740967	-0.137036	0.88157	0.0377624	1	MTREX
ENSG00000039139	-1.64341	0.135787	-0.669608	0.806612	0.973803	1	DNAH5
ENSG00000039319	0.047679	0.943418	-0.097802	0.907209	-0.145481	1	ZFYVE16
ENSG00000039523	-0.225502	0.742798	-0.213787	0.846975	0.0117144	1	RIPOR1
ENSG00000039537	0.501153	NA	-1.42832	NA	-1.92947	1	C6
ENSG00000039560	-0.607629	0.267192	-0.506762	0.620918	0.100867	1	RAI14
ENSG00000039600	0.353576	0.940191	-0.685159	NA	-1.03873	1	SOX30
ENSG00000039650	0.302002	0.557694	0.326492	0.718305	0.0244898	1	PNKP
ENSG00000039987	-2.30598	NA	-0.560457	NA	1.74553	1	BEST2
ENSG00000040199	-0.51924	0.308684	-0.591865	0.413174	-0.0726247	1	PHLPP2
ENSG00000040275	-0.301511	0.587437	-0.303924	0.753002	-0.002413	1	SPDL1
ENSG00000040341	-0.0523677	0.936955	-0.0870266	0.920249	-0.0346589	1	STAU2
ENSG00000040487	0.0302195	0.973715	0.0863168	0.944344	0.0560974	1	SLC66A1
ENSG00000040531	0.199304	0.673752	0.108616	0.905792	-0.0906883	1	CTNS
ENSG00000040608	0.258778	0.663794	0.320712	0.740552	0.0619346	1	RTN4R
ENSG00000040633	0.199295	0.5171	-0.00208588	0.998176	-0.201381	1	PHF23
ENSG00000040731	0.169331	0.797576	-0.25144	0.791042	-0.420771	1	CDH10
ENSG00000040933	0.021194	0.969899	-0.06649	0.92704	-0.087684	1	INPP4A
ENSG00000041353	-1.24659	0.12307	-0.561591	0.775082	0.685003	1	RAB27B
ENSG00000041357	-0.0524045	0.937625	-0.133375	0.867181	-0.0809702	1	PSMA4
ENSG00000041515	0.678392	0.394123	0.286233	0.875613	-0.392159	1	MYO16
ENSG00000041802	-0.0713515	0.895673	-0.0887525	0.90922	-0.017401	1	LSG1
ENSG00000041880	-0.447234	0.635911	0.153494	0.942512	0.600728	1	PARP3
ENSG00000041982	0.633727	0.361939	0.262451	0.872185	-0.371276	1	TNC
ENSG00000041988	0.204198	0.678867	0.313802	0.681054	0.109604	1	THAP3
ENSG00000042062	-0.632456	0.886981	0.41574	NA	1.0482	1	RIPOR3
ENSG00000042088	-0.135179	0.854015	-0.0335514	0.981603	0.101627	1	TDP1
ENSG00000042286	-0.252516	0.710932	-0.114644	0.932933	0.137872	1	AIFM2
ENSG00000042304	NA	NA	NA	NA	NA	NA	C2orf83
ENSG00000042317	0.402203	0.429071	0.268946	0.793719	-0.133257	1	SPATA7
ENSG00000042429	-0.0956451	0.783512	-0.102825	0.845702	-0.00717962	1	MED17
ENSG00000042445	0.144184	0.812023	0.208561	0.806234	0.0643774	1	RETSAT
ENSG00000042493	-1.91056	0.284339	-0.681214	0.877331	1.22935	1	CAPG
ENSG00000042753	-0.0033998	0.997733	0.134274	0.887493	0.137674	1	AP2S1
ENSG00000042781	-1.88908	0.409894	-1.23675	NA	0.652332	1	USH2A
ENSG00000042813	2.34481	NA	2.13434	NA	0	1	ZPBP
ENSG00000042832	0.577772	0.811298	0.104241	NA	-0.473531	1	TG
ENSG00000042980	-0.527373	0.826216	-0.341255	NA	0.186118	1	ADAM28
ENSG00000043039	1.33057	0.45903	0.658109	NA	-0.672464	1	BARX2
ENSG00000043093	0.027132	0.974656	-0.0313242	0.981603	-0.0584562	1	DCUN1D1
ENSG00000043143	-1.13309	0.0847291	-0.677477	0.629928	0.455614	1	JADE2
ENSG00000043355	0.547966	0.180391	0.328677	0.718305	-0.219289	1	ZIC2
ENSG00000043462	-3.20684	NA	-0.671144	NA	2.5357	1	LCP2
ENSG00000043514	-0.0320239	0.971975	0.00750618	0.995263	0.0395301	1	TRIT1
ENSG00000043591	0.773989	0.49533	0.687492	NA	-0.0864971	1	ADRB1
ENSG00000044012	NA	NA	NA	NA	NA	NA	GUCA2B
ENSG00000044090	0.038772	0.940528	0.019788	0.982392	-0.0189839	1	CUL7
ENSG00000044115	0.0138532	0.978924	0.0391356	0.959336	0.0252824	1	CTNNA1
ENSG00000044446	-0.176621	0.731584	-0.0470163	0.970399	0.129605	1	PHKA2
ENSG00000044459	0.204038	0.787242	-0.133245	0.918675	-0.337283	1	CNTLN
ENSG00000044524	0.27539	0.696921	-0.0187484	0.990239	-0.294139	1	EPHA3
ENSG00000044574	-0.279971	0.498782	-0.133401	0.882642	0.14657	1	HSPA5
ENSG00000046604	-0.86795	0.0499925	-0.409523	0.693202	0.458427	1	DSG2
ENSG00000046647	-0.0657411	0.938084	0.269531	0.768214	0.335273	1	GEMIN8
ENSG00000046651	-0.302984	0.572086	0.0621061	0.968364	0.36509	1	OFD1
ENSG00000046653	0.737502	0.232493	0.358824	0.796304	-0.378678	1	GPM6B
ENSG00000046774	-4.1031	NA	0	NA	3.43196	1	MAGEC2
ENSG00000046889	0.145137	0.89633	-0.0103985	0.995561	-0.155535	1	PREX2
ENSG00000047056	-0.204487	0.72677	-0.198321	0.834439	0.0061661	1	WDR37
ENSG00000047188	-0.0958207	0.858671	-0.25162	0.686019	-0.1558	1	YTHDC2
ENSG00000047230	-0.164711	0.757179	-0.0417385	0.970583	0.122973	1	CTPS2
ENSG00000047249	0.0772737	0.873592	0.0912475	0.895196	0.0139738	1	ATP6V1H
ENSG00000047315	-0.211746	0.682685	-0.155893	0.87059	0.0558532	1	POLR2B
ENSG00000047346	-0.046058	0.954159	-0.256121	0.744699	-0.210063	1	ATOSA
ENSG00000047365	-2.58441	0.17006	-0.290878	0.966071	2.29354	1	ARAP2
ENSG00000047410	-0.175022	0.853369	-0.511171	0.609601	-0.336149	1	TPR
ENSG00000047457	-2.71558	0.26355	0.477204	0.947303	3.19279	0.815241	CP
ENSG00000047578	0.0500445	0.947905	-0.0344313	0.976405	-0.0844758	1	KATNIP
ENSG00000047579	0.449904	0.271717	-0.0164879	0.989698	-0.466392	1	DTNBP1
ENSG00000047597	0.377971	0.831391	-0.325362	NA	-0.703333	1	XK
ENSG00000047617	0.111576	0.90396	-0.149784	0.907881	-0.26136	1	ANO2
ENSG00000047621	-0.323006	0.664297	-0.143172	0.926833	0.179834	1	C12orf4
ENSG00000047634	-1.17101	0.123274	-0.457991	0.809946	0.713014	1	SCML1
ENSG00000047644	-0.232222	0.629997	-0.189317	0.82668	0.0429046	1	WWC3
ENSG00000047648	0.0498307	0.977601	-0.0625082	0.982392	-0.112339	1	ARHGAP6
ENSG00000047662	-0.14334	0.936478	-0.216951	0.927738	-0.073611	1	FAM184B
ENSG00000047849	-0.131524	0.868236	-0.185759	0.866008	-0.0542344	1	MAP4
ENSG00000047932	-0.192757	0.678867	-0.279163	0.693113	-0.0864057	1	GOPC
ENSG00000047936	-6.95324	NA	-0.542617	NA	6.41063	NA	ROS1
ENSG00000048028	-0.18527	0.700881	-0.103917	0.909135	0.0813532	1	USP28
ENSG00000048052	-0.0607361	0.954127	0.188998	0.876534	0.249734	1	HDAC9
ENSG00000048140	0.137695	0.804191	0.12647	0.885925	-0.0112249	1	TSPAN17
ENSG00000048162	-0.245987	0.629997	-0.0499212	0.970583	0.196066	1	NOP16
ENSG00000048342	0.0849951	0.883893	-0.0432545	0.970344	-0.12825	1	CC2D2A
ENSG00000048392	-0.196119	0.593966	-0.178928	0.790359	0.017191	1	RRM2B
ENSG00000048405	-0.133895	0.767504	-0.0478656	0.961781	0.0860292	1	ZNF800
ENSG00000048462	-1.42239	NA	0	NA	0.751254	1	TNFRSF17
ENSG00000048471	0.0529884	0.949509	-0.174789	0.848341	-0.227777	1	SNX29
ENSG00000048540	0.492516	0.79238	0.463829	0.876981	-0.0286868	1	LMO3
ENSG00000048544	-0.229399	0.682685	-0.0643724	0.96353	0.165026	1	MRPS10
ENSG00000048545	-0.255185	0.907531	-0.178347	NA	0.0768388	1	GUCA1A
ENSG00000048649	0.0586761	0.938556	-0.271091	0.731576	-0.329767	1	RSF1
ENSG00000048707	-0.113467	0.868	-0.282345	0.731576	-0.168878	1	VPS13D
ENSG00000048740	0.299545	0.513386	0.193384	0.828042	-0.106161	1	CELF2
ENSG00000048828	-0.270647	0.465744	-0.0529607	0.960717	0.217686	1	FAM120A
ENSG00000048991	-0.121595	0.862943	-0.0711026	0.954821	0.0504929	1	R3HDM1
ENSG00000049089	0.543713	0.505213	0.367882	0.815015	-0.175831	1	COL9A2
ENSG00000049130	-0.331821	0.433115	-0.249107	0.764695	0.0827139	1	KITLG
ENSG00000049167	-0.0273844	0.979483	0.0753573	0.961781	0.102742	1	ERCC8
ENSG00000049192	-0.802882	0.214945	-0.791723	0.413174	0.0111591	1	ADAMTS6
ENSG00000049239	-0.0821259	0.917	-0.221599	0.812656	-0.139473	1	H6PD
ENSG00000049245	0.0644226	0.92401	0.146392	0.866008	0.0819698	1	VAMP3
ENSG00000049246	0.0452506	0.966926	-0.100129	0.947915	-0.14538	1	PER3
ENSG00000049247	-4.36914	NA	0	NA	3.698	1	UTS2
ENSG00000049249	-2.16353	0.627206	1.30576	NA	3.46929	1	TNFRSF9
ENSG00000049283	-6.92757	NA	-2.91592	NA	4.01165	NA	EPN3
ENSG00000049323	-0.459187	0.524804	-0.406788	0.758696	0.0523985	1	LTBP1
ENSG00000049449	0.0147097	0.985084	-0.233075	0.753008	-0.247785	1	RCN1
ENSG00000049540	0.844805	0.583405	0.73218	0.793719	-0.112625	1	ELN
ENSG00000049541	0.0343558	0.959436	0.0662111	0.940452	0.0318553	1	RFC2
ENSG00000049618	-0.152545	0.802113	-0.375665	0.584656	-0.22312	1	ARID1B
ENSG00000049656	-0.271807	0.710903	0.0591727	0.971337	0.33098	1	CLPTM1L
ENSG00000049759	0.120621	0.895712	-0.00454297	0.997832	-0.125164	1	NEDD4L
ENSG00000049768	-0.0303992	0.992794	0.819377	NA	0.849776	1	FOXP3
ENSG00000049769	0.71306	0.233147	0.256053	0.864565	-0.457006	1	PPP1R3F
ENSG00000049860	0.071306	0.858671	-0.00713719	0.990685	-0.0784432	1	HEXB
ENSG00000049883	-0.187886	0.736229	0.170399	0.857506	0.358285	1	PTCD2
ENSG00000050030	0.577692	0.552227	-0.0579159	0.982578	-0.635608	1	NEXMIF
ENSG00000050130	-0.00484221	0.994845	0.0115024	0.990318	0.0163446	1	JKAMP
ENSG00000050165	0.209881	0.647118	-0.0784763	0.935263	-0.288357	1	DKK3
ENSG00000050327	-4.18325	NA	-1.39142	NA	2.79183	NA	ARHGEF5
ENSG00000050344	-0.590027	0.687535	-0.442645	0.86758	0.147383	1	NFE2L3
ENSG00000050393	0.2229	0.45903	0.192398	0.736263	-0.0305023	1	MCUR1
ENSG00000050405	-0.0681102	0.908947	-0.0374703	0.970583	0.0306399	1	LIMA1
ENSG00000050426	0.202217	0.743344	0.176821	0.866008	-0.0253959	1	LETMD1
ENSG00000050438	0.429434	0.449798	-0.0751344	0.964615	-0.504568	1	SLC4A8
ENSG00000050555	0.367576	0.851188	0.631119	NA	0.263543	1	LAMC3
ENSG00000050628	-0.00991377	0.998155	0.274428	NA	0.284342	1	PTGER3
ENSG00000050730	-0.0424515	0.995567	-0.473129	NA	-0.430678	1	TNIP3
ENSG00000050748	-0.16269	0.786876	-0.101786	0.922565	0.0609046	1	MAPK9
ENSG00000050767	0.563257	0.339929	0.142664	0.926833	-0.420594	1	COL23A1
ENSG00000050820	-0.129554	0.885525	0.0543223	0.973233	0.183877	1	BCAR1
ENSG00000051009	-0.176135	0.852524	-0.0649229	0.970583	0.111212	1	FHIP1B
ENSG00000051108	-0.385712	0.352476	-0.0327243	0.980365	0.352988	1	HERPUD1
ENSG00000051128	0.446936	0.448573	0.285851	0.808978	-0.161085	1	HOMER3
ENSG00000051180	-0.0562223	0.933693	0.117015	0.889672	0.173237	1	RAD51
ENSG00000051341	-0.190097	0.836582	-0.553777	0.54798	-0.36368	1	POLQ
ENSG00000051382	-0.23605	0.45903	-0.315903	0.485345	-0.0798532	1	PIK3CB
ENSG00000051523	-1.50541	0.528502	0.417204	0.942512	1.92261	1	CYBA
ENSG00000051596	-0.0221141	0.975025	0.0145594	0.989315	0.0366735	1	THOC3
ENSG00000051620	0.265363	0.628827	0.383978	0.647054	0.118614	1	HEBP2
ENSG00000051825	-0.255351	0.707552	-0.378041	0.714336	-0.12269	1	MPHOSPH9
ENSG00000052126	-0.261662	0.608915	-0.451938	0.48975	-0.190276	1	PLEKHA5
ENSG00000052344	-4.94261	NA	-0.120085	NA	4.82253	NA	PRSS8
ENSG00000052723	-0.0330897	0.960847	-0.0785916	0.92704	-0.0455019	1	SIKE1
ENSG00000052749	-0.337838	0.522215	0.002422	0.998176	0.34026	1	RRP12
ENSG00000052795	-0.433292	0.300805	-0.349952	0.666403	0.0833405	1	FNIP2
ENSG00000052802	-0.199339	0.788998	-0.0945597	0.946858	0.104779	1	MSMO1
ENSG00000052841	0.0194547	0.979081	-0.162858	0.828042	-0.182312	1	TTC17
ENSG00000052850	0.395458	0.931725	0.316737	NA	-0.0787217	1	ALX4
ENSG00000053108	-1.01463	0.483552	0.00256365	NA	1.01719	1	FSTL4
ENSG00000053254	-0.193321	0.792779	-0.273303	0.793719	-0.0799826	1	FOXN3
ENSG00000053328	0.501137	NA	0.290647	NA	0	1	METTL24
ENSG00000053371	0.335758	0.211514	0.550517	0.0105939	0.214758	1	AKR7A2
ENSG00000053372	-0.122994	0.788686	0.042944	0.966069	0.165938	1	MRTO4
ENSG00000053438	0.606564	0.294597	0.570144	0.552874	-0.0364203	1	NNAT
ENSG00000053501	0.39928	0.448779	0.0562846	0.970583	-0.342996	1	USE1
ENSG00000053524	-0.476181	0.736832	-0.433534	NA	0.0426471	1	MCF2L2
ENSG00000053702	0.474469	0.725514	0.57742	NA	0.102952	1	NRIP2
ENSG00000053747	-3.78467	NA	1.08241	NA	4.86708	NA	LAMA3
ENSG00000053770	0.155399	0.749327	0.0631338	0.948714	-0.0922651	1	AP5M1
ENSG00000053900	-0.169297	0.65612	0.0122895	0.989373	0.181587	1	ANAPC4
ENSG00000053918	1.34069	0.621963	0.27131	NA	-1.06938	1	KCNQ1
ENSG00000054116	0.162189	0.73565	0.0993993	0.907562	-0.0627897	1	TRAPPC3
ENSG00000054118	0.0103489	0.992331	-0.263245	0.777671	-0.273594	1	THRAP3
ENSG00000054148	0.334908	0.623074	0.365529	0.749994	0.0306211	1	PHPT1
ENSG00000054179	1.79753	0.368365	1.87362	NA	0.0760947	1	ENTPD2
ENSG00000054219	-2.00133	NA	-1.01053	NA	0.990803	1	LY75
ENSG00000054267	-0.124809	0.742532	-0.344515	0.317316	-0.219705	1	ARID4B
ENSG00000054277	0.202571	0.768068	0.0674578	0.964761	-0.135113	1	OPN3
ENSG00000054282	-0.505385	0.433077	-0.316398	0.806943	0.188987	1	SDCCAG8
ENSG00000054356	-0.180685	0.869354	-0.209279	0.892565	-0.0285936	1	PTPRN
ENSG00000054392	0.365931	0.380809	0.222857	0.795636	-0.143073	1	HHAT
ENSG00000054523	0.164071	0.763571	-0.172423	0.8403	-0.336494	1	KIF1B
ENSG00000054598	-0.737872	0.639477	0.0322403	NA	0.770112	1	FOXC1
ENSG00000054611	-0.0920147	0.849928	0.0138896	0.988865	0.105904	1	TBC1D22A
ENSG00000054654	-0.189357	0.812535	-0.52953	0.516576	-0.340173	1	SYNE2
ENSG00000054690	0.358566	0.619642	0.257561	0.846975	-0.101005	1	PLEKHH1
ENSG00000054793	0.0259372	0.975076	-0.209013	0.806943	-0.23495	1	ATP9A
ENSG00000054796	NA	NA	NA	NA	NA	NA	SPO11
ENSG00000054803	0.579603	0.326369	0.0468694	0.979488	-0.532733	1	CBLN4
ENSG00000054938	0.235872	0.944481	0.579013	NA	0.343141	1	CHRDL2
ENSG00000054965	0.0553526	0.920081	-0.132337	0.84418	-0.18769	1	FAM168A
ENSG00000054967	-0.0524248	0.962766	0.114845	0.939932	0.16727	1	RELT
ENSG00000054983	0.31629	0.628307	0.0550779	0.973233	-0.261212	1	GALC
ENSG00000055044	-0.407606	0.330749	-0.192725	0.834439	0.214881	1	NOP58
ENSG00000055070	0.00316327	0.996668	-0.0151376	0.988189	-0.0183009	1	SZRD1
ENSG00000055118	0.333488	0.817245	0.21521	0.928884	-0.118278	1	KCNH2
ENSG00000055130	-0.0227401	0.971565	-0.174482	0.793719	-0.151742	1	CUL1
ENSG00000055147	0.00383016	0.996751	-0.113983	0.893651	-0.117814	1	FAM114A2
ENSG00000055163	0.21319	0.561721	0.0547499	0.953411	-0.15844	1	CYFIP2
ENSG00000055208	0.00769112	0.993795	-0.145106	0.88157	-0.152797	1	TAB2
ENSG00000055211	0.0950579	0.88511	-0.0406109	0.972933	-0.135669	1	GINM1
ENSG00000055332	-0.117899	0.874263	-0.330536	0.703136	-0.212638	1	EIF2AK2
ENSG00000055483	-0.807745	0.140464	-0.188805	0.901947	0.618939	1	USP36
ENSG00000055609	-0.339094	0.539105	-0.556642	0.413174	-0.217548	1	KMT2C
ENSG00000055732	-4.53342	NA	0.109744	NA	4.64316	NA	MCOLN3
ENSG00000055813	0.223685	0.949095	-0.332052	NA	-0.555737	1	CCDC85A
ENSG00000055917	-0.0496609	0.938556	-0.0809893	0.925359	-0.0313284	1	PUM2
ENSG00000055950	0.164091	0.798458	0.178107	0.85769	0.0140161	1	MRPL43
ENSG00000055955	-2.51685	0.446154	-1.85561	NA	0.661238	1	ITIH4
ENSG00000055957	2.40636	NA	0.464202	NA	-1.94216	1	ITIH1
ENSG00000056050	-0.0228272	0.970055	0.169151	0.794446	0.191978	1	HPF1
ENSG00000056097	0.0189346	0.979081	-0.164461	0.822323	-0.183396	1	ZFR
ENSG00000056277	-0.514744	0.312783	-0.418991	0.679643	0.0957526	1	ZNF280C
ENSG00000056291	0.759152	NA	-0.497096	NA	-1.25625	1	NPFFR2
ENSG00000056487	0.687715	0.486812	0.27179	0.901947	-0.415925	1	PHF21B
ENSG00000056558	-1.29713	0.224159	-0.548512	0.828042	0.748621	1	TRAF1
ENSG00000056586	-0.208401	0.680644	-0.407392	0.516576	-0.198991	1	RC3H2
ENSG00000056736	-0.363002	0.742596	0.0406192	0.988642	0.403622	1	IL17RB
ENSG00000056972	-0.301057	0.69288	-0.0653547	0.970583	0.235703	1	TRAF3IP2
ENSG00000056998	0.175474	0.702457	-0.00655572	0.994896	-0.18203	1	GYG2
ENSG00000057019	-0.492153	0.54373	-0.464134	0.749994	0.028019	1	DCBLD2
ENSG00000057149	-2.77441	0.551584	1.8683	NA	4.64272	1	SERPINB3
ENSG00000057252	-0.593536	0.314648	-0.314957	0.806139	0.278578	1	SOAT1
ENSG00000057294	-0.692338	0.485319	-0.117906	0.970261	0.574432	1	PKP2
ENSG00000057468	-0.338633	NA	0.419431	NA	0.758064	1	MSH4
ENSG00000057593	-0.109461	0.986273	0.835115	NA	0.944576	1	F7
ENSG00000057608	-0.0788889	0.915757	0.0502226	0.970583	0.129112	1	GDI2
ENSG00000057657	-1.04835	0.179699	-0.592168	0.740552	0.456179	1	PRDM1
ENSG00000057663	-0.0694587	0.914827	0.0736263	0.939932	0.143085	1	ATG5
ENSG00000057704	0.4381	0.396391	0.306962	0.768048	-0.131137	1	TMCC3
ENSG00000057757	0.375992	0.148155	0.169484	0.788364	-0.206508	1	PITHD1
ENSG00000057935	-0.0234944	0.960282	0.0420036	0.948309	0.065498	1	MTA3
ENSG00000058056	-0.291869	0.621828	-0.18488	0.874538	0.106989	1	USP13
ENSG00000058063	-0.275912	0.5171	-0.312348	0.669927	-0.0364354	1	ATP11B
ENSG00000058085	-1.94639	0.207958	-0.601073	0.88157	1.34532	1	LAMC2
ENSG00000058091	0.118676	0.831391	-0.0458813	0.96956	-0.164558	1	CDK14
ENSG00000058262	0.00135129	0.998155	0.0395348	0.96956	0.0381835	1	SEC61A1
ENSG00000058272	-0.280519	0.565874	-0.39987	0.563279	-0.119351	1	PPP1R12A
ENSG00000058335	-0.161919	0.979994	-1.51794	NA	-1.35602	1	RASGRF1
ENSG00000058404	0.817805	0.438631	0.813148	0.674528	-0.00465637	1	CAMK2B
ENSG00000058453	-0.0542409	0.956268	-0.0972679	0.93795	-0.043027	1	CROCC
ENSG00000058600	-0.0908888	0.889028	0.0140716	0.990239	0.10496	1	POLR3E
ENSG00000058668	-0.273143	0.662284	-0.251695	0.812656	0.021448	1	ATP2B4
ENSG00000058673	-0.212162	0.636506	-0.228907	0.764401	-0.016745	1	ZC3H11A
ENSG00000058729	-0.160407	0.723399	-0.147638	0.842666	0.0127687	1	RIOK2
ENSG00000058799	0.187328	0.619642	0.23474	0.705204	0.0474126	1	YIPF1
ENSG00000058804	-0.205858	0.774221	-0.140084	0.908403	0.0657743	1	NDC1
ENSG00000058866	0.300725	0.609828	-0.00991386	0.994896	-0.310639	1	DGKG
ENSG00000059122	0.0879288	0.894298	-0.0898509	0.928454	-0.17778	1	FLYWCH1
ENSG00000059145	0.223831	0.664563	0.122023	0.903663	-0.101807	1	UNKL
ENSG00000059377	-0.764996	0.61551	-0.399749	NA	0.365248	1	TBXAS1
ENSG00000059378	-1.09831	0.113645	-0.0986723	0.970399	0.999633	0.822631	PARP12
ENSG00000059573	-0.0148757	0.982405	0.0453734	0.963941	0.0602491	1	ALDH18A1
ENSG00000059588	-0.563357	0.284339	-0.247702	0.838916	0.315655	1	TARBP1
ENSG00000059691	-0.136656	0.783916	0.117007	0.885925	0.253663	1	GATB
ENSG00000059728	-1.41569	0.308233	-0.216223	0.960719	1.19947	1	MXD1
ENSG00000059758	-0.0512454	0.950456	-0.0676498	0.955372	-0.0164045	1	CDK17
ENSG00000059769	-0.125248	0.847013	-0.227857	0.791368	-0.102609	1	DNAJC25
ENSG00000059804	-0.374105	0.399448	-0.179403	0.852665	0.194702	1	SLC2A3
ENSG00000059915	0.527266	0.636672	0.295837	0.892565	-0.231429	1	PSD
ENSG00000060069	0.0248473	0.973715	-0.00715492	0.994896	-0.0320023	1	CTDP1
ENSG00000060138	0.0816463	0.9139	0.478658	0.4192	0.397011	1	YBX3
ENSG00000060140	-3.34629	0.150599	-1.30623	NA	2.04006	1	STYK1
ENSG00000060237	-0.108531	0.858464	-0.278922	0.693113	-0.170391	1	WNK1
ENSG00000060303	0.501171	NA	0.290647	NA	0	1	RPS17P5
ENSG00000060339	-0.165147	0.710028	-0.255783	0.693202	-0.0906362	1	CCAR1
ENSG00000060491	-0.0513407	0.947905	-0.132182	0.887493	-0.0808411	1	OGFR
ENSG00000060558	-5.99646	NA	0.492413	NA	6.48888	NA	GNA15
ENSG00000060566	NA	NA	NA	NA	NA	NA	CREB3L3
ENSG00000060642	0.0398162	0.959436	-0.0360961	0.975042	-0.0759122	1	PIGV
ENSG00000060656	-0.0821932	0.931513	-0.225161	0.838916	-0.142968	1	PTPRU
ENSG00000060688	-0.0921164	0.870302	0.119373	0.88157	0.21149	1	SNRNP40
ENSG00000060709	0.586737	0.336749	0.0162218	0.991526	-0.570516	1	RIMBP2
ENSG00000060718	0.15983	0.837128	-0.239826	0.818231	-0.399656	1	COL11A1
ENSG00000060749	-0.285998	0.62833	-0.354261	0.718305	-0.068263	1	QSER1
ENSG00000060762	0.320333	0.547806	0.178637	0.873073	-0.141696	1	MPC1
ENSG00000060971	0.259549	0.550246	0.302007	0.685063	0.0424577	1	ACAA1
ENSG00000060982	-0.497749	0.522215	-0.339142	0.822607	0.158608	1	BCAT1
ENSG00000061273	-0.0454539	0.956127	-0.0209066	0.988449	0.0245472	1	HDAC7
ENSG00000061337	-0.187227	0.86444	-0.290096	0.84061	-0.102869	1	LZTS1
ENSG00000061455	0.0587628	0.986092	0.513184	NA	0.454421	1	PRDM6
ENSG00000061492	-0.0587872	NA	2.14533	NA	2.20412	1	WNT8A
ENSG00000061656	-3.5525	0.0533259	-0.0676742	NA	3.48483	0.467465	SPAG4
ENSG00000061676	0.00552093	0.994845	-0.0194257	0.988642	-0.0249466	1	NCKAP1
ENSG00000061794	-0.204289	0.626625	-0.0266754	0.981159	0.177614	1	MRPS35
ENSG00000061918	-0.0366967	0.972852	0.264993	0.822323	0.30169	1	GUCY1B1
ENSG00000061936	-0.116058	0.869651	0.00841867	0.994896	0.124477	1	SFSWAP
ENSG00000061938	0.108864	0.880212	-0.0168978	0.989698	-0.125762	1	TNK2
ENSG00000061987	-0.187449	0.644008	-0.15377	0.829504	0.0336788	1	MON2
ENSG00000062038	-3.93923	NA	0.170872	NA	4.1101	NA	CDH3
ENSG00000062096	0.501164	NA	-2.34806	NA	-2.84923	1	ARSF
ENSG00000062194	0.026505	0.965363	-0.0549377	0.948448	-0.0814428	1	GPBP1
ENSG00000062282	-2.21088	0.241225	-0.420883	NA	1.79	1	DGAT2
ENSG00000062370	-0.352486	0.402536	-0.299631	0.714336	0.0528555	1	ZNF112
ENSG00000062485	-0.0511951	0.939738	0.0725988	0.935263	0.123794	1	CS
ENSG00000062524	-7.08742	NA	-1.09211	NA	5.9953	NA	LTK
ENSG00000062582	0.00254702	0.999427	-0.974418	NA	-0.976965	1	MRPS24
ENSG00000062598	-0.0224798	0.976024	-0.00308401	0.997832	0.0193958	1	ELMO2
ENSG00000062650	-0.167865	0.710903	-0.296327	0.629928	-0.128462	1	WAPL
ENSG00000062716	-0.349674	0.510762	0.0346985	0.982392	0.384372	1	VMP1
ENSG00000062725	0.100785	0.874234	-0.00894341	0.994187	-0.109728	1	APPBP2
ENSG00000062822	0.0667418	0.935226	0.0511584	0.970583	-0.0155834	1	POLD1
ENSG00000063015	0.705542	0.185391	0.342531	0.785387	-0.363011	1	SEZ6
ENSG00000063046	-0.120578	0.699046	-0.186011	0.688461	-0.0654324	1	EIF4B
ENSG00000063127	0.117919	0.891146	0.194543	0.872792	0.0766245	1	SLC6A16
ENSG00000063169	0.345197	0.542727	0.166524	0.889672	-0.178673	1	BICRA
ENSG00000063176	0.200154	0.731786	0.0282331	0.984072	-0.171921	1	SPHK2
ENSG00000063177	0.0837807	0.899669	0.274954	0.724638	0.191173	1	RPL18
ENSG00000063180	0.420081	0.657054	0.177077	0.927556	-0.243004	1	CA11
ENSG00000063241	-0.0517515	0.940423	0.118189	0.890121	0.169941	1	ISOC2
ENSG00000063244	-0.0539981	0.939025	0.0396077	0.970583	0.0936058	1	U2AF2
ENSG00000063245	0.24736	0.558844	0.249602	0.740552	0.00224215	1	EPN1
ENSG00000063322	0.0640593	0.897762	0.200164	0.736263	0.136105	1	MED29
ENSG00000063438	0.0891637	0.911329	-0.123288	0.912656	-0.212451	1	AHRR
ENSG00000063515	1.931	NA	0.75874	NA	-1.17226	1	GSC2
ENSG00000063587	0.0803951	0.875202	0.0768784	0.921155	-0.00351665	1	ZNF275
ENSG00000063601	-0.126459	0.79117	-0.0773976	0.926853	0.0490616	1	MTMR1
ENSG00000063660	-0.0361631	0.964515	-0.00370415	0.997832	0.0324589	1	GPC1
ENSG00000063761	0.0325408	0.979081	0.282401	0.82387	0.24986	1	ADCK1
ENSG00000063854	0.502475	0.338147	0.322595	0.768262	-0.179881	1	HAGH
ENSG00000063978	-0.0889275	0.869938	-0.0827477	0.919888	0.00617978	1	RNF4
ENSG00000064012	-0.478148	0.444164	-0.343167	0.781887	0.134981	1	CASP8
ENSG00000064042	-0.336368	0.794641	-0.105737	0.970583	0.230631	1	LIMCH1
ENSG00000064102	-0.172726	0.777409	-0.0799798	0.945982	0.0927463	1	INTS13
ENSG00000064115	-0.33236	0.494958	-0.107113	0.926833	0.225246	1	TM7SF3
ENSG00000064195	-3.90852	NA	0.290649	NA	4.19917	1	DLX3
ENSG00000064199	0.176009	0.827234	0.17683	0.885925	0.000821548	1	SPA17
ENSG00000064201	0.758497	0.628394	0.0636324	NA	-0.694865	1	TSPAN32
ENSG00000064205	-4.35103	NA	0	NA	3.67989	1	CCN5
ENSG00000064218	NA	NA	NA	NA	NA	NA	DMRT3
ENSG00000064225	-0.623125	0.600208	-0.310849	0.899398	0.312276	1	ST3GAL6
ENSG00000064270	-2.53078	0.388086	-0.298159	NA	2.23262	1	ATP2C2
ENSG00000064300	0.294787	0.917832	-0.789336	NA	-1.08412	1	NGFR
ENSG00000064309	-0.0262619	0.976507	-0.353243	0.657638	-0.326981	1	CDON
ENSG00000064313	-0.178472	0.743344	-0.168081	0.847866	0.0103913	1	TAF2
ENSG00000064393	-0.0515075	0.955958	-0.386995	0.629928	-0.335488	1	HIPK2
ENSG00000064419	-0.0294129	0.964947	0.0136345	0.989315	0.0430473	1	TNPO3
ENSG00000064489	-0.0176784	0.994688	-0.381122	NA	-0.363444	1	NA
ENSG00000064490	-0.0639424	0.94905	0.128853	0.918675	0.192795	1	RFXANK
ENSG00000064545	0.22442	0.622276	0.228098	0.774315	0.00367753	1	TMEM161A
ENSG00000064547	0.303128	0.479196	0.222346	0.793719	-0.0807822	1	LPAR2
ENSG00000064601	-0.26367	0.733654	0.0806168	0.964615	0.344286	1	CTSA
ENSG00000064607	-0.0295133	0.953754	-0.140026	0.790028	-0.110512	1	SUGP2
ENSG00000064651	-0.00478336	0.996467	-0.297734	0.714336	-0.29295	1	SLC12A2
ENSG00000064652	0.230164	0.582292	0.271112	0.698304	0.040948	1	SNX24
ENSG00000064655	0.132222	0.898714	0.288032	0.829508	0.155809	1	EYA2
ENSG00000064666	-0.245789	0.694421	0.0335308	0.982578	0.27932	1	CNN2
ENSG00000064687	-0.556815	0.599044	0.432871	0.8242	0.989686	1	ABCA7
ENSG00000064692	1.05887	0.410665	0.704724	0.791368	-0.354143	1	SNCAIP
ENSG00000064703	-0.0200152	0.97653	-0.0925229	0.908403	-0.0725077	1	DDX20
ENSG00000064726	-0.0321589	0.972455	-0.0596392	0.96956	-0.0274803	1	BTBD1
ENSG00000064763	-0.447119	0.582292	-0.246591	0.881873	0.200528	1	FAR2
ENSG00000064787	0.0867674	NA	0.54218	NA	0.455412	1	BCAS1
ENSG00000064835	-1.51823	NA	-1.41196	NA	0.106269	1	POU1F1
ENSG00000064886	-0.122423	0.973715	-0.120478	NA	0.00194446	1	CHI3L2
ENSG00000064932	-0.263725	0.77849	-0.0230782	0.990239	0.240647	1	SBNO2
ENSG00000064933	-0.157103	0.76835	-0.0462116	0.970399	0.110891	1	PMS1
ENSG00000064961	0.223813	0.472211	0.248369	0.631913	0.0245565	1	HMG20B
ENSG00000064989	-0.0684401	0.961582	-0.200795	0.907881	-0.132355	1	CALCRL
ENSG00000064995	-0.0277146	0.964644	-0.00849303	0.991533	0.0192216	1	TAF11
ENSG00000064999	-0.019235	0.974326	-0.144625	0.813188	-0.12539	1	ANKS1A
ENSG00000065000	0.0592793	0.917191	-0.0427281	0.967669	-0.102007	1	AP3D1
ENSG00000065029	-0.0649912	0.925861	-0.0911667	0.926833	-0.0261754	1	ZNF76
ENSG00000065054	-1.01226	0.436161	0.0944495	0.981049	1.1067	1	SLC9A3R2
ENSG00000065057	-0.0104646	0.994008	0.319812	0.806234	0.330277	1	NTHL1
ENSG00000065060	-0.234077	0.663848	-0.223449	0.806943	0.0106279	1	BLTP3A
ENSG00000065135	0.0623594	0.920768	0.0176922	0.988642	-0.0446672	1	GNAI3
ENSG00000065150	0.00880141	0.992331	0.0206989	0.988034	0.0118975	1	IPO5
ENSG00000065154	-0.262603	0.508639	-0.0866382	0.926833	0.175965	1	OAT
ENSG00000065183	-0.18255	0.669437	-0.147561	0.844944	0.0349891	1	WDR3
ENSG00000065243	-0.058052	0.943707	-0.115315	0.911309	-0.0572629	1	PKN2
ENSG00000065268	0.186498	0.769503	0.310566	0.731576	0.124068	1	WDR18
ENSG00000065308	-0.370955	0.521048	-0.281991	0.797464	0.088964	1	TRAM2
ENSG00000065320	0.63505	0.444209	0.164726	0.935263	-0.470324	1	NTN1
ENSG00000065325	-0.710023	NA	0.123668	NA	0.833691	1	GLP2R
ENSG00000065328	-0.121852	0.883659	-0.193488	0.866008	-0.0716362	1	MCM10
ENSG00000065357	-0.340307	0.482078	0.0345211	0.981159	0.374828	1	DGKA
ENSG00000065361	-2.54788	NA	-0.109976	NA	2.4379	NA	ERBB3
ENSG00000065371	1.34801	NA	1.13753	NA	0	1	ROPN1
ENSG00000065413	-0.80044	0.184757	-0.176338	0.919383	0.624102	1	ANKRD44
ENSG00000065427	-0.0409998	0.954159	0.117889	0.885925	0.158889	1	KARS1
ENSG00000065457	-0.291204	0.521048	-0.207199	0.812656	0.0840048	1	ADAT1
ENSG00000065485	0.415611	0.412204	0.269404	0.793719	-0.146207	1	PDIA5
ENSG00000065491	-0.0228537	0.975514	-0.0140576	0.989698	0.00879614	1	TBC1D22B
ENSG00000065518	0.0222526	0.972794	0.36338	0.413174	0.341127	1	NDUFB4
ENSG00000065526	0.0208558	0.98651	-0.419461	0.707326	-0.440317	1	SPEN
ENSG00000065534	-0.241945	0.660581	-0.389765	0.620918	-0.14782	1	MYLK
ENSG00000065548	-0.163592	0.698791	-0.0493365	0.961427	0.114256	1	ZC3H15
ENSG00000065559	0.00619557	0.994688	-0.00927974	0.994505	-0.0154753	1	MAP2K4
ENSG00000065600	0.0938401	0.84915	-0.0634713	0.935263	-0.157311	1	PACC1
ENSG00000065609	0.283185	0.655915	0.128566	0.921155	-0.154619	1	SNAP91
ENSG00000065613	-0.643938	0.110314	-0.467954	0.517137	0.175984	1	SLK
ENSG00000065615	-0.202639	0.581876	-0.172479	0.796304	0.0301595	1	CYB5R4
ENSG00000065618	-3.9284	NA	-0.390845	NA	3.53756	NA	COL17A1
ENSG00000065621	-1.72462	0.122213	-0.274536	0.935263	1.45008	0.979263	GSTO2
ENSG00000065665	0.310159	0.472211	0.278863	0.731576	-0.0312959	1	SEC61A2
ENSG00000065675	0.134228	0.92356	0.110447	0.963941	-0.0237807	1	PRKCQ
ENSG00000065717	-2.38581	0.0225342	-0.659102	0.8242	1.72671	0.815241	TLE2
ENSG00000065802	-0.0389056	0.945241	-0.0918437	0.892565	-0.052938	1	ASB1
ENSG00000065809	-0.0404423	0.947316	0.136287	0.8403	0.176729	1	FAM107B
ENSG00000065833	-0.533822	0.395015	-0.259813	0.847242	0.274009	1	ME1
ENSG00000065882	-0.189128	0.763571	-0.175354	0.866008	0.0137741	1	TBC1D1
ENSG00000065883	-0.0202871	0.980944	-0.195625	0.818523	-0.175338	1	CDK13
ENSG00000065911	-0.383268	0.517911	-0.0997928	0.946901	0.283476	1	MTHFD2
ENSG00000065923	-0.440174	0.472127	-0.280464	0.819823	0.15971	1	SLC9A7
ENSG00000065970	-0.1915	0.716007	-0.182301	0.830955	0.00919855	1	FOXJ2
ENSG00000065978	0.349458	0.326754	0.403614	0.41526	0.0541564	1	YBX1
ENSG00000065989	-0.434872	0.533616	-0.273872	0.843338	0.161	1	PDE4A
ENSG00000066027	-0.330434	0.597118	0.151942	0.907209	0.482375	1	PPP2R5A
ENSG00000066032	0.475316	0.308684	0.202276	0.847242	-0.273039	1	CTNNA2
ENSG00000066044	0.0299635	0.961399	0.0475394	0.9607	0.0175759	1	ELAVL1
ENSG00000066056	-0.662772	0.613229	-0.350571	0.894504	0.312202	1	TIE1
ENSG00000066084	-0.0905908	0.866921	-0.279938	0.622173	-0.189347	1	DIP2B
ENSG00000066117	0.0173128	0.977578	0.104794	0.88157	0.087481	1	SMARCD1
ENSG00000066135	-0.035391	0.951021	-0.197833	0.728297	-0.162442	1	KDM4A
ENSG00000066136	-0.0446213	0.951021	0.0811097	0.928884	0.125731	1	NFYC
ENSG00000066185	-0.429169	0.892582	-0.140401	NA	0.288768	1	ZMYND12
ENSG00000066230	-2.3883	NA	-0.408979	NA	1.97932	NA	SLC9A3
ENSG00000066248	0.41698	0.407913	0.415859	0.631179	-0.00112082	1	NGEF
ENSG00000066279	-0.495671	0.46846	-0.648517	0.516576	-0.152846	1	ASPM
ENSG00000066294	2.66626	NA	-1.15609	NA	-3.82235	1	CD84
ENSG00000066322	-0.237272	0.762369	-0.181946	0.890121	0.0553264	1	ELOVL1
ENSG00000066336	-1.62731	NA	-0.989085	NA	0.638226	1	SPI1
ENSG00000066379	-0.0564211	0.967377	0.234779	0.887493	0.2912	1	POLR1H
ENSG00000066382	0.735618	0.388529	0.516339	0.762132	-0.219279	1	MPPED2
ENSG00000066405	-0.809717	0.745819	-1.06852	NA	-0.258799	1	CLDN18
ENSG00000066422	-0.25088	0.433636	-0.386031	0.291742	-0.135151	1	ZBTB11
ENSG00000066427	-0.192719	0.586097	-0.0837131	0.910925	0.109006	1	ATXN3
ENSG00000066455	-0.0864637	0.875598	-0.0760454	0.928454	0.0104183	1	GOLGA5
ENSG00000066468	0.169779	0.79117	-0.0248229	0.987407	-0.194602	1	FGFR2
ENSG00000066557	-0.052486	0.943245	-0.00383411	0.997082	0.0486518	1	LRRC40
ENSG00000066583	0.230307	0.646949	0.172914	0.849463	-0.0573932	1	ISOC1
ENSG00000066629	-0.155931	0.840893	-0.230487	0.82387	-0.0745557	1	EML1
ENSG00000066651	0.169992	0.740967	0.106281	0.907562	-0.0637108	1	TRMT11
ENSG00000066654	-0.144615	0.680187	-0.147345	0.802119	-0.0027305	1	THUMPD1
ENSG00000066697	-0.0884644	0.920768	-0.17407	0.88288	-0.0856059	1	MSANTD3
ENSG00000066735	1.01274	0.165306	0.584058	0.719019	-0.428682	1	KIF26A
ENSG00000066739	-0.236642	0.582292	-0.377378	0.516576	-0.140736	1	ATG2B
ENSG00000066777	-0.29234	0.381345	-0.28566	0.622173	0.00668003	1	ARFGEF1
ENSG00000066813	0.501136	NA	0.290647	NA	0	1	ACSM2B
ENSG00000066827	0.00370084	0.997733	-0.0426487	0.973233	-0.0463495	1	ZFAT
ENSG00000066855	-0.0752231	0.895353	-0.0129485	0.989698	0.0622747	1	MTFR1
ENSG00000066923	0.278705	0.719926	-0.0668143	0.970583	-0.345519	1	STAG3
ENSG00000066926	-0.0377287	0.959327	-0.136169	0.872906	-0.0984405	1	FECH
ENSG00000066933	-0.199589	0.740314	-0.447756	0.516576	-0.248167	1	MYO9A
ENSG00000067048	-0.112014	0.758376	-0.144163	0.793719	-0.0321496	1	DDX3Y
ENSG00000067057	-0.430017	0.503385	-0.224113	0.870857	0.205904	1	PFKP
ENSG00000067064	-0.0659601	0.931554	-0.120802	0.901947	-0.0548418	1	IDI1
ENSG00000067066	-1.48908	0.312783	-0.861771	0.790359	0.627312	1	SP100
ENSG00000067082	-0.257711	0.576769	-0.0273127	0.982578	0.230398	1	KLF6
ENSG00000067113	-0.0113555	0.991919	0.325295	0.731576	0.33665	1	PLPP1
ENSG00000067141	0.322746	0.551584	0.0281618	0.986883	-0.294585	1	NEO1
ENSG00000067167	0.0390209	0.954159	0.0544111	0.95683	0.0153901	1	TRAM1
ENSG00000067177	-0.838496	0.184757	-0.434257	0.768214	0.404239	1	PHKA1
ENSG00000067182	0.0121001	0.984055	0.148858	0.802799	0.136758	1	TNFRSF1A
ENSG00000067191	-0.293244	0.792779	0.113549	0.961781	0.406793	1	CACNB1
ENSG00000067208	-0.0500559	0.956445	-0.250069	0.793547	-0.200014	1	EVI5
ENSG00000067221	0.158857	0.758376	0.378674	0.516576	0.219817	1	STOML1
ENSG00000067225	-0.0322127	0.967858	0.0765143	0.943789	0.108727	1	PKM
ENSG00000067248	-0.270334	0.648674	-0.203554	0.850391	0.0667799	1	DHX29
ENSG00000067334	-0.181774	0.660519	-0.20793	0.757128	-0.0261559	1	DNTTIP2
ENSG00000067365	-0.176559	0.842384	0.117378	0.935263	0.293937	1	METTL22
ENSG00000067369	-0.0167973	0.983911	-0.285494	0.714336	-0.268697	1	TP53BP1
ENSG00000067445	0.206142	0.678962	0.0119359	0.990685	-0.194206	1	TRO
ENSG00000067533	-0.242605	0.624183	-0.162926	0.866008	0.0796788	1	RRP15
ENSG00000067560	0.143725	0.709072	0.255963	0.622173	0.112238	1	RHOA
ENSG00000067596	-0.0713799	0.892582	-0.212664	0.736263	-0.141284	1	DHX8
ENSG00000067601	0.09999	0.933372	0.735075	0.413174	0.635085	1	PMS2P2
ENSG00000067606	0.112989	0.920873	0.168939	0.915154	0.0559496	1	PRKCZ
ENSG00000067646	-0.129301	0.809121	-0.064327	0.948309	0.0649743	1	ZFY
ENSG00000067704	-0.232947	0.456371	-0.201451	0.73596	0.0314959	1	IARS2
ENSG00000067715	-0.135871	0.749923	-0.264908	0.629928	-0.129037	1	SYT1
ENSG00000067798	-0.890299	0.371474	-0.801026	0.664973	0.0892731	1	NAV3
ENSG00000067829	0.101311	0.84338	0.259033	0.664485	0.157722	1	IDH3G
ENSG00000067836	0.149989	0.856638	0.137993	0.90993	-0.011996	1	ROGDI
ENSG00000067840	0.450845	0.334263	0.309876	0.744699	-0.140969	1	PDZD4
ENSG00000067842	-0.533777	0.917916	-0.586038	NA	-0.052261	1	ATP2B3
ENSG00000067900	-0.498703	0.267325	-0.47925	0.516576	0.0194533	1	ROCK1
ENSG00000067955	-0.354861	0.509347	-0.233568	0.82387	0.121293	1	CBFB
ENSG00000067992	-0.267225	0.663848	-0.125845	0.920597	0.14138	1	PDK3
ENSG00000068001	0.085365	0.904625	-0.0132316	0.990611	-0.0985966	1	HYAL2
ENSG00000068024	0.250159	0.7069	-0.128811	0.920043	-0.37897	1	HDAC4
ENSG00000068028	-0.122005	0.884432	-0.1013	0.939309	0.020705	1	RASSF1
ENSG00000068078	-0.310118	0.879976	0.290688	NA	0.600806	1	FGFR3
ENSG00000068079	-1.03852	0.346414	0.707652	0.764695	1.74617	0.467465	IFI35
ENSG00000068097	-0.0374548	0.966725	0.0615683	0.966071	0.0990231	1	HEATR6
ENSG00000068120	0.0442139	0.955876	0.192764	0.812656	0.14855	1	COASY
ENSG00000068137	0.212086	0.815105	0.0922356	0.9607	-0.11985	1	PLEKHH3
ENSG00000068305	-0.500006	0.275524	-0.230796	0.82387	0.26921	1	MEF2A
ENSG00000068308	0.0885525	0.841933	0.146191	0.802119	0.057638	1	OTUD5
ENSG00000068323	-0.0291086	0.963347	0.0626875	0.942512	0.0917962	1	TFE3
ENSG00000068354	-0.110258	0.889974	-0.0451197	0.973772	0.0651388	1	TBC1D25
ENSG00000068366	-0.54514	0.435087	-0.464747	0.728702	0.0803926	1	ACSL4
ENSG00000068383	0.038195	0.954983	0.0196176	0.9865	-0.0185773	1	INPP5A
ENSG00000068394	-0.0344604	0.958039	-0.0443956	0.964615	-0.00993525	1	GPKOW
ENSG00000068400	-0.170774	0.754003	-0.20562	0.802799	-0.0348458	1	GRIPAP1
ENSG00000068438	-0.112016	0.858671	0.178528	0.828042	0.290544	1	FTSJ1
ENSG00000068489	-0.237969	0.822481	-0.554057	0.666403	-0.316087	1	PRR11
ENSG00000068615	0.656987	0.300805	0.347437	0.801232	-0.30955	1	REEP1
ENSG00000068650	-0.0921923	0.933372	-0.0490433	0.976529	0.043149	1	ATP11A
ENSG00000068654	-0.150654	0.819609	-0.25642	0.774695	-0.105766	1	POLR1A
ENSG00000068697	-0.111227	0.84915	-0.187801	0.80533	-0.0765738	1	LAPTM4A
ENSG00000068724	0.0936835	0.934845	0.195686	0.889672	0.102002	1	TTC7A
ENSG00000068745	0.00473915	0.993703	0.00599677	0.993732	0.00125762	1	IP6K2
ENSG00000068781	0.0314246	0.992557	0.567494	NA	0.53607	1	STON1-GTF2A1L
ENSG00000068784	0.0189956	0.97653	-0.172874	0.793719	-0.191869	1	SRBD1
ENSG00000068796	-0.0869636	0.893038	-0.182111	0.82387	-0.0951471	1	KIF2A
ENSG00000068831	1.96784	0.0894397	1.57414	NA	-0.3937	1	RASGRP2
ENSG00000068878	-0.314514	0.617207	-0.236602	0.838916	0.0779118	1	PSME4
ENSG00000068885	-0.167158	0.818148	-0.0660079	0.964761	0.10115	1	IFT80
ENSG00000068903	0.0973193	0.85616	0.26405	0.666403	0.16673	1	SIRT2
ENSG00000068912	-0.00391681	0.994688	-0.0992585	0.875951	-0.0953417	1	ERLEC1
ENSG00000068971	0.388979	0.313919	0.144402	0.876981	-0.244577	1	PPP2R5B
ENSG00000068976	0.14101	0.964548	0.0319969	NA	-0.109013	1	PYGM
ENSG00000068985	NA	NA	NA	NA	NA	NA	PAGE1
ENSG00000069011	-1.72265	0.608915	1.38582	0.822445	3.10846	1	PITX1
ENSG00000069018	0	NA	-3.33112	NA	-2.87048	1	TRPC7
ENSG00000069020	-0.341655	0.442187	-0.345456	0.661355	-0.00380093	1	MAST4
ENSG00000069122	-7.0164	NA	16.3409	NA	23.3573	NA	ADGRF5
ENSG00000069188	0.465094	0.546174	-0.126744	0.946901	-0.591838	1	SDK2
ENSG00000069206	-2.77697	NA	0	NA	2.10583	1	ADAM7
ENSG00000069248	0.173106	0.668037	0.0598443	0.946901	-0.113262	1	NUP133
ENSG00000069275	-0.0769615	0.907531	-0.216367	0.791042	-0.139405	1	NUCKS1
ENSG00000069329	0.0526092	0.920768	-0.0409683	0.964761	-0.0935774	1	VPS35
ENSG00000069345	-0.0546929	0.904962	-0.104016	0.866008	-0.049323	1	DNAJA2
ENSG00000069399	-0.910947	0.338638	-0.114634	0.970583	0.796313	1	BCL3
ENSG00000069424	0.084632	0.922857	-0.0477247	0.973233	-0.132357	1	KCNAB2
ENSG00000069431	-0.235532	0.882682	-0.363936	0.86868	-0.128404	1	ABCC9
ENSG00000069482	-2.23262	NA	-2.76237	NA	-0.529744	1	GAL
ENSG00000069493	-0.0258899	0.988004	0.106137	0.966219	0.132026	1	CLEC2D
ENSG00000069509	0.0868351	0.869572	0.180533	0.791368	0.0936977	1	FUNDC1
ENSG00000069535	-1.42207	0.313919	-0.0847263	NA	1.33734	1	MAOB
ENSG00000069667	0.402831	0.525379	0.130261	0.929417	-0.27257	1	RORA
ENSG00000069696	0.744975	0.527129	0.834201	NA	0.0892256	1	DRD4
ENSG00000069702	-0.955365	0.311037	-0.545278	0.792437	0.410087	1	TGFBR3
ENSG00000069712	-0.202763	0.903346	-0.430544	0.838916	-0.22778	1	NA
ENSG00000069764	-2.71347	NA	-0.496465	NA	2.21701	1	PLA2G10
ENSG00000069812	-1.75654	NA	0.846016	NA	2.60256	1	HES2
ENSG00000069849	0.123599	0.763571	-0.0473508	0.958793	-0.170949	1	ATP1B3
ENSG00000069869	-0.879568	0.252681	-0.586667	0.719019	0.292901	1	NEDD4
ENSG00000069943	-0.156081	0.873592	0.077318	0.969456	0.233399	1	PIGB
ENSG00000069956	-0.169298	0.787138	-0.104091	0.925359	0.0652066	1	MAPK6
ENSG00000069966	0.273359	0.522425	-0.00722497	0.994896	-0.280584	1	GNB5
ENSG00000069974	-0.641428	0.2638	-0.209907	0.885345	0.431521	1	RAB27A
ENSG00000069998	0.235215	0.669437	0.252251	0.790359	0.0170357	1	HDHD5
ENSG00000070010	-0.0474779	0.959417	0.0284423	0.985374	0.0759202	1	UFD1
ENSG00000070018	-0.0859305	0.912681	-0.268846	0.771229	-0.182916	1	LRP6
ENSG00000070019	-1.97129	NA	1.72183	NA	3.69313	1	GUCY2C
ENSG00000070031	3.83524	NA	0.920256	NA	-2.91499	1	SCT
ENSG00000070047	-0.173517	0.788686	-0.240489	0.793719	-0.0669721	1	PHRF1
ENSG00000070061	-0.0706549	0.875202	-0.0878048	0.890121	-0.01715	1	ELP1
ENSG00000070081	0.00611151	0.994688	-0.17728	0.844944	-0.183392	1	NUCB2
ENSG00000070087	0.0572916	0.920768	0.19065	0.775787	0.133358	1	PFN2
ENSG00000070159	-0.42922	0.652666	0.00271932	0.998176	0.431939	1	PTPN3
ENSG00000070182	-2.08028	0.127375	-0.512548	0.893651	1.56773	1	SPTB
ENSG00000070190	-5.62955	NA	-1.33984	NA	4.28972	NA	DAPP1
ENSG00000070193	-0.410935	NA	-2.15608	NA	-1.74515	1	FGF10
ENSG00000070214	0.218621	0.669437	-0.0213812	0.988449	-0.240002	1	SLC44A1
ENSG00000070269	0.128492	0.836546	-0.0906375	0.927556	-0.21913	1	TMEM260
ENSG00000070366	-0.00921184	0.990537	0.0381302	0.970399	0.047342	1	SMG6
ENSG00000070367	-0.0501084	0.952314	-0.147006	0.880632	-0.0968979	1	EXOC5
ENSG00000070371	-0.0792058	0.893273	0.0359255	0.973233	0.115131	1	CLTCL1
ENSG00000070388	0.247414	0.964548	-0.700248	NA	-0.947662	1	FGF22
ENSG00000070404	0.0177019	0.9847	0.0197549	0.989315	0.00205302	1	FSTL3
ENSG00000070413	0.310758	0.513571	0.0934476	0.93482	-0.217311	1	DGCR2
ENSG00000070423	0.259724	0.66297	0.329749	0.731576	0.0700254	1	RNF126
ENSG00000070444	-0.0323817	0.96972	-0.00397776	0.997832	0.0284039	1	MNT
ENSG00000070476	0.0214377	0.975341	0.0649196	0.943576	0.0434819	1	ZXDC
ENSG00000070495	-0.326812	0.545541	-0.187992	0.866008	0.13882	1	JMJD6
ENSG00000070501	-0.126887	0.835715	0.100966	0.917945	0.227853	1	POLB
ENSG00000070526	-5.87784	NA	0	NA	5.2067	1	ST6GALNAC1
ENSG00000070540	-0.307686	0.505554	-0.0601938	0.96429	0.247492	1	WIPI1
ENSG00000070601	0.0050724	0.99896	0.0173408	NA	0.0122684	1	FRMPD1
ENSG00000070610	-0.00399682	0.996932	-0.056584	0.966071	-0.0525871	1	GBA2
ENSG00000070614	-0.0522409	0.950968	-0.129486	0.895196	-0.0772455	1	NDST1
ENSG00000070669	-0.480353	0.505507	0.0130897	0.994896	0.493443	1	ASNS
ENSG00000070718	-0.0562675	0.934718	-0.0345745	0.973233	0.021693	1	AP3M2
ENSG00000070729	-1.50378	0.716795	-0.743602	NA	0.760175	1	CNGB1
ENSG00000070731	-2.401	0.249293	0.398042	NA	2.79904	0.815241	ST6GALNAC2
ENSG00000070748	-1.19217	NA	2.13709	NA	3.32927	1	CHAT
ENSG00000070756	-0.332547	0.432986	0.0835628	0.935263	0.416109	1	PABPC1
ENSG00000070759	0.220124	0.875205	0.133434	NA	-0.0866899	1	TESK2
ENSG00000070761	0.0657619	0.882707	0.100514	0.872792	0.0347526	1	CFAP20
ENSG00000070770	-0.152309	0.71879	-0.18737	0.776432	-0.0350612	1	CSNK2A2
ENSG00000070778	0.00364095	0.996932	-0.129872	0.884423	-0.133513	1	PTPN21
ENSG00000070785	-0.242787	0.653253	-0.129351	0.903542	0.113436	1	EIF2B3
ENSG00000070808	0.37172	0.702418	0.169638	0.929681	-0.202082	1	CAMK2A
ENSG00000070814	-0.208519	0.803876	-0.428395	0.68934	-0.219876	1	TCOF1
ENSG00000070831	0.0944167	0.854492	0.106332	0.885925	0.0119149	1	CDC42
ENSG00000070882	-0.130147	0.857629	-0.00812043	0.994896	0.122027	1	OSBPL3
ENSG00000070886	3.46818	0.374793	3.25765	NA	-0.210532	1	EPHA8
ENSG00000070915	0.501171	NA	0.290647	NA	0	1	SLC12A3
ENSG00000070950	-0.160114	0.789581	-0.251672	0.765091	-0.0915577	1	RAD18
ENSG00000070961	0.160092	0.812023	-0.17382	0.866008	-0.333911	1	ATP2B1
ENSG00000070985	0.501144	NA	-0.671141	NA	-1.17229	1	TRPM5
ENSG00000071051	0.121785	0.870102	-0.06088	0.966071	-0.182665	1	NCK2
ENSG00000071054	-0.155026	0.756986	-0.387833	0.442775	-0.232807	1	MAP4K4
ENSG00000071073	0.109594	0.920081	0.0626947	0.973018	-0.0468992	1	MGAT4A
ENSG00000071082	0.0621381	0.947905	0.209685	0.84061	0.147547	1	RPL31
ENSG00000071127	-0.103342	0.849312	0.0221859	0.983179	0.125528	1	WDR1
ENSG00000071189	0.0387248	0.955192	-0.0759823	0.928982	-0.114707	1	SNX13
ENSG00000071203	NA	NA	NA	NA	NA	NA	MS4A12
ENSG00000071205	-1.12414	0.250375	-0.496841	0.82387	0.627303	1	ARHGAP10
ENSG00000071242	-0.241618	0.743643	-0.0699604	0.96956	0.171657	1	RPS6KA2
ENSG00000071243	0.0324972	0.961399	0.0597531	0.949907	0.0272559	1	ING3
ENSG00000071246	0.288906	0.5336	0.0905145	0.934574	-0.198392	1	VASH1
ENSG00000071282	0.153292	0.816846	0.168479	0.866008	0.0151866	1	LMCD1
ENSG00000071462	-0.088319	0.917191	0.0737859	0.9607	0.162105	1	BUD23
ENSG00000071537	-0.211329	0.745221	-0.234861	0.813812	-0.0235318	1	SEL1L
ENSG00000071539	-0.493873	0.304871	-0.0385278	0.980654	0.455345	1	TRIP13
ENSG00000071553	0.193439	0.614106	0.103455	0.892565	-0.0899845	1	ATP6AP1
ENSG00000071564	0.140542	0.792779	0.0707127	0.942512	-0.0698296	1	TCF3
ENSG00000071575	0.000261625	0.999642	-0.0994209	0.926833	-0.0996825	1	TRIB2
ENSG00000071626	-0.325662	0.576769	-0.070002	0.964761	0.25566	1	DAZAP1
ENSG00000071655	0.18058	0.792779	0.151048	0.892565	-0.0295321	1	MBD3
ENSG00000071677	0	NA	-1.63293	NA	-1.17231	1	PRLH
ENSG00000071794	-0.17482	0.822787	-0.219141	0.841975	-0.0443211	1	HLTF
ENSG00000071859	0.167866	0.731185	0.130812	0.880632	-0.0370542	1	FAM50A
ENSG00000071889	0.185224	0.611047	0.358247	0.386274	0.173023	1	FAM3A
ENSG00000071894	-0.171862	0.808047	0.0702385	0.961781	0.2421	1	CPSF1
ENSG00000071909	-0.66318	0.710932	-0.0795825	NA	0.583598	1	MYO3B
ENSG00000071967	0.324136	0.504742	0.0859457	0.942512	-0.23819	1	CYBRD1
ENSG00000071991	-6.84103	0.539723	0	NA	6.16989	1	CDH19
ENSG00000071994	0.279853	0.385274	0.321153	0.516576	0.0413002	1	PDCD2
ENSG00000072041	0.0376375	0.962605	-0.117853	0.903542	-0.155491	1	SLC6A15
ENSG00000072042	0.0758375	0.891936	0.0031112	0.997493	-0.0727263	1	RDH11
ENSG00000072062	0.0911524	0.833286	0.0952301	0.883994	0.00407771	1	PRKACA
ENSG00000072071	0.311877	0.521205	-0.0604567	0.965652	-0.372334	1	ADGRL1
ENSG00000072080	NA	NA	NA	NA	NA	NA	SPP2
ENSG00000072110	-0.0692963	0.925725	-0.0010792	0.998815	0.0682171	1	ACTN1
ENSG00000072121	-0.0872845	0.846481	-0.227703	0.66328	-0.140419	1	ZFYVE26
ENSG00000072133	0.204357	0.801322	-0.335519	0.762132	-0.539877	1	RPS6KA6
ENSG00000072134	-0.129887	0.862043	-0.143804	0.892565	-0.0139166	1	EPN2
ENSG00000072135	0.116329	0.834801	0.227616	0.750201	0.111288	1	PTPN18
ENSG00000072163	-0.0267491	0.987766	-0.155013	0.940452	-0.128264	1	LIMS2
ENSG00000072182	-0.258547	NA	0.968142	NA	1.22669	1	ASIC4
ENSG00000072195	0.258557	0.611047	0.192859	0.837801	-0.0656978	1	SPEG
ENSG00000072201	-0.143883	0.88511	0.0170772	0.99092	0.16096	1	LNX1
ENSG00000072210	0.0421518	0.931365	0.0582372	0.929681	0.0160854	1	ALDH3A2
ENSG00000072274	-0.327931	0.430295	-0.344439	0.622173	-0.0165082	1	TFRC
ENSG00000072310	0.053805	0.94646	0.143416	0.88157	0.0896109	1	SREBF1
ENSG00000072315	-2.20284	NA	-1.08925	NA	1.11358	1	TRPC5
ENSG00000072364	-0.181676	0.736123	-0.385083	0.541292	-0.203408	1	AFF4
ENSG00000072401	0.172594	0.689383	0.179283	0.802119	0.00668925	1	UBE2D1
ENSG00000072415	-0.134316	0.811059	-0.142713	0.86868	-0.00839734	1	PALS1
ENSG00000072422	-0.0411582	0.96261	-0.0749251	0.953408	-0.0337669	1	RHOBTB1
ENSG00000072501	-0.00757661	0.993153	-0.289388	0.693113	-0.281811	1	SMC1A
ENSG00000072506	0.321616	0.417949	0.388222	0.516576	0.0666055	1	HSD17B10
ENSG00000072518	0.109034	0.864117	0.0127032	0.990318	-0.0963307	1	MARK2
ENSG00000072571	-0.264361	0.742798	-0.241838	0.85769	0.0225236	1	HMMR
ENSG00000072609	-0.184064	0.783901	0.0807826	0.950309	0.264847	1	CHFR
ENSG00000072657	-1.22381	0.433636	-0.765572	0.808978	0.458237	1	TRHDE
ENSG00000072682	-0.256883	0.582906	-0.214846	0.800316	0.0420368	1	P4HA2
ENSG00000072694	-1.52002	NA	-3.30883	NA	-1.78881	1	FCGR2B
ENSG00000072736	-0.087996	0.905479	-0.1419	0.889672	-0.0539042	1	NFATC3
ENSG00000072756	-0.145842	0.709354	-0.0704611	0.92704	0.0753804	1	TRNT1
ENSG00000072778	-0.0768657	0.959436	0.341942	0.830955	0.418807	1	ACADVL
ENSG00000072786	-0.299092	0.539723	-0.136032	0.895196	0.16306	1	STK10
ENSG00000072803	0.18338	0.66201	-0.000977992	0.998683	-0.184358	1	FBXW11
ENSG00000072818	-0.125033	0.951873	0.328304	0.892565	0.453337	1	ACAP1
ENSG00000072832	0.220704	0.33294	0.115576	0.812656	-0.105128	1	CRMP1
ENSG00000072840	-0.158713	0.880117	-0.417218	0.743565	-0.258505	1	EVC
ENSG00000072849	0.0779044	0.872536	0.0793098	0.910451	0.00140544	1	DERL2
ENSG00000072858	-2.37564	0.380394	-1.16431	NA	1.21133	1	SIDT1
ENSG00000072864	-0.165135	0.823583	-0.237975	0.812656	-0.0728402	1	NDE1
ENSG00000072952	0.472001	0.462279	0.155626	0.918675	-0.316375	1	IRAG1
ENSG00000072954	0.176654	0.86444	-0.0607171	0.973233	-0.237371	1	TMEM38A
ENSG00000072958	0.0885452	0.845212	0.220842	0.685063	0.132297	1	AP1M1
ENSG00000073008	-0.545436	0.308233	-0.331343	0.771229	0.214093	1	PVR
ENSG00000073050	0.168311	0.636672	-0.0208367	0.982484	-0.189148	1	XRCC1
ENSG00000073060	-0.10404	0.891936	-0.0252114	0.987692	0.0788288	1	SCARB1
ENSG00000073067	0.501166	NA	-1.44254	NA	-1.94371	1	CYP2W1
ENSG00000073111	0.0210772	0.972742	0.0109603	0.990239	-0.0101169	1	MCM2
ENSG00000073146	0.559528	0.75573	-0.321235	NA	-0.880763	1	MOV10L1
ENSG00000073150	-0.354099	0.743344	-0.308806	0.866008	0.0452926	1	PANX2
ENSG00000073169	-0.203055	0.825922	-0.00257122	0.998176	0.200484	1	SELENOO
ENSG00000073282	-4.31315	NA	2.45657	NA	6.76971	NA	TP63
ENSG00000073331	-0.367176	0.466788	-0.101125	0.935263	0.266051	1	ALPK1
ENSG00000073350	-7.49555	NA	-0.614645	NA	6.88091	NA	LLGL2
ENSG00000073417	-0.49475	0.427149	-0.175046	0.903663	0.319705	1	PDE8A
ENSG00000073464	-0.0287876	0.97088	-0.184003	0.828042	-0.155215	1	CLCN4
ENSG00000073536	-0.0577486	0.916069	0.0658024	0.935263	0.123551	1	NLE1
ENSG00000073578	-0.361357	0.519229	-0.126823	0.921155	0.234534	1	SDHA
ENSG00000073584	0.0639699	0.914642	-0.0542076	0.959309	-0.118177	1	SMARCE1
ENSG00000073598	1.53104	0.510762	-0.142302	NA	-1.67334	1	FNDC8
ENSG00000073605	-1.44218	0.334263	0.555612	NA	1.99779	0.791175	GSDMB
ENSG00000073614	-0.178041	0.552972	-0.422846	0.0652547	-0.244805	1	KDM5A
ENSG00000073670	0.520568	0.731786	0.808714	0.722096	0.288146	1	ADAM11
ENSG00000073711	-0.195203	0.672106	-0.1524	0.856028	0.042803	1	PPP2R3A
ENSG00000073712	-0.0850784	0.916651	-0.0343749	0.981603	0.0507035	1	FERMT2
ENSG00000073734	NA	NA	NA	NA	NA	NA	ABCB11
ENSG00000073737	-3.70921	NA	-1.63293	NA	2.07628	1	DHRS9
ENSG00000073754	NA	NA	NA	NA	NA	NA	CD5L
ENSG00000073756	-1.34224	0.394157	-0.462868	0.90053	0.879377	1	PTGS2
ENSG00000073792	-0.191751	0.796921	-0.244545	0.822323	-0.0527935	1	IGF2BP2
ENSG00000073803	0.170602	0.738426	0.341363	0.590282	0.170761	1	MAP3K13
ENSG00000073849	0.416695	0.312783	0.191565	0.834439	-0.22513	1	ST6GAL1
ENSG00000073861	-3.74938	NA	-2.88977	NA	0.859609	1	TBX21
ENSG00000073905	-0.356556	0.872792	-0.325719	NA	0.0308371	1	NA
ENSG00000073910	0.0185777	0.98315	-0.0346369	0.978619	-0.0532146	1	FRY
ENSG00000073921	-0.198868	0.634163	-0.0834365	0.926806	0.115431	1	PICALM
ENSG00000073969	-0.0291778	0.973808	0.0296119	0.982612	0.0587897	1	NSF
ENSG00000074047	-0.228712	0.841894	-0.235206	0.889672	-0.00649385	1	GLI2
ENSG00000074054	-0.0403118	0.959436	-0.151046	0.867181	-0.110734	1	CLASP1
ENSG00000074071	0.237065	0.614872	0.245347	0.764401	0.00828191	1	MRPS34
ENSG00000074181	0.241278	0.708705	-0.108339	0.932933	-0.349617	1	NOTCH3
ENSG00000074201	0.246135	0.336883	0.249795	0.54798	0.00366053	1	CLNS1A
ENSG00000074211	0.327568	0.863586	0.287612	NA	-0.0399567	1	PPP2R2C
ENSG00000074219	0.0285825	0.967858	0.0710816	0.939932	0.0424991	1	TEAD2
ENSG00000074266	-0.106661	0.879021	-0.154511	0.875951	-0.0478502	1	EED
ENSG00000074276	-0.526648	0.827234	-0.0387809	NA	0.487867	1	CDHR2
ENSG00000074317	0.0357983	0.987256	0.661532	NA	0.625734	1	SNCB
ENSG00000074319	-0.0521291	0.912108	-0.0129571	0.988674	0.039172	1	TSG101
ENSG00000074356	-0.0905549	0.857629	-0.235698	0.685063	-0.145143	1	NCBP3
ENSG00000074370	-0.296865	0.863586	-0.728109	NA	-0.431244	1	ATP2A3
ENSG00000074410	0.0549865	0.954159	-0.238692	0.808939	-0.293679	1	CA12
ENSG00000074416	-0.533084	0.49533	-0.195819	0.911683	0.337265	1	MGLL
ENSG00000074527	-1.08161	0.231895	-0.469201	0.823737	0.612404	1	NTN4
ENSG00000074582	-0.0986089	0.897946	0.0388542	0.976529	0.137463	1	BCS1L
ENSG00000074590	0.214885	0.685607	0.0337756	0.9791	-0.18111	1	NUAK1
ENSG00000074603	-0.00543544	0.994688	-0.175227	0.823352	-0.169791	1	DPP8
ENSG00000074621	-0.350882	0.604768	-0.108092	0.946257	0.24279	1	SLC24A1
ENSG00000074657	-0.216823	0.663848	-0.260586	0.747922	-0.0437628	1	ZNF532
ENSG00000074660	-1.04804	0.823583	0.197968	NA	1.24601	1	SCARF1
ENSG00000074695	-0.356969	0.488339	-0.342938	0.718305	0.0140314	1	LMAN1
ENSG00000074696	0.118129	0.804755	-0.019929	0.985223	-0.138058	1	HACD3
ENSG00000074706	-0.404546	0.904962	-0.95744	NA	-0.552894	1	IPCEF1
ENSG00000074755	-0.213789	0.590112	-0.361849	0.470069	-0.14806	1	ZZEF1
ENSG00000074771	2.92868	NA	1.75641	NA	-1.17227	1	NOX3
ENSG00000074800	-0.0183431	0.987374	0.224586	0.84418	0.242929	1	ENO1
ENSG00000074803	0.485553	0.890655	3.12238	NA	2.63683	1	SLC12A1
ENSG00000074842	0.0215082	0.985041	-0.134983	0.920597	-0.156492	1	MYDGF
ENSG00000074855	0.0994744	0.903631	-0.165721	0.883884	-0.265195	1	ANO8
ENSG00000074935	-0.156273	0.862943	0.156631	0.905792	0.312904	1	TUBE1
ENSG00000074964	0.344851	0.5171	0.154903	0.892565	-0.189948	1	ARHGEF10L
ENSG00000074966	0.653086	0.883659	0.0332977	NA	-0.619789	1	TXK
ENSG00000075035	0.407548	0.670223	0.182092	0.926849	-0.225455	1	WSCD2
ENSG00000075043	0.674622	0.123754	0.449702	0.616398	-0.22492	1	KCNQ2
ENSG00000075073	-0.522663	0.831391	-0.160255	NA	0.362408	1	TACR2
ENSG00000075089	0.129486	0.884238	-0.117556	0.932024	-0.247042	1	ACTR6
ENSG00000075131	-0.264991	0.731584	-0.0781545	0.966357	0.186836	1	TIPIN
ENSG00000075142	0.25052	0.406241	0.23758	0.664973	-0.0129397	1	SRI
ENSG00000075151	-0.00359124	0.997526	-0.268158	0.740552	-0.264566	1	EIF4G3
ENSG00000075188	-0.183388	0.803926	0.110477	0.931226	0.293864	1	NUP37
ENSG00000075213	-0.894468	0.203304	-0.554542	0.719019	0.339927	1	SEMA3A
ENSG00000075218	-0.0806795	0.920768	-0.238631	0.802119	-0.157952	1	GTSE1
ENSG00000075223	-0.36849	0.507973	-0.0892853	0.949842	0.279204	1	SEMA3C
ENSG00000075234	0.0884388	0.863586	0.156694	0.810549	0.0682552	1	TTC38
ENSG00000075239	-0.0836636	0.872792	-0.0595436	0.944344	0.0241199	1	ACAT1
ENSG00000075240	0.088524	0.911329	-0.290171	0.750767	-0.378695	1	GRAMD4
ENSG00000075275	0.232361	0.755418	-0.0811945	0.9607	-0.313556	1	CELSR1
ENSG00000075290	-0.436813	0.928187	-1.1303	NA	-0.693486	1	WNT8B
ENSG00000075292	-0.134089	0.773693	-0.398942	0.342255	-0.264853	1	ZNF638
ENSG00000075303	-0.0118589	0.991919	-0.00673369	0.996419	0.00512518	1	SLC25A40
ENSG00000075336	-0.0438131	0.942005	-0.0385347	0.970399	0.00527848	1	TIMM21
ENSG00000075340	0.337335	0.544046	0.113716	0.928454	-0.223619	1	ADD2
ENSG00000075388	NA	NA	NA	NA	NA	NA	FGF4
ENSG00000075391	-0.468984	0.206158	-0.479749	0.368398	-0.0107651	1	RASAL2
ENSG00000075399	0.346227	0.418956	0.312211	0.693113	-0.0340155	1	VPS9D1
ENSG00000075407	-0.368696	0.407913	-0.434006	0.516576	-0.0653094	1	ZNF37A
ENSG00000075413	0.136302	0.614473	0.0423865	0.946901	-0.0939158	1	MARK3
ENSG00000075415	-0.0015178	0.998155	0.134469	0.85097	0.135987	1	SLC25A3
ENSG00000075420	-0.248992	0.611047	-0.377525	0.585516	-0.128532	1	FNDC3B
ENSG00000075426	-0.350505	0.47958	-0.0710607	0.9607	0.279444	1	FOSL2
ENSG00000075429	1.06495	0.279379	0.246831	0.925359	-0.818121	1	CACNG5
ENSG00000075461	0.234246	0.52207	0.173739	0.803692	-0.060507	1	CACNG4
ENSG00000075539	-0.126242	0.826216	-0.30775	0.648939	-0.181509	1	FRYL
ENSG00000075568	-0.115655	0.902745	-0.20545	0.873557	-0.0897948	1	TMEM131
ENSG00000075618	0.00597141	0.995353	0.0890505	0.942512	0.0830791	1	FSCN1
ENSG00000075624	-0.098508	0.88511	0.21319	0.804098	0.311698	1	ACTB
ENSG00000075643	-1.62101	0.407233	-0.101233	NA	1.51978	1	MOCOS
ENSG00000075651	0.518509	0.379854	0.120438	0.935263	-0.398071	1	PLD1
ENSG00000075673	-0.463942	NA	3.30796	NA	3.7719	1	ATP12A
ENSG00000075702	0.122515	0.875167	-0.0342193	0.982392	-0.156734	1	WDR62
ENSG00000075711	-0.107712	0.876209	-0.125729	0.900139	-0.0180172	1	DLG1
ENSG00000075785	-0.0845566	0.856221	-0.0883351	0.895196	-0.00377848	1	RAB7A
ENSG00000075790	0.0605179	0.906144	0.0519148	0.950309	-0.00860312	1	BCAP29
ENSG00000075826	-1.18583	0.267192	0.0190807	NA	1.20491	1	SEC31B
ENSG00000075856	0.0249543	0.961399	-0.213354	0.657756	-0.238308	1	SART3
ENSG00000075884	2.59215	NA	2.28226	NA	-0.309889	1	ARHGAP15
ENSG00000075886	-1.92537	0.403611	-0.514179	NA	1.41119	1	TUBA3D
ENSG00000075891	0.0714603	0.992331	-1.07874	NA	-1.15021	1	PAX2
ENSG00000075914	0.157735	0.83474	0.144014	0.900952	-0.0137204	1	EXOSC7
ENSG00000075945	0.0339466	0.96375	0.00941464	0.993411	-0.0245319	1	KIFAP3
ENSG00000075975	-0.0382764	0.940528	-0.0408375	0.9607	-0.00256108	1	MKRN2
ENSG00000076003	-0.0891704	0.872793	0.0755696	0.929681	0.16474	1	MCM6
ENSG00000076043	-0.195083	0.767545	-0.258793	0.793719	-0.0637101	1	REXO2
ENSG00000076053	0.00110588	0.998699	-0.058641	0.9607	-0.0597469	1	RBM7
ENSG00000076067	-0.210663	0.697561	-0.185016	0.84061	0.0256464	1	RBMS2
ENSG00000076108	-0.257091	0.430295	-0.299686	0.545238	-0.0425945	1	BAZ2A
ENSG00000076201	-0.0159903	0.98315	-0.00310747	0.997832	0.0128829	1	PTPN23
ENSG00000076242	0.068318	0.888235	-0.00328353	0.996602	-0.0716015	1	MLH1
ENSG00000076248	0.0781369	0.874263	0.11125	0.873557	0.0331132	1	UNG
ENSG00000076258	-0.0192549	0.992331	0.599249	0.724638	0.618504	1	FMO4
ENSG00000076321	0.0185928	0.982405	-0.171307	0.84187	-0.1899	1	KLHL20
ENSG00000076344	0.68481	0.375038	0.499939	0.744699	-0.184871	1	RGS11
ENSG00000076351	0.266341	0.793329	0.484106	0.731576	0.217764	1	SLC46A1
ENSG00000076356	0.294048	0.677715	0.0206798	0.990239	-0.273369	1	PLXNA2
ENSG00000076382	-0.169083	0.783916	-0.31482	0.703036	-0.145738	1	SPAG5
ENSG00000076513	-0.267366	0.614378	-0.140974	0.895169	0.126391	1	ANKRD13A
ENSG00000076554	-1.88019	NA	-0.214014	NA	1.66617	NA	TPD52
ENSG00000076555	0.0715261	0.949095	-0.331236	0.773091	-0.402762	1	ACACB
ENSG00000076604	0.0394335	0.97653	-0.0441747	0.982578	-0.0836082	1	TRAF4
ENSG00000076641	0.278729	0.594134	-0.00226391	0.998176	-0.280993	1	PAG1
ENSG00000076650	-0.310828	0.334263	-0.369239	0.413174	-0.0584113	1	GPATCH1
ENSG00000076662	1.97516	NA	-0.231012	NA	-2.20617	1	ICAM3
ENSG00000076685	-0.171183	0.652666	-0.0632441	0.937689	0.107939	1	NT5C2
ENSG00000076706	-0.0264621	0.979474	-0.120365	0.923189	-0.0939032	1	MCAM
ENSG00000076716	-0.0751043	0.879126	-0.0261425	0.976405	0.0489618	1	GPC4
ENSG00000076770	-0.619438	0.25173	-0.145104	0.920597	0.474334	1	MBNL3
ENSG00000076826	0.384234	0.699115	0.513549	0.743152	0.129315	1	CAMSAP3
ENSG00000076864	0.417448	0.694421	0.476152	0.787804	0.0587044	1	RAP1GAP
ENSG00000076924	0.0798375	0.886394	0.0649996	0.942512	-0.014838	1	XAB2
ENSG00000076928	-0.517769	0.338432	-0.211623	0.867181	0.306147	1	ARHGEF1
ENSG00000076944	-5.27428	NA	-0.516142	NA	4.75814	NA	STXBP2
ENSG00000076984	0.161158	0.794941	0.0796843	0.945191	-0.0814734	1	MAP2K7
ENSG00000077009	1.17225	0.811841	1.58482	NA	0.412565	1	NMRK2
ENSG00000077044	-0.11145	0.797307	-0.0995705	0.885925	0.0118794	1	DGKD
ENSG00000077063	-0.0760023	0.968217	-0.440405	NA	-0.364403	1	CTTNBP2
ENSG00000077080	1.57049	0.111452	1.35339	0.364236	-0.217103	1	ACTL6B
ENSG00000077092	-0.660773	0.627422	-0.908102	0.678242	-0.247329	1	RARB
ENSG00000077097	0.18784	0.77746	-0.04744	0.973018	-0.23528	1	TOP2B
ENSG00000077147	0.0302243	0.962356	-0.141162	0.84061	-0.171386	1	TM9SF3
ENSG00000077150	-0.198825	0.730367	-0.00249339	0.998176	0.196332	1	NFKB2
ENSG00000077152	-0.0249899	0.974403	-0.131642	0.883994	-0.106653	1	UBE2T
ENSG00000077157	0.0112973	0.991919	-0.154482	0.887493	-0.165779	1	PPP1R12B
ENSG00000077232	-0.310738	0.54373	-0.266049	0.780856	0.0446894	1	DNAJC10
ENSG00000077235	0.0418628	0.953401	-0.113076	0.889761	-0.154939	1	GTF3C1
ENSG00000077238	-0.585935	0.372409	-0.319371	0.818058	0.266564	1	IL4R
ENSG00000077254	-0.120917	0.84927	-0.133156	0.885925	-0.0122391	1	USP33
ENSG00000077264	-0.169507	0.792775	-0.22055	0.812656	-0.0510438	1	PAK3
ENSG00000077274	-0.372377	NA	3.23041	NA	3.60279	1	CAPN6
ENSG00000077279	0.696756	0.655441	0.387068	0.89877	-0.309688	1	DCX
ENSG00000077312	0.0241558	0.970182	0.337744	0.516576	0.313588	1	SNRPA
ENSG00000077327	0.184923	0.971932	-0.825692	NA	-1.01062	1	SPAG6
ENSG00000077348	-0.113387	0.93608	0.285797	0.866008	0.399184	1	EXOSC5
ENSG00000077380	0.116192	0.792052	0.0338955	0.970583	-0.0822966	1	DYNC1I2
ENSG00000077420	-2.23749	NA	-1.97691	NA	0.260581	1	APBB1IP
ENSG00000077454	-0.189725	0.872059	0.126151	0.949304	0.315876	1	LRCH4
ENSG00000077458	-0.232538	0.677715	-0.316972	0.722096	-0.0844345	1	FAM76B
ENSG00000077463	0.227515	0.757891	0.273094	0.806943	0.0455789	1	SIRT6
ENSG00000077498	0.614099	NA	0.365943	NA	-0.248155	1	TYR
ENSG00000077514	-0.0444865	0.945521	-0.0342234	0.972605	0.0102631	1	POLD3
ENSG00000077522	0.490392	0.908072	-0.261543	NA	-0.751935	1	ACTN2
ENSG00000077549	0.137932	0.792779	0.0642041	0.948636	-0.0737275	1	CAPZB
ENSG00000077585	0.24751	0.57987	0.296801	0.688461	0.0492913	1	GPR137B
ENSG00000077616	0.231856	0.762011	-0.0863889	0.959458	-0.318245	1	NAALAD2
ENSG00000077684	-0.0496051	0.947436	-0.164999	0.841774	-0.115394	1	JADE1
ENSG00000077713	-0.400253	0.528191	-0.0931968	0.959257	0.307056	1	SLC25A43
ENSG00000077721	0.00201089	0.998079	0.0114094	0.989665	0.00939854	1	UBE2A
ENSG00000077782	0.405911	0.252681	0.0833611	0.932498	-0.32255	1	FGFR1
ENSG00000077800	-4.47248	NA	0	NA	3.80134	1	FKBP6
ENSG00000077935	0.700923	0.845669	0.471261	NA	-0.229662	1	SMC1B
ENSG00000077942	-0.0121192	0.992856	-0.230166	0.862992	-0.218046	1	FBLN1
ENSG00000077943	-0.417618	0.672755	-0.542324	0.731576	-0.124706	1	ITGA8
ENSG00000077984	0.564683	NA	-1.08875	NA	-1.65344	1	CST7
ENSG00000078018	0.494328	0.421432	0.112005	0.944344	-0.382323	1	MAP2
ENSG00000078043	-0.020209	0.972088	0.00143317	0.998176	0.0216422	1	PIAS2
ENSG00000078053	-0.157388	0.838624	-0.168891	0.883143	-0.011503	1	AMPH
ENSG00000078061	0.00490913	0.995353	0.236805	0.754204	0.231896	1	ARAF
ENSG00000078070	-0.0323294	0.967508	0.0592833	0.961781	0.0916128	1	MCCC1
ENSG00000078081	-0.883675	0.651553	-0.388287	NA	0.495388	1	LAMP3
ENSG00000078098	-1.45161	0.292912	-0.0271698	0.994896	1.42444	1	FAP
ENSG00000078114	0.485574	0.486812	0.351423	0.794713	-0.134151	1	NEBL
ENSG00000078124	0.16992	0.724849	0.0729351	0.938814	-0.0969847	1	ACER3
ENSG00000078140	-0.0824301	0.873592	-0.126297	0.860357	-0.0438667	1	UBE2K
ENSG00000078142	0.0301182	0.965038	-0.0355164	0.973018	-0.0656346	1	PIK3C3
ENSG00000078177	-0.301521	0.513571	-0.470033	0.413174	-0.168512	1	N4BP2
ENSG00000078237	-0.0422965	0.956268	-0.0661935	0.949842	-0.023897	1	TIGAR
ENSG00000078246	-0.19146	0.685723	-0.0775057	0.935263	0.113954	1	TULP3
ENSG00000078269	-0.539149	0.582906	-0.665212	0.685063	-0.126063	1	SYNJ2
ENSG00000078295	0.787703	0.247934	0.538768	0.703036	-0.248935	1	ADCY2
ENSG00000078304	-0.00490796	0.994845	0.0607125	0.949842	0.0656204	1	PPP2R5C
ENSG00000078319	-0.0657769	0.933372	0.0621196	0.961295	0.127896	1	NA
ENSG00000078328	0.314733	0.792779	-0.0112968	0.996419	-0.32603	1	RBFOX1
ENSG00000078369	0.0537492	0.9142	0.0428507	0.961243	-0.0108985	1	GNB1
ENSG00000078399	-1.42236	NA	0	NA	0.751217	1	HOXA9
ENSG00000078401	-0.593044	0.493958	-0.12256	0.9607	0.470483	1	EDN1
ENSG00000078403	-0.0705799	0.904806	-0.105653	0.897568	-0.0350729	1	MLLT10
ENSG00000078487	0.0382599	0.979812	0.20615	0.907209	0.16789	1	ZCWPW1
ENSG00000078549	0.212555	0.746972	0.0785501	0.956527	-0.134005	1	ADCYAP1R1
ENSG00000078579	-0.182003	NA	3.03219	NA	3.2142	1	FGF20
ENSG00000078589	3.01086	NA	2.80037	NA	0	1	P2RY10
ENSG00000078596	-0.406836	0.72139	-0.554523	0.749551	-0.147687	1	ITM2A
ENSG00000078618	-0.0787227	0.888235	-0.0559963	0.954821	0.0227264	1	NRDC
ENSG00000078668	0.0471057	0.931513	0.0273438	0.973772	-0.0197618	1	VDAC3
ENSG00000078674	-0.117019	0.867387	-0.269816	0.749551	-0.152798	1	PCM1
ENSG00000078687	0.145253	0.870553	-0.297594	0.792437	-0.442847	1	TNRC6C
ENSG00000078699	0.225808	0.736473	0.0528841	0.97076	-0.172924	1	CBFA2T2
ENSG00000078725	0.406926	0.662284	0.203559	0.911493	-0.203367	1	BRINP1
ENSG00000078747	-0.190103	0.771387	-0.207159	0.837801	-0.0170555	1	ITCH
ENSG00000078795	-0.500469	NA	-1.37839	NA	-0.877918	1	PKD2L2
ENSG00000078804	0.198403	0.508022	0.16133	0.776286	-0.0370722	1	TP53INP2
ENSG00000078808	0.297484	0.372986	0.15451	0.828042	-0.142974	1	SDF4
ENSG00000078814	-0.499815	0.786282	-0.495706	NA	0.00410835	1	MYH7B
ENSG00000078898	-1.42236	NA	0	NA	0.751217	1	BPIFB2
ENSG00000078900	0.266542	0.925704	0.100369	NA	-0.166172	1	TP73
ENSG00000078902	0.109649	0.878704	0.120653	0.907881	0.0110037	1	TOLLIP
ENSG00000078967	0.120165	0.79523	0.241108	0.693113	0.120943	1	UBE2D4
ENSG00000079101	-0.767831	0.427585	-0.292558	NA	0.475273	1	CLUL1
ENSG00000079102	0.612788	0.47958	0.342436	0.846975	-0.270352	1	RUNX1T1
ENSG00000079112	-0.871709	0.818699	-0.0563301	NA	0.815379	1	CDH17
ENSG00000079134	-0.351555	0.466538	-0.152762	0.887493	0.198793	1	THOC1
ENSG00000079150	-0.448858	0.540957	-0.217809	0.889672	0.231049	1	FKBP7
ENSG00000079156	0.0714521	0.920768	0.0786963	0.941411	0.00724417	1	OSBPL6
ENSG00000079215	0.451455	0.252681	0.0564811	0.966806	-0.394974	1	SLC1A3
ENSG00000079246	-0.11032	0.870683	0.0338161	0.97725	0.144136	1	XRCC5
ENSG00000079257	-0.545423	0.811059	0.277185	NA	0.822608	1	LXN
ENSG00000079263	-0.483575	0.895868	-1.5698	NA	-1.08623	1	SP140
ENSG00000079277	-0.0198258	0.981944	0.332774	0.679415	0.352599	1	MKNK1
ENSG00000079308	-0.652642	0.398758	-0.527838	0.725294	0.124804	1	TNS1
ENSG00000079313	-0.273818	0.664563	-0.0992304	0.942512	0.174587	1	REXO1
ENSG00000079332	0.0627806	0.875202	0.0225854	0.974107	-0.0401952	1	SAR1A
ENSG00000079335	-0.0807342	0.934053	0.187787	0.878633	0.268521	1	CDC14A
ENSG00000079337	-0.821031	0.510762	-0.367795	0.892565	0.453236	1	RAPGEF3
ENSG00000079385	-7.56599	0.0171481	-3.6753	NA	3.89069	0.911389	CEACAM1
ENSG00000079387	-0.161146	0.818778	-0.0671867	0.963351	0.0939592	1	SENP1
ENSG00000079393	-1.82137	0.593758	-0.224317	NA	1.59705	1	DUSP13
ENSG00000079432	0.165049	0.826518	-0.0240223	0.988642	-0.189071	1	CIC
ENSG00000079435	0.140682	0.877173	-0.18509	0.885925	-0.325772	1	LIPE
ENSG00000079459	-0.201836	0.819311	-0.122899	0.935263	0.0789373	1	FDFT1
ENSG00000079462	0.228501	0.497649	0.349483	0.413174	0.120983	1	PAFAH1B3
ENSG00000079482	0.147292	0.863586	-0.107587	0.935263	-0.254878	1	OPHN1
ENSG00000079557	-3.14408	NA	0	NA	2.47294	1	AFM
ENSG00000079616	0.000821252	0.999208	0.0553256	0.964615	0.0545044	1	KIF22
ENSG00000079689	0.281246	0.931623	0.682118	NA	0.400872	1	SCGN
ENSG00000079691	0.160739	0.863586	0.16696	0.901947	0.00622159	1	CARMIL1
ENSG00000079739	-0.361921	0.626662	-0.0652273	0.971633	0.296694	1	PGM1
ENSG00000079785	0.00672279	0.991629	-0.113642	0.84418	-0.120365	1	DDX1
ENSG00000079805	0.158194	0.730681	0.0208367	0.985893	-0.137357	1	DNM2
ENSG00000079819	-0.452359	0.600208	-0.405649	0.793719	0.0467106	1	EPB41L2
ENSG00000079841	0.261337	0.82848	0.090521	0.970583	-0.170816	1	RIMS1
ENSG00000079931	-0.351934	0.558453	-0.359782	0.736263	-0.00784831	1	MOXD1
ENSG00000079950	0.170403	0.719573	-0.0358923	0.973233	-0.206295	1	STX7
ENSG00000079974	0.042616	0.939523	0.101892	0.882244	0.0592761	1	RABL2B
ENSG00000079999	0.0340133	0.963208	-0.0321096	0.976529	-0.0661229	1	KEAP1
ENSG00000080007	-4.36507	NA	-1.63293	NA	2.73214	1	DDX43
ENSG00000080031	-3.68074	NA	0.0762961	NA	3.75704	NA	PTPRH
ENSG00000080166	1.31292	0.631746	1.28473	NA	-0.0281874	1	DCT
ENSG00000080189	0.085517	0.872792	0.210944	0.744699	0.125427	1	SLC35C2
ENSG00000080200	-0.345333	0.462866	-0.636153	0.139516	-0.29082	1	CRYBG3
ENSG00000080224	-0.620226	0.715206	-0.495282	NA	0.124943	1	EPHA6
ENSG00000080293	-2.91049	NA	-2.36562	NA	0.544869	1	SCTR
ENSG00000080298	0.437595	0.553051	0.0952894	0.963351	-0.342305	1	RFX3
ENSG00000080345	-0.36863	0.478471	-0.514442	0.474154	-0.145812	1	RIF1
ENSG00000080371	0.0565523	0.917716	-0.0374407	0.970399	-0.0939931	1	RAB21
ENSG00000080493	-0.302207	0.782482	0.0483496	0.985168	0.350556	1	SLC4A4
ENSG00000080503	-0.15347	0.736473	-0.304814	0.588715	-0.151344	1	SMARCA2
ENSG00000080511	0	NA	-2.39162	NA	-1.931	1	RDH8
ENSG00000080546	0.195281	0.636575	0.00398355	0.996602	-0.191298	1	SESN1
ENSG00000080561	-0.740363	0.319802	-0.300774	0.866008	0.439589	1	MID2
ENSG00000080572	1.76706	NA	-0.184333	NA	-1.95139	1	DNAAF6
ENSG00000080573	0.298665	0.809121	0.448382	0.793719	0.149717	1	COL5A3
ENSG00000080603	-0.0365296	0.971975	-0.465225	0.591497	-0.428695	1	SRCAP
ENSG00000080608	-0.316586	0.624183	-0.240066	0.8403	0.0765192	1	PUM3
ENSG00000080618	1.06991	NA	-0.642085	NA	-1.712	1	CPB2
ENSG00000080644	0.586969	0.767504	0.44162	NA	-0.145349	1	CHRNA3
ENSG00000080709	-0.15366	0.96944	-0.44631	NA	-0.29265	1	KCNN2
ENSG00000080802	-0.0362676	0.961298	-0.148682	0.863399	-0.112415	1	CNOT4
ENSG00000080815	0.0671399	0.893713	0.10717	0.880632	0.04003	1	PSEN1
ENSG00000080819	-0.0223473	0.978411	-0.134329	0.883994	-0.111982	1	CPOX
ENSG00000080822	0.16355	0.692867	0.139358	0.84418	-0.0241913	1	CLDND1
ENSG00000080823	-0.131978	0.910188	0.422224	0.757759	0.554203	1	MOK
ENSG00000080824	-0.0541885	0.914428	-0.0842146	0.903542	-0.0300262	1	HSP90AA1
ENSG00000080839	-0.145151	0.826518	-0.194904	0.830955	-0.049753	1	RBL1
ENSG00000080845	-0.113234	0.879021	0.00370905	0.997832	0.116944	1	DLGAP4
ENSG00000080854	0.254133	0.866921	0.156628	0.951848	-0.097505	1	IGSF9B
ENSG00000080910	NA	NA	NA	NA	NA	NA	CFHR2
ENSG00000080947	-0.392863	0.810186	0.0325511	0.990685	0.425414	1	CROCCP3
ENSG00000080986	-0.0938242	0.904908	-0.13026	0.907096	-0.036436	1	NDC80
ENSG00000081014	-0.44243	0.401345	-0.391259	0.690263	0.0511706	1	AP4E1
ENSG00000081019	0.155626	0.772413	-0.0160179	0.989315	-0.171644	1	RSBN1
ENSG00000081026	-0.202042	0.694771	-0.253954	0.753008	-0.0519116	1	MAGI3
ENSG00000081041	-6.80007	NA	-0.366266	NA	6.4338	NA	CXCL2
ENSG00000081051	-0.545611	0.76806	0.0981742	NA	0.643786	1	AFP
ENSG00000081052	0.087206	0.925197	-0.201909	0.864708	-0.289115	1	COL4A4
ENSG00000081059	-0.277408	0.763571	0.00173511	0.998815	0.279144	1	TCF7
ENSG00000081087	-0.143897	0.808011	-0.247227	0.754066	-0.10333	1	OSTM1
ENSG00000081138	0.28146	0.694421	-0.0548331	0.973233	-0.336293	1	CDH7
ENSG00000081148	0.0310713	0.988004	-0.0931716	NA	-0.124243	1	IMPG2
ENSG00000081154	-0.0449946	0.9139	-0.070024	0.903163	-0.0250294	1	PCNP
ENSG00000081177	0.142356	0.788686	0.0519672	0.963941	-0.0903892	1	EXD2
ENSG00000081181	0.237161	0.776476	-0.300047	0.806102	-0.537208	1	ARG2
ENSG00000081189	-0.31241	0.633865	-0.0551262	0.973233	0.257283	1	MEF2C
ENSG00000081237	-0.0456419	0.992331	-0.270296	NA	-0.224654	1	PTPRC
ENSG00000081248	0.501171	NA	0.290647	NA	0	1	CACNA1S
ENSG00000081277	-5.98921	0.0860454	-1.62376	NA	4.36545	0.921017	PKP1
ENSG00000081307	-0.0372096	0.954115	-0.0888122	0.907096	-0.0516026	1	UBA5
ENSG00000081320	-0.740341	0.270708	-0.389357	0.793719	0.350984	1	STK17B
ENSG00000081377	-0.310947	0.576769	-0.364065	0.693113	-0.0531184	1	CDC14B
ENSG00000081386	0.191119	0.78274	0.0370511	0.980654	-0.154068	1	ZNF510
ENSG00000081479	0.555959	0.611047	0.336493	0.876839	-0.219466	1	LRP2
ENSG00000081665	-0.356978	0.399625	-0.133045	0.892565	0.223934	1	ZNF506
ENSG00000081692	0.181471	0.811284	-0.0491725	0.973233	-0.230643	1	JMJD4
ENSG00000081721	0.0390465	0.959436	0.0849411	0.929681	0.0458946	1	DUSP12
ENSG00000081760	-0.346905	0.456602	-0.0457724	0.97256	0.301133	1	AACS
ENSG00000081791	0.113093	0.776917	0.268438	0.54798	0.155344	1	DELE1
ENSG00000081800	NA	NA	NA	NA	NA	NA	SLC13A1
ENSG00000081803	0.17963	0.663794	-0.16552	0.812656	-0.34515	1	CADPS2
ENSG00000081818	0.474338	0.678962	-0.023747	0.991923	-0.498085	1	PCDHB4
ENSG00000081842	-0.273337	0.869938	-0.104723	NA	0.168615	1	PCDHA6
ENSG00000081853	0.0300385	0.99035	-0.134312	NA	-0.16435	1	PCDHGA2
ENSG00000081870	0.207232	0.674227	0.292722	0.703036	0.0854893	1	HSPB11
ENSG00000081913	0.236241	0.613671	-0.0486379	0.970399	-0.284879	1	PHLPP1
ENSG00000081923	-3.09027	0.00192768	-1.27823	0.620801	1.81203	0.791175	ATP8B1
ENSG00000081985	-0.695408	0.870302	-0.811249	NA	-0.115841	1	IL12RB2
ENSG00000082014	0.435431	0.231895	0.47371	0.348613	0.0382785	1	SMARCD3
ENSG00000082068	0.0265973	0.968217	0.0435266	0.96956	0.0169293	1	WDR70
ENSG00000082074	-5.04048	NA	-0.821405	NA	4.21908	NA	FYB1
ENSG00000082126	-0.635559	0.577673	-0.379083	0.868262	0.256477	1	MPP4
ENSG00000082146	0.264805	0.588316	0.189151	0.836229	-0.0756536	1	STRADB
ENSG00000082153	-0.147512	0.766291	-0.000913266	0.998815	0.146599	1	BZW1
ENSG00000082175	-1.13273	0.849509	-1.05906	NA	0.0736672	1	PGR
ENSG00000082196	0.438601	0.694302	0.349181	0.862622	-0.0894199	1	C1QTNF3
ENSG00000082212	0.0234463	0.965422	0.051274	0.946135	0.0278277	1	ME2
ENSG00000082213	-0.111729	0.840893	0.0122239	0.990239	0.123953	1	C5orf22
ENSG00000082258	-0.107235	0.799178	-0.0919453	0.892565	0.0152901	1	CCNT2
ENSG00000082269	0.230337	0.716007	0.0233803	0.988642	-0.206957	1	FAM135A
ENSG00000082293	0.38052	0.927751	0.987613	NA	0.607092	1	COL19A1
ENSG00000082397	-0.00305793	0.998079	-0.209359	0.823737	-0.206301	1	EPB41L3
ENSG00000082438	-0.236845	0.731786	0.176556	0.885925	0.413401	1	COBLL1
ENSG00000082458	-0.31384	0.498483	-0.137726	0.892565	0.176114	1	DLG3
ENSG00000082482	-0.336009	0.647015	-0.168502	0.908336	0.167507	1	KCNK2
ENSG00000082497	0.400471	0.403589	0.176896	0.870857	-0.223575	1	SERTAD4
ENSG00000082512	-0.426478	0.311037	-0.293262	0.736806	0.133216	1	TRAF5
ENSG00000082515	0.0984758	0.876315	0.129366	0.885925	0.03089	1	MRPL22
ENSG00000082516	-0.191171	0.669437	-0.052133	0.963764	0.139038	1	GEMIN5
ENSG00000082556	0.870679	0.756986	-0.494105	NA	-1.36478	1	OPRK1
ENSG00000082641	-0.126597	0.872792	-0.281477	0.774207	-0.15488	1	NFE2L1
ENSG00000082684	1.11408	0.438631	0.56702	0.853524	-0.547064	1	SEMA5B
ENSG00000082701	-0.0522465	0.953944	-0.29722	0.736263	-0.244973	1	GSK3B
ENSG00000082781	-0.366024	0.573666	-0.317294	0.791791	0.0487302	1	ITGB5
ENSG00000082805	-0.139768	0.835094	-0.421417	0.520535	-0.281649	1	ERC1
ENSG00000082898	-0.121596	0.865662	-0.142036	0.889672	-0.0204404	1	XPO1
ENSG00000082929	1.93101	NA	1.72053	NA	0	1	LINC01587
ENSG00000082996	0.313015	0.576048	0.08696	0.948309	-0.226055	1	RNF13
ENSG00000083067	-0.197833	0.840893	-0.352883	0.787804	-0.15505	1	TRPM3
ENSG00000083093	-0.0738649	0.936142	0.0454719	0.973772	0.119337	1	PALB2
ENSG00000083097	-0.115964	0.835948	-0.425776	0.348613	-0.309812	1	DOP1A
ENSG00000083099	0.106792	0.844338	-0.0798885	0.926994	-0.186681	1	LYRM2
ENSG00000083123	0.241936	0.582095	0.106311	0.907562	-0.135625	1	BCKDHB
ENSG00000083168	-0.110531	0.886954	-0.367466	0.682519	-0.256935	1	KAT6A
ENSG00000083223	-0.355473	0.432956	-0.314969	0.714336	0.0405038	1	TUT7
ENSG00000083290	0.160126	0.763419	0.0969325	0.919888	-0.0631935	1	ULK2
ENSG00000083307	-6.50403	NA	-0.0589968	NA	6.44503	NA	GRHL2
ENSG00000083312	-0.0544346	0.944091	-0.183762	0.829504	-0.129328	1	TNPO1
ENSG00000083444	-0.102954	0.88511	-0.0706542	0.956053	0.0322995	1	PLOD1
ENSG00000083454	-2.58877	0.613229	0.242743	NA	2.83151	1	P2RX5
ENSG00000083457	0.0660792	0.948651	-0.0787127	0.9607	-0.144792	1	ITGAE
ENSG00000083520	-0.119497	0.835105	-0.126108	0.883994	-0.00661107	1	DIS3
ENSG00000083535	-0.20869	0.633298	-0.364037	0.516576	-0.155348	1	PIBF1
ENSG00000083544	0.0134664	0.982518	0.110158	0.874538	0.096692	1	TDRD3
ENSG00000083622	NA	NA	NA	NA	NA	NA	NA
ENSG00000083635	-0.0760744	0.928351	0.0353045	0.980671	0.111379	1	NUFIP1
ENSG00000083642	-0.0420509	0.965938	-0.279375	0.791727	-0.237324	1	PDS5B
ENSG00000083720	0.0281058	0.968301	0.0134383	0.990007	-0.0146675	1	OXCT1
ENSG00000083750	0.14461	0.800438	0.11351	0.903542	-0.0310997	1	RRAGB
ENSG00000083782	NA	NA	NA	NA	NA	NA	EPYC
ENSG00000083799	-0.266666	0.466788	-0.270704	0.685063	-0.0040383	1	CYLD
ENSG00000083807	0.210772	0.862043	0.0356047	0.988642	-0.175167	1	SLC27A5
ENSG00000083812	-0.0458554	0.949005	-0.111866	0.895196	-0.0660108	1	ZNF324
ENSG00000083814	0.271886	0.616537	0.130086	0.907096	-0.141801	1	ZNF671
ENSG00000083817	0.358055	0.335539	0.386606	0.516576	0.0285518	1	ZNF416
ENSG00000083828	-0.140536	0.851887	0.0297512	0.984505	0.170287	1	ZNF586
ENSG00000083838	0.385256	0.414392	0.2709	0.775738	-0.114356	1	ZNF446
ENSG00000083844	0.228596	0.614848	0.0487185	0.970261	-0.179877	1	ZNF264
ENSG00000083845	0.132019	0.769099	0.408922	0.26234	0.276903	1	RPS5
ENSG00000083857	-0.305226	0.633865	-0.471356	0.612189	-0.166131	1	FAT1
ENSG00000083896	-0.00285185	0.996812	-0.0910577	0.895196	-0.0882058	1	YTHDC1
ENSG00000083937	0.0190337	0.975227	-0.0180816	0.98603	-0.0371152	1	CHMP2B
ENSG00000084070	-0.184276	0.663848	0.0517008	0.961359	0.235977	1	SMAP2
ENSG00000084072	0.0116692	0.985041	0.21333	0.714336	0.201661	1	PPIE
ENSG00000084073	0.163367	0.717858	0.0827874	0.925359	-0.0805794	1	ZMPSTE24
ENSG00000084090	0.10078	0.809121	0.0348944	0.970261	-0.0658853	1	STARD7
ENSG00000084092	-0.117661	0.811059	0.0851309	0.917472	0.202792	1	NOA1
ENSG00000084093	-0.209313	0.685607	-0.379542	0.574066	-0.170229	1	REST
ENSG00000084110	-2.103	0.565694	-1.73301	NA	0.369988	1	HAL
ENSG00000084112	-0.342152	0.517911	-0.42845	0.607268	-0.0862977	1	SSH1
ENSG00000084207	0.0526863	0.913711	0.40789	0.111613	0.355204	0.791175	GSTP1
ENSG00000084234	-0.0142062	0.982518	-0.195207	0.751456	-0.181	1	APLP2
ENSG00000084444	0.12195	0.840501	-0.0587127	0.9607	-0.180663	1	FAM234B
ENSG00000084453	1.35892	NA	-2.42304	NA	-3.78196	1	SLCO1A2
ENSG00000084463	-0.00903051	0.991051	0.0133103	0.989315	0.0223408	1	WBP11
ENSG00000084623	0.0357509	0.953401	0.257243	0.622173	0.221492	1	EIF3I
ENSG00000084628	0.448523	0.149184	0.437328	0.333824	-0.0111943	1	NKAIN1
ENSG00000084636	-0.814668	0.580869	-0.370129	NA	0.444539	1	COL16A1
ENSG00000084652	-0.0280107	0.970055	-0.232605	0.76459	-0.204594	1	TXLNA
ENSG00000084674	-3.99071	NA	-1.63294	NA	2.35778	1	APOB
ENSG00000084676	-0.051361	0.947156	-0.174815	0.837801	-0.123454	1	NCOA1
ENSG00000084693	0.25493	0.438631	0.271047	0.622635	0.0161174	1	AGBL5
ENSG00000084710	-0.115741	0.863586	-0.216451	0.797464	-0.10071	1	EFR3B
ENSG00000084731	0.0402309	0.946606	-0.184374	0.768048	-0.224605	1	KIF3C
ENSG00000084733	-0.0385039	0.949005	0.0159003	0.988096	0.0544042	1	RAB10
ENSG00000084734	-0.750301	0.873225	0.447307	NA	1.19761	1	GCKR
ENSG00000084754	0.0387023	0.942672	0.0500782	0.948309	0.0113759	1	HADHA
ENSG00000084764	0.283706	0.438631	0.0789656	0.929646	-0.204741	1	MAPRE3
ENSG00000084774	0.0304895	0.962766	0.0278936	0.976529	-0.00259591	1	CAD
ENSG00000085063	-0.217616	0.717122	-0.186718	0.857572	0.0308986	1	CD59
ENSG00000085117	-0.718651	0.580318	-0.542973	0.822323	0.175677	1	CD82
ENSG00000085185	0.157194	0.830275	0.0237076	0.988642	-0.133486	1	BCORL1
ENSG00000085224	0.0180022	0.984247	-0.401131	0.581545	-0.419133	1	ATRX
ENSG00000085231	-0.0542656	0.927379	-0.0594101	0.947303	-0.00514454	1	AK6
ENSG00000085265	0.501171	NA	0.290647	NA	0	1	FCN1
ENSG00000085274	-0.179615	0.694421	-0.312179	0.620918	-0.132564	1	MYNN
ENSG00000085276	-1.44732	0.0261137	-0.817302	0.545238	0.630017	1	MECOM
ENSG00000085365	-0.0765505	0.915284	-0.167626	0.85769	-0.0910757	1	SCAMP1
ENSG00000085377	-0.0145679	0.982405	-0.032234	0.971734	-0.0176661	1	PREP
ENSG00000085382	0.0728815	0.903631	0.0575193	0.956527	-0.0153622	1	HACE1
ENSG00000085415	-0.152042	0.768505	0.020448	0.987692	0.17249	1	SEH1L
ENSG00000085433	0.0303321	0.960218	-0.114148	0.870581	-0.14448	1	WDR47
ENSG00000085449	-0.114525	0.863851	-0.187767	0.82668	-0.0732426	1	WDFY1
ENSG00000085465	-0.975754	0.583761	0.394993	NA	1.37075	1	OVGP1
ENSG00000085491	-0.468538	0.449188	-0.346215	0.776116	0.122323	1	SLC25A24
ENSG00000085511	-0.316959	0.479196	-0.398135	0.54798	-0.0811764	1	MAP3K4
ENSG00000085514	0.108904	0.983911	-0.570615	NA	-0.679519	1	PILRA
ENSG00000085552	0.438537	0.458508	0.264979	0.824044	-0.173558	1	IGSF9
ENSG00000085563	-0.268265	0.954159	1.05382	NA	1.32208	1	ABCB1
ENSG00000085644	0.159412	0.723399	0.251302	0.703036	0.09189	1	ZNF213
ENSG00000085662	-0.0299134	0.965587	-0.0113979	0.990473	0.0185155	1	AKR1B1
ENSG00000085719	-0.170993	0.763095	0.00502071	0.996602	0.176013	1	CPNE3
ENSG00000085721	-0.176316	0.654485	-0.181644	0.791368	-0.00532823	1	RRN3
ENSG00000085733	-0.402716	0.40109	-0.235665	0.812405	0.16705	1	CTTN
ENSG00000085741	0.20655	0.904693	-0.252434	0.919988	-0.458984	1	WNT11
ENSG00000085760	-0.273044	0.549034	-0.0457476	0.970583	0.227297	1	MTIF2
ENSG00000085788	0.0875275	0.853369	0.00386432	0.996419	-0.0836631	1	DDHD2
ENSG00000085831	-1.72321	0.427514	0.226182	NA	1.94939	1	TTC39A
ENSG00000085832	-0.0245037	0.977142	0.00702546	0.995263	0.0315292	1	EPS15
ENSG00000085840	-0.117079	0.913048	-0.0331916	0.987853	0.0838871	1	ORC1
ENSG00000085871	0.0158	0.992331	0.453134	0.740552	0.437334	1	MGST2
ENSG00000085872	-0.0859162	0.91765	-0.105526	0.929681	-0.01961	1	CHERP
ENSG00000085978	-0.257852	0.537279	-0.231631	0.76459	0.026221	1	ATG16L1
ENSG00000085982	-0.165009	0.697569	-0.15149	0.830955	0.0135197	1	USP40
ENSG00000085998	0.130293	0.694997	0.175577	0.736263	0.0452841	1	POMGNT1
ENSG00000085999	-0.118371	0.867997	-0.0689566	0.959193	0.0494149	1	RAD54L
ENSG00000086015	-0.0450893	0.936955	-0.0155001	0.988449	0.0295892	1	MAST2
ENSG00000086061	-0.0557413	0.897762	-0.0616369	0.926806	-0.00589559	1	DNAJA1
ENSG00000086062	-0.475083	0.267192	-0.242344	0.798691	0.232739	1	B4GALT1
ENSG00000086065	-0.11883	0.78274	0.0291622	0.973233	0.147993	1	CHMP5
ENSG00000086102	-0.0878079	0.852546	-0.00865207	0.990685	0.0791558	1	NFX1
ENSG00000086159	-0.430442	0.935226	-1.15031	NA	-0.719872	1	AQP6
ENSG00000086189	-0.0541522	0.940735	0.0372269	0.973233	0.0913791	1	DIMT1
ENSG00000086200	-0.162939	0.80757	-0.111354	0.920896	0.0515853	1	IPO11
ENSG00000086205	0.298417	0.904625	-0.286894	NA	-0.58531	1	FOLH1
ENSG00000086232	0.134824	0.637007	0.0959999	0.860409	-0.0388237	1	EIF2AK1
ENSG00000086288	NA	NA	NA	NA	NA	NA	NME8
ENSG00000086289	0.397204	0.371474	0.379421	0.628999	-0.0177832	1	EPDR1
ENSG00000086300	0.124511	0.908957	0.330796	0.804566	0.206285	1	SNX10
ENSG00000086475	0.0866044	0.853461	-0.0660396	0.927556	-0.152644	1	SEPHS1
ENSG00000086504	-0.0154597	0.983911	0.167988	0.824281	0.183448	1	MRPL28
ENSG00000086506	1.82868	0.590318	0.798683	NA	-1.03	1	HBQ1
ENSG00000086544	-0.5488	0.497659	-0.017299	0.994413	0.531501	1	ITPKC
ENSG00000086548	-10.5434	NA	-1.52564	NA	9.01773	NA	CEACAM6
ENSG00000086570	-0.1292	0.961582	0.14154	NA	0.270739	1	FAT2
ENSG00000086589	-0.00213207	0.998079	0.0422522	0.964615	0.0443843	1	RBM22
ENSG00000086598	-0.0253966	0.969185	-0.0666102	0.939309	-0.0412136	1	TMED2
ENSG00000086619	-0.248112	0.73575	-0.205035	0.872906	0.0430766	1	ERO1B
ENSG00000086666	0.216475	0.462279	0.0684057	0.923482	-0.148069	1	ZFAND6
ENSG00000086696	0.208168	0.914827	0.141548	0.970211	-0.0666202	1	HSD17B2
ENSG00000086712	-0.266399	0.524251	-0.336066	0.614213	-0.0696666	1	TXLNG
ENSG00000086717	0.868033	0.344328	0.574954	0.760086	-0.293079	1	PPEF1
ENSG00000086730	-1.18571	0.427149	0.296178	NA	1.48188	1	LAT2
ENSG00000086758	-0.318933	0.363101	-0.413889	0.358881	-0.0949558	1	HUWE1
ENSG00000086827	-0.166975	0.793023	-0.0773282	0.94955	0.0896466	1	ZW10
ENSG00000086848	0.160226	0.843636	0.119705	0.926994	-0.0405209	1	ALG9
ENSG00000086967	-0.114755	NA	-1.38745	NA	-1.2727	1	MYBPC2
ENSG00000086991	0.0166594	0.987586	-0.0916604	0.944344	-0.10832	1	NOX4
ENSG00000087008	0.0144648	0.98315	0.117218	0.880632	0.102753	1	ACOX3
ENSG00000087053	-0.191924	0.798418	-0.128489	0.920043	0.0634349	1	MTMR2
ENSG00000087074	-0.610936	0.267192	-0.16074	0.90922	0.450195	1	PPP1R15A
ENSG00000087076	0.35702	0.590684	0.196671	0.883994	-0.160349	1	HSD17B14
ENSG00000087077	-0.0651315	0.943497	0.093898	0.940452	0.15903	1	TRIP6
ENSG00000087085	0.17635	0.872792	-0.100685	0.9607	-0.277036	1	ACHE
ENSG00000087086	-0.209655	0.731586	0.279126	0.764401	0.48878	1	FTL
ENSG00000087087	-0.192714	0.789744	-0.156053	0.893701	0.036661	1	SRRT
ENSG00000087088	0.257705	0.682922	0.0841382	0.954774	-0.173567	1	BAX
ENSG00000087095	-0.0944036	0.884238	-0.00695695	0.995263	0.0874466	1	NLK
ENSG00000087111	0.00467678	0.995405	0.112012	0.89877	0.107335	1	PIGS
ENSG00000087116	0.576357	0.408449	0.23875	0.88157	-0.337607	1	ADAMTS2
ENSG00000087128	-6.57358	NA	0.249374	NA	6.82295	NA	TMPRSS11E
ENSG00000087152	0.0694822	0.90396	0.0265598	0.97997	-0.0429224	1	ATXN7L3
ENSG00000087157	-0.0952163	0.893097	-0.0766141	0.947915	0.0186023	1	PGS1
ENSG00000087191	9.7e-05	0.999793	-0.0232475	0.984649	-0.0233446	1	PSMC5
ENSG00000087206	-0.0249009	0.962804	-0.170886	0.75327	-0.145985	1	UIMC1
ENSG00000087237	-1.42239	NA	-3.53488	NA	-2.1125	1	CETP
ENSG00000087245	0.0183002	0.991143	-0.478532	0.731576	-0.496832	1	MMP2
ENSG00000087250	0.0543002	0.983911	0.704469	0.802119	0.650169	1	MT3
ENSG00000087253	0.236245	0.709133	-0.1043	0.934857	-0.340545	1	LPCAT2
ENSG00000087258	0.685676	0.335675	0.297467	0.85741	-0.388209	1	GNAO1
ENSG00000087263	-0.117374	0.803994	-0.0766785	0.925359	0.0406958	1	OGFOD1
ENSG00000087266	0.147243	0.691307	0.16286	0.792304	0.0156162	1	SH3BP2
ENSG00000087269	-0.284343	0.604768	-0.178319	0.870144	0.106023	1	NOP14
ENSG00000087274	-0.0163189	0.979081	-0.00500101	0.995263	0.0113179	1	ADD1
ENSG00000087299	0.032408	0.96098	0.0832204	0.921155	0.0508125	1	L2HGDH
ENSG00000087301	0.0594094	0.959855	0.0167058	0.99092	-0.0427036	1	TXNDC16
ENSG00000087302	-0.0999387	0.875202	0.0933766	0.925359	0.193315	1	RTRAF
ENSG00000087303	-0.57438	0.520326	-0.446492	0.793719	0.127888	1	NID2
ENSG00000087338	0.10868	0.841974	-0.0923973	0.911309	-0.201077	1	GMCL1
ENSG00000087365	-0.00644258	0.992856	0.0268517	0.976529	0.0332943	1	SF3B2
ENSG00000087448	0.014785	0.98642	-0.0353407	0.976405	-0.0501257	1	KLHL42
ENSG00000087460	0.181794	0.600208	0.0899475	0.899398	-0.0918467	1	GNAS
ENSG00000087470	-0.067812	0.892582	-0.115963	0.866008	-0.0481505	1	DNM1L
ENSG00000087494	-1.28156	0.267192	-0.397656	NA	0.883904	1	PTHLH
ENSG00000087495	0.813174	0.108299	0.0973229	0.952507	-0.715851	0.905442	PHACTR3
ENSG00000087502	-0.339253	0.374844	-0.374493	0.521721	-0.0352394	1	ERGIC2
ENSG00000087510	-1.37781	0.209099	-1.10036	0.588715	0.277454	1	TFAP2C
ENSG00000087586	-0.254841	0.648684	-0.284533	0.759553	-0.0296922	1	AURKA
ENSG00000087589	-0.689241	0.879195	-1.32584	NA	-0.636603	1	CASS4
ENSG00000087842	-0.0785949	0.931634	-0.0346451	0.982392	0.0439497	1	PIR
ENSG00000087884	0.168108	0.798536	0.19477	0.841975	0.0266619	1	AAMDC
ENSG00000087903	0.102005	0.892582	0.148666	0.889672	0.046661	1	RFX2
ENSG00000087995	0.0703263	0.9044	-0.0847707	0.920896	-0.155097	1	METTL2A
ENSG00000088002	-2.06066	0.383016	1.22156	NA	3.28221	0.815241	SULT2B1
ENSG00000088035	-0.0128593	0.989018	0.208701	0.806943	0.22156	1	ALG6
ENSG00000088038	0.052823	0.938556	0.070256	0.940504	0.017433	1	CNOT3
ENSG00000088053	-0.433081	0.924196	1.52578	NA	1.95886	1	GP6
ENSG00000088179	0.0799796	0.907531	-0.142284	0.880632	-0.222264	1	PTPN4
ENSG00000088205	-0.16013	0.698791	-0.167096	0.806234	-0.00696631	1	DDX18
ENSG00000088247	0.00558269	0.993798	-0.0959637	0.893701	-0.101546	1	KHSRP
ENSG00000088256	0.0894334	0.89929	-0.0084108	0.994896	-0.0978442	1	GNA11
ENSG00000088280	0.228195	0.545541	0.0840592	0.921155	-0.144135	1	ASAP3
ENSG00000088298	0.173925	0.692867	0.0545341	0.959922	-0.119391	1	EDEM2
ENSG00000088305	0.095225	0.93608	-0.295425	0.822445	-0.39065	1	DNMT3B
ENSG00000088320	1.9675	NA	2.71876	NA	0.751257	1	REM1
ENSG00000088325	-0.274243	0.672315	-0.309934	0.773091	-0.0356903	1	TPX2
ENSG00000088340	-7.1169	NA	-0.870453	NA	6.24645	NA	FER1L4
ENSG00000088356	0.153401	0.841341	0.136645	0.906739	-0.0167561	1	PDRG1
ENSG00000088367	-0.0224678	0.974382	-0.126652	0.875214	-0.104185	1	EPB41L1
ENSG00000088386	-0.329074	0.839594	-0.611087	0.771229	-0.282013	1	SLC15A1
ENSG00000088387	-0.828396	0.163655	-0.66828	0.517137	0.160116	1	DOCK9
ENSG00000088448	-0.0680314	0.932703	-0.0454966	0.970583	0.0225348	1	ANKRD10
ENSG00000088451	0.0112198	0.991258	-0.200491	0.829504	-0.211711	1	TGDS
ENSG00000088538	0.258018	0.823286	0.000769861	0.998947	-0.257248	1	DOCK3
ENSG00000088543	0.212721	0.717562	0.140875	0.893701	-0.0718457	1	C3orf18
ENSG00000088682	0.00144913	0.998155	-0.0256895	0.982484	-0.0271386	1	COQ9
ENSG00000088726	-6.41469	NA	0	NA	5.74355	1	TMEM40
ENSG00000088727	0.059304	0.94905	0.309577	0.743152	0.250273	1	KIF9
ENSG00000088756	-0.225732	0.772291	-0.301078	0.793719	-0.0753462	1	ARHGAP28
ENSG00000088766	0.490094	0.17006	0.35017	0.620918	-0.139924	1	CRLS1
ENSG00000088782	NA	NA	NA	NA	NA	NA	DEFB127
ENSG00000088808	-0.805146	0.334351	-0.391387	0.829504	0.413759	1	PPP1R13B
ENSG00000088812	0.0514628	0.954159	-0.0709287	0.958268	-0.122392	1	ATRN
ENSG00000088826	-0.0602685	0.935696	0.064088	0.956053	0.124356	1	SMOX
ENSG00000088827	1.93448	NA	-0.738423	NA	-2.6729	1	SIGLEC1
ENSG00000088832	-0.230115	0.757601	-0.0593406	0.970583	0.170775	1	FKBP1A
ENSG00000088833	0.0687444	0.895712	0.00822847	0.991591	-0.060516	1	NSFL1C
ENSG00000088836	0.335251	0.74561	-0.20309	0.912355	-0.538341	1	SLC4A11
ENSG00000088854	0.114747	0.830649	-0.0849264	0.921928	-0.199673	1	DNAAF9
ENSG00000088876	-0.0336428	0.965938	-0.297098	0.699988	-0.263456	1	ZNF343
ENSG00000088881	0.789046	0.0924629	0.395077	0.722096	-0.39397	1	EBF4
ENSG00000088882	0.347396	0.731651	-0.246556	0.889672	-0.593952	1	CPXM1
ENSG00000088888	0.0493232	0.959041	-0.230884	0.812992	-0.280207	1	MAVS
ENSG00000088899	0.408789	0.383899	0.334932	0.716368	-0.0738573	1	LZTS3
ENSG00000088926	-0.460609	NA	-1.6911	NA	-1.23049	1	F11
ENSG00000088930	0.00375489	0.996932	0.0177975	0.988915	0.0140426	1	XRN2
ENSG00000088970	-0.169646	0.80757	-0.0809186	0.950927	0.0887272	1	KIZ
ENSG00000088986	-0.0110158	0.988429	0.0306042	0.975757	0.04162	1	DYNLL1
ENSG00000088992	0.39959	0.792779	1.19326	0.413174	0.793671	1	TESC
ENSG00000089006	0.0105988	0.985755	0.0356513	0.968668	0.0250525	1	SNX5
ENSG00000089009	0.00847794	0.990242	0.186526	0.746785	0.178049	1	RPL6
ENSG00000089012	0	NA	-1.63293	NA	-1.17231	1	SIRPG
ENSG00000089022	-0.134848	0.791984	0.0301009	0.976529	0.164949	1	MAPKAPK5
ENSG00000089041	-0.338671	0.872792	-0.00498741	NA	0.333684	1	P2RX7
ENSG00000089048	0.154379	0.787138	-0.117616	0.90034	-0.271995	1	ESF1
ENSG00000089050	0.246431	0.557694	0.0931377	0.920597	-0.153293	1	RBBP9
ENSG00000089053	-0.173088	0.712543	0.0748153	0.935263	0.247903	1	ANAPC5
ENSG00000089057	-0.0624208	0.943572	-0.115342	0.919988	-0.0529213	1	SLC23A2
ENSG00000089060	-0.108694	0.880212	0.217208	0.812656	0.325902	1	SLC8B1
ENSG00000089063	0.0952383	0.824941	0.155551	0.791791	0.060313	1	TMEM230
ENSG00000089091	0.0264508	0.980944	0.104614	0.940452	0.0781632	1	DZANK1
ENSG00000089094	-0.0915609	0.880721	-0.00130241	0.998176	0.0902584	1	KDM2B
ENSG00000089101	0.852558	0.426576	0.858779	0.648939	0.00622124	1	CFAP61
ENSG00000089116	0.358196	0.764966	-0.0147766	0.995263	-0.372973	1	LHX5
ENSG00000089123	-0.0140419	0.991644	0.0109559	0.994896	0.0249978	1	TASP1
ENSG00000089127	-5.73673	NA	-1.40593	NA	4.33079	NA	OAS1
ENSG00000089154	-0.0895663	0.857133	-0.115629	0.867384	-0.0260628	1	GCN1
ENSG00000089157	0.127743	0.822481	0.327244	0.609507	0.199501	1	RPLP0
ENSG00000089159	-0.612524	0.417949	-0.227485	0.895196	0.385039	1	PXN
ENSG00000089163	0.0386597	0.989018	-0.382378	NA	-0.421037	1	SIRT4
ENSG00000089169	-0.622666	0.889719	-1.01565	NA	-0.392984	1	RPH3A
ENSG00000089177	0.0170077	0.983911	-0.285608	0.709667	-0.302616	1	KIF16B
ENSG00000089195	-0.153893	0.803208	-0.145948	0.88157	0.00794548	1	TRMT6
ENSG00000089199	0.0147684	0.992856	0.146966	0.936266	0.132197	1	CHGB
ENSG00000089220	0.139645	0.594134	0.23071	0.513223	0.091065	1	PEBP1
ENSG00000089225	0	NA	0	NA	0	1	TBX5
ENSG00000089234	0.00575591	0.993153	-0.0688134	0.92704	-0.0745693	1	BRAP
ENSG00000089248	0.000327413	0.999427	0.0517108	0.957071	0.0513834	1	ERP29
ENSG00000089250	0.108733	0.956268	0.483156	0.812656	0.374424	1	NOS1
ENSG00000089280	-0.0901338	0.857712	-0.00787245	0.992402	0.0822614	1	FUS
ENSG00000089289	0.0335159	0.959417	0.0886199	0.90993	0.055104	1	IGBP1
ENSG00000089327	-1.45777	0.534509	-0.295094	0.964615	1.16267	1	FXYD5
ENSG00000089335	0.147412	0.767158	-0.0618804	0.949842	-0.209292	1	ZNF302
ENSG00000089351	0.117716	0.883659	0.191213	0.863496	0.0734971	1	GRAMD1A
ENSG00000089356	-6.08398	NA	17.0717	NA	23.1556	NA	FXYD3
ENSG00000089472	-0.0308811	0.971932	-0.256677	0.775787	-0.225796	1	HEPH
ENSG00000089486	0.0931457	0.858671	0.218837	0.731576	0.125691	1	CDIP1
ENSG00000089505	0.160925	0.923973	-0.562245	0.764695	-0.72317	1	CMTM1
ENSG00000089558	0.731086	NA	2.72338	NA	1.99229	1	KCNH4
ENSG00000089597	0.0164853	0.980379	0.0485396	0.9607	0.0320544	1	GANAB
ENSG00000089639	0.319217	0.363318	0.142425	0.85941	-0.176792	1	GMIP
ENSG00000089682	-0.59081	0.272445	-0.578498	0.516576	0.0123126	1	RBM41
ENSG00000089685	0.036636	0.963149	0.045428	0.970583	0.00879204	1	BIRC5
ENSG00000089692	-1.6433	0.397982	-0.19849	NA	1.44481	1	LAG3
ENSG00000089693	0.139383	0.809121	0.174945	0.830955	0.0355618	1	MLF2
ENSG00000089723	-0.173258	0.857629	-0.153639	0.916487	0.0196188	1	OTUB2
ENSG00000089737	0.0995212	0.816592	0.044981	0.959309	-0.0545402	1	DDX24
ENSG00000089775	-0.0576705	0.944091	-0.0514637	0.970399	0.00620679	1	ZBTB25
ENSG00000089818	-0.198819	0.646949	-0.0167136	0.988674	0.182105	1	NECAP1
ENSG00000089820	-2.10355	NA	0.567245	NA	2.67079	NA	ARHGAP4
ENSG00000089847	-0.359254	0.866921	-0.319666	NA	0.0395877	1	ANKRD24
ENSG00000089876	0.109348	0.763571	0.204123	0.685063	0.0947748	1	DHX32
ENSG00000089902	-0.20897	0.532368	-0.217508	0.718305	-0.00853862	1	RCOR1
ENSG00000089916	-0.00744171	0.992856	-0.235583	0.749348	-0.228141	1	GPATCH2L
ENSG00000090006	0.0743614	0.91401	-0.0673962	0.952038	-0.141758	1	LTBP4
ENSG00000090013	0.0993973	0.923696	0.414435	0.716478	0.315038	1	BLVRB
ENSG00000090020	0.0341417	0.971669	0.0372047	0.980654	0.00306302	1	SLC9A1
ENSG00000090054	-0.113806	0.839909	0.00453742	0.996485	0.118343	1	SPTLC1
ENSG00000090060	-0.0652674	0.913459	-0.132134	0.86634	-0.0668666	1	PAPOLA
ENSG00000090061	0.0250257	0.972387	-0.116838	0.890121	-0.141863	1	CCNK
ENSG00000090097	-0.0386198	0.964548	0.157001	0.880632	0.19562	1	PCBP4
ENSG00000090104	-1.0077	NA	-0.0835934	NA	0.924106	1	RGS1
ENSG00000090238	0.289781	0.687173	0.536292	0.560007	0.24651	1	YPEL3
ENSG00000090263	-0.0753634	0.9139	0.0448626	0.970583	0.120226	1	MRPS33
ENSG00000090266	0.131573	0.897374	0.292458	0.822418	0.160885	1	NDUFB2
ENSG00000090273	-0.129859	0.869441	-0.0528628	0.970583	0.0769961	1	NUDC
ENSG00000090316	-0.00996902	0.989018	0.028159	0.976405	0.038128	1	MAEA
ENSG00000090339	-2.71232	0.148155	-0.231495	0.970583	2.48082	0.911389	ICAM1
ENSG00000090372	0.127706	0.789135	0.181705	0.793719	0.0539988	1	STRN4
ENSG00000090376	-0.799626	0.663848	-1.14224	NA	-0.342611	1	IRAK3
ENSG00000090382	-0.422632	0.920081	-0.994529	NA	-0.571897	1	LYZ
ENSG00000090402	NA	NA	NA	NA	NA	NA	SI
ENSG00000090432	0.090484	0.803876	0.0246344	0.973233	-0.0658496	1	MUL1
ENSG00000090447	-0.0502511	0.956826	0.0444986	0.973233	0.0947497	1	TFAP4
ENSG00000090470	0.148588	0.768505	0.149853	0.85097	0.00126503	1	PDCD7
ENSG00000090487	0.25803	0.315169	0.230273	0.620918	-0.0277573	1	SPG21
ENSG00000090512	4.08269	NA	3.87218	NA	0	1	FETUB
ENSG00000090520	0.0694943	0.860528	-0.136137	0.789468	-0.205632	1	DNAJB11
ENSG00000090530	-0.715644	0.510762	-0.186571	0.945982	0.529073	1	P3H2
ENSG00000090534	0.483525	0.895712	0.604587	NA	0.121062	1	THPO
ENSG00000090539	-0.182708	0.891936	-0.0258861	0.990473	0.156822	1	CHRD
ENSG00000090554	-2.22796	NA	1.77203	NA	3.99999	1	FLT3LG
ENSG00000090565	0.136985	0.851896	-0.0218227	0.988642	-0.158808	1	RAB11FIP3
ENSG00000090581	0.00785287	0.994999	0.144882	0.920597	0.137029	1	GNPTG
ENSG00000090612	-0.182402	0.759753	-0.229429	0.797464	-0.0470273	1	ZNF268
ENSG00000090615	-0.369555	0.645495	-0.462721	0.725294	-0.0931657	1	GOLGA3
ENSG00000090621	-0.221836	0.642847	0.0383344	0.973233	0.26017	1	PABPC4
ENSG00000090659	-2.23838	NA	0	NA	1.56724	1	CD209
ENSG00000090661	0.50451	0.312783	0.288382	0.791727	-0.216128	1	CERS4
ENSG00000090674	0.206121	0.666593	0.0819189	0.935263	-0.124202	1	MCOLN1
ENSG00000090686	0.0507043	0.937637	-0.139958	0.851245	-0.190662	1	USP48
ENSG00000090776	0.0772814	0.915691	-0.101204	0.923968	-0.178486	1	EFNB1
ENSG00000090857	-0.140453	0.760378	-0.146516	0.8403	-0.00606317	1	PDPR
ENSG00000090861	-0.155993	0.75485	-0.106714	0.901947	0.0492793	1	AARS1
ENSG00000090863	0.0376818	0.959041	-0.229012	0.749113	-0.266694	1	GLG1
ENSG00000090889	-0.299029	0.608915	-0.432542	0.620918	-0.133512	1	KIF4A
ENSG00000090905	-0.357805	0.41424	-0.537711	0.282506	-0.179906	1	TNRC6A
ENSG00000090924	-0.200988	0.749042	-0.0754861	0.95605	0.125502	1	PLEKHG2
ENSG00000090932	0.661485	0.510762	1.05015	0.413174	0.388666	1	DLL3
ENSG00000090971	0.42776	0.498475	0.164317	0.907209	-0.263443	1	NAT14
ENSG00000090975	-0.508578	0.539723	-0.0521598	0.982578	0.456418	1	PITPNM2
ENSG00000090989	-0.0754264	0.88903	-0.00953918	0.990685	0.0658873	1	EXOC1
ENSG00000091009	-0.0457762	0.951994	-0.130319	0.882244	-0.0845424	1	RBM27
ENSG00000091010	0.43028	NA	0.262015	NA	-0.168265	1	POU4F3
ENSG00000091039	-0.256746	0.696921	-0.29364	0.787804	-0.0368946	1	OSBPL8
ENSG00000091073	-0.4286	0.495288	0.120821	0.935263	0.549421	1	DTX2
ENSG00000091106	-0.701198	0.702457	-0.302026	NA	0.399172	1	NLRC4
ENSG00000091127	-0.795859	0.0625304	-0.368497	0.722096	0.427362	1	PUS7
ENSG00000091128	-0.405991	0.879021	-0.320905	NA	0.0850858	1	LAMB4
ENSG00000091129	0.439956	0.522215	0.197843	0.893687	-0.242113	1	NRCAM
ENSG00000091136	-0.492668	0.459215	-0.405469	0.749551	0.0871989	1	LAMB1
ENSG00000091137	-2.46201	0.152642	-0.862405	NA	1.5996	1	SLC26A4
ENSG00000091138	1.70896	NA	1.49843	NA	-0.210529	1	SLC26A3
ENSG00000091140	-0.0979731	0.742712	-0.0393956	0.948309	0.0585775	1	DLD
ENSG00000091157	-0.0475419	0.948499	-0.133488	0.878633	-0.0859461	1	WDR7
ENSG00000091164	0.0131315	0.986305	0.164876	0.824281	0.151744	1	TXNL1
ENSG00000091181	0.0797594	NA	1.21548	NA	1.13572	1	IL5RA
ENSG00000091262	-1.13872	0.609534	0.254485	NA	1.3932	1	ABCC6
ENSG00000091317	-0.118811	0.829677	-0.233887	0.743152	-0.115076	1	CMTM6
ENSG00000091409	0.135351	0.815105	-0.00278183	0.998176	-0.138133	1	ITGA6
ENSG00000091428	0.192707	0.895712	0.137017	0.9607	-0.0556901	1	RAPGEF4
ENSG00000091436	-0.434796	0.536358	-0.372962	0.775787	0.0618338	1	MAP3K20
ENSG00000091482	-1.71147	NA	1.72052	NA	3.432	1	SMPX
ENSG00000091483	0.0702934	0.897882	0.115321	0.88157	0.045028	1	FH
ENSG00000091490	0.19406	0.731584	-0.0116624	0.99092	-0.205722	1	SEL1L3
ENSG00000091513	0.217162	0.908884	0.123159	NA	-0.0940029	1	TF
ENSG00000091527	-0.230027	0.586097	-0.154981	0.846486	0.0750467	1	CDV3
ENSG00000091536	-1.44822	0.636584	0.184341	NA	1.63256	1	MYO15A
ENSG00000091542	0.125485	0.815105	0.0928191	0.91624	-0.0326656	1	ALKBH5
ENSG00000091583	0.534639	NA	1.28588	NA	0.751245	1	APOH
ENSG00000091592	0.610527	0.116146	0.503428	0.4192	-0.107099	1	NLRP1
ENSG00000091622	0.194156	0.817245	0.219736	0.864565	0.0255804	1	PITPNM3
ENSG00000091640	0.0932386	0.809222	0.112815	0.84061	0.0195768	1	SPAG7
ENSG00000091651	-0.229331	0.595837	-0.196508	0.801334	0.0328231	1	ORC6
ENSG00000091656	0.0619217	0.959041	-0.272689	0.828042	-0.33461	1	ZFHX4
ENSG00000091664	0.788186	0.486812	0.301357	0.905213	-0.486829	1	SLC17A6
ENSG00000091704	0	NA	0	NA	0	1	CPA1
ENSG00000091732	-0.0990506	0.82535	-0.0564893	0.942082	0.0425612	1	ZC3HC1
ENSG00000091831	-1.90356	0.60222	-1.12134	NA	0.782214	1	ESR1
ENSG00000091844	-0.329551	0.687535	-0.277398	0.84418	0.0521529	1	RGS17
ENSG00000091879	0.156349	0.955192	-0.161095	NA	-0.317444	1	ANGPT2
ENSG00000091947	0.0351235	0.964515	0.241051	0.768262	0.205927	1	TMEM101
ENSG00000091972	0.0892622	0.874371	0.0300945	0.976405	-0.0591677	1	CD200
ENSG00000091986	-0.00165986	0.998669	-0.21248	0.84418	-0.21082	1	CCDC80
ENSG00000092009	0.471171	NA	2.02748	NA	1.55631	1	CMA1
ENSG00000092010	-0.166438	0.808011	0.101062	0.932048	0.2675	1	PSME1
ENSG00000092020	-0.0679999	0.90908	0.0552931	0.959309	0.123293	1	PPP2R3C
ENSG00000092036	-0.144899	0.835094	0.0936617	0.935263	0.238561	1	HAUS4
ENSG00000092051	0.710405	0.219109	0.252807	0.86152	-0.457598	1	JPH4
ENSG00000092054	0.809008	0.243593	0.0333185	0.989315	-0.775689	1	MYH7
ENSG00000092067	NA	NA	NA	NA	NA	NA	CEBPE
ENSG00000092068	0.0834094	0.927751	-0.044489	0.976405	-0.127898	1	SLC7A8
ENSG00000092094	-0.089727	0.89208	0.0468459	0.970583	0.136573	1	OSGEP
ENSG00000092096	0.648087	0.252681	0.577876	0.54798	-0.0702112	1	SLC22A17
ENSG00000092098	0.223122	0.645495	0.239574	0.771558	0.0164524	1	RNF31
ENSG00000092108	-0.137049	0.787248	0.0416615	0.970583	0.17871	1	SCFD1
ENSG00000092140	-0.168398	0.788039	-0.29471	0.731576	-0.126313	1	G2E3
ENSG00000092148	-0.256915	0.595993	-0.359824	0.622173	-0.102909	1	HECTD1
ENSG00000092199	-0.180423	0.6705	-0.0107166	0.990685	0.169707	1	HNRNPC
ENSG00000092200	0.35362	0.920873	0.208027	NA	-0.145593	1	RPGRIP1
ENSG00000092201	-0.101869	0.844503	-0.228787	0.722096	-0.126918	1	SUPT16H
ENSG00000092203	0.0296321	0.95636	-0.0138012	0.988449	-0.0434333	1	TOX4
ENSG00000092208	0.161175	0.81588	0.156321	0.885507	-0.00485387	1	GEMIN2
ENSG00000092295	-1.36621	0.589419	-1.08855	NA	0.277668	1	TGM1
ENSG00000092330	0.0740043	0.864203	0.216643	0.648939	0.142639	1	TINF2
ENSG00000092345	0.990697	NA	0.780161	NA	-0.210536	1	DAZL
ENSG00000092377	0.349663	0.780296	0.248284	NA	-0.101379	1	TBL1Y
ENSG00000092421	0.54865	0.408874	0.0591355	0.975579	-0.489514	1	SEMA6A
ENSG00000092439	-0.136191	0.795159	-0.22771	0.752127	-0.0915188	1	TRPM7
ENSG00000092445	0.186503	0.652765	0.0183214	0.987853	-0.168182	1	TYRO3
ENSG00000092470	-0.345724	0.664687	-0.0313238	0.988674	0.314401	1	WDR76
ENSG00000092529	-3.89444	0.359248	-0.960279	NA	2.93416	1	CAPN3
ENSG00000092531	-0.0829574	0.888235	-0.109471	0.895196	-0.0265134	1	SNAP23
ENSG00000092607	-0.694007	0.893038	0.308853	NA	1.00286	1	TBX15
ENSG00000092621	-0.0525607	0.94623	0.0714389	0.948222	0.124	1	PHGDH
ENSG00000092758	0.18876	0.845341	-0.221123	0.875951	-0.409882	1	COL9A3
ENSG00000092820	-0.592672	0.312783	-0.0745851	0.970399	0.518087	1	EZR
ENSG00000092841	0.266582	0.582202	0.407749	0.529565	0.141167	1	MYL6
ENSG00000092847	0.212144	0.614254	-0.00704964	0.994896	-0.219193	1	AGO1
ENSG00000092850	0.0810697	0.975435	0.504745	0.866008	0.423676	1	TEKT2
ENSG00000092853	-0.0732549	0.942589	-0.374722	0.718305	-0.301467	1	CLSPN
ENSG00000092871	-0.0635234	0.911329	0.00946944	0.99092	0.0729928	1	RFFL
ENSG00000092929	-6.02159	NA	0.0890317	NA	6.11062	NA	UNC13D
ENSG00000092931	0.0199415	0.978977	0.0797144	0.930756	0.0597729	1	MFSD11
ENSG00000092964	0.092124	0.899522	0.122241	0.907096	0.0301172	1	DPYSL2
ENSG00000092969	-0.293288	0.688619	-0.421509	0.711104	-0.128221	1	TGFB2
ENSG00000092978	-0.0991506	0.865571	-0.0626576	0.949351	0.036493	1	GPATCH2
ENSG00000093000	-0.187881	0.663848	-0.174406	0.812656	0.0134748	1	NUP50
ENSG00000093009	-0.213362	0.648674	0.0550827	0.963941	0.268445	1	CDC45
ENSG00000093010	-1.70405	NA	0.107998	NA	1.81205	NA	COMT
ENSG00000093072	-0.0996336	0.923572	0.176924	0.897848	0.276558	1	ADA2
ENSG00000093100	-2.76229	NA	1.2084	NA	3.97069	1	NA
ENSG00000093134	-2.75521	NA	0	NA	2.08407	1	VNN3P
ENSG00000093144	-0.107442	0.797754	-0.120085	0.847117	-0.0126434	1	ECHDC1
[truncated: 58,676 more rows]
